# Supplementary material for: Calpain-2 participates in the process of calpain-1 inactivation
Source: PubMed Central journal article supplement (PMC7610153; doi:10.1042/bsr20200552), 2020-11-03
Supplement: BSR-2020-0552_supp.pdf [file BSR-2020-0552_supp.pdf]

## **Supplementary Figures**

Figure S1. Sustained proteolytic reaction by C1 but not by C2.

Figure S2. Summary of autolytic fragments from C1 and C2.

Figure S3. Expression of calpain related molecules in different cell lines.

Figure S4. Downregulation of CAPN1 and CAPN2 in HCT116 cells.

Figure S5. Cleavability prediction of human calpain PC1 domains.

Figure S6. Uncropped images of the western blots presented in the Fig. S3B.

Figure S7. Uncropped images of the western blots presented in the Fig. S3C.

Figure S8. Uncropped images of the western blots presented in the Fig. 8A

Figure S9. Uncropped images of the western blots presented in the Fig. 8B.

Figure S10. Uncropped images of the western blots presented in the Fig. 8C.

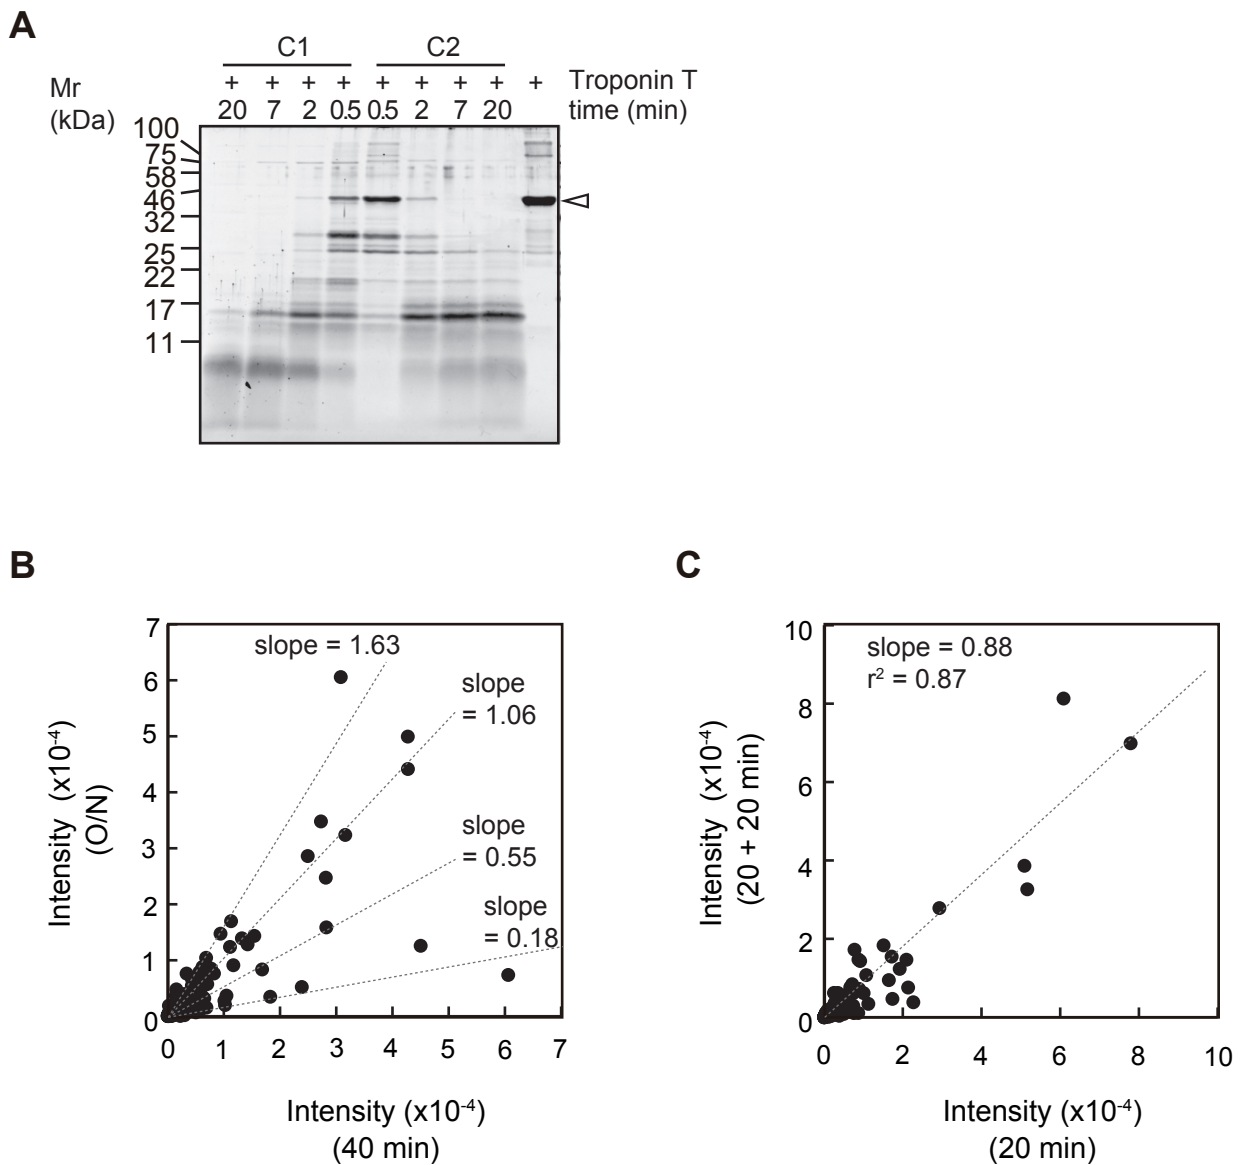

**Figure S1. Sustained proteolytic reaction by C1 but not by C2.**

(A) One microgram of TnT was incubated with C1 or C2 in the presence of  $\text{Ca}^{2+}$  for an indicated time. The amount of calpain was 1/50 of that used in Fig. 1A. Open arrowhead, intact TnT.

(B) Digestion of TnT by C1 was carried out overnight, and the products were subjected to LC-MS/MS analysis. Each dot represents a distinct peptide. When compared to the result after 40 min of digestion, the intensities of some peptides decreased or increased over time, suggesting sustained proteolytic activity of C1. The cleavage products were categorized into four groups, and regression lines were drawn. The categories, based on the ratio of intensities after an overnight reaction vs. a 40-min reaction, were as follows:  $> 1.25$ ;  $0.8-1.25$ ;  $0.33-0.8$ ; and  $< 0.33$ .

(C) After 20 min of digestion of TnT with 0.16 units of C2, the same amount of C2 was added. After an additional 20 min of reaction, no significant change in intensity was observed, suggesting rapid completion of TnT proteolysis by C2.

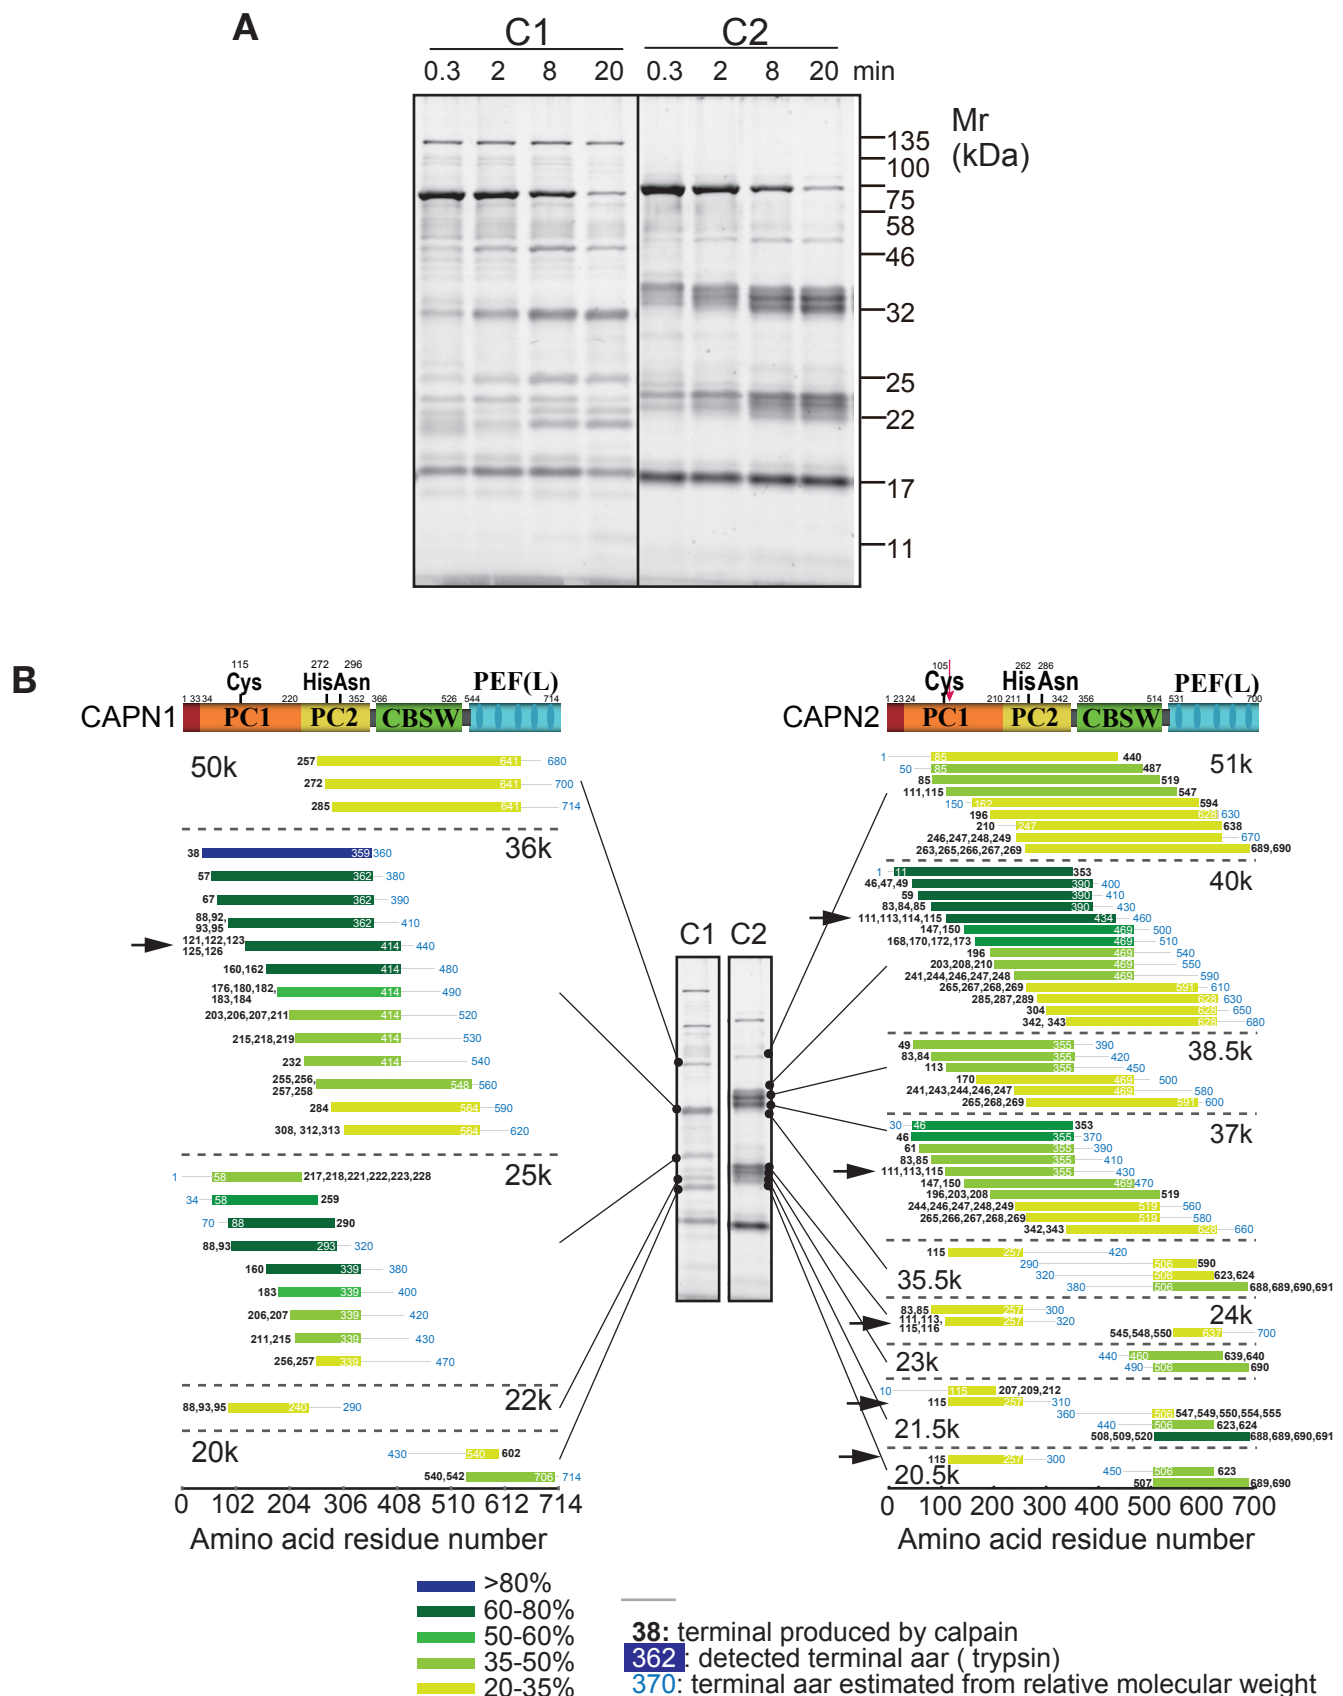

**Figure S2. Summary of autolytic fragments from C1 and C2.**

(A) C1 or C2 was incubated in 80mM HEPE(pH7.5), 1mM TCEP, and 1mM (for C1) or 6mM (for C2) CaCl<sub>2</sub> at 30 °C for 20 sec, or 2, 8, or 20 min. The reaction was terminated by addition of SDS-PAGE sample buffer, and the products were resolved by SDS-PAGE. Representative degradation fragments were subjected to in-gel digestion with trypsin or Asp-N and analyzed by LC-MS/MS.

(B) Autolytic fragments of C1 or C2, deduced from the identified sequence and fragment size in SDS-PAGE, are shown schematically. When the terminal amino acid residue of peptides did not match cleavage by either trypsin or Asp-N, *i.e.*, at the C-terminus of Lys or Arg or the N-terminus of Asp or Glu, the position was defined as a calpain autolytic site. Rectangles indicate regions for which representative peptides were actually identified. The rectangles were colored according to the amino acid coverage: dark blue, > 80%; dark green, 60-80%; green, 50-60%; light green, 35-50%; yellow-green, 20-35%. Bold, calpain autolytic site; outlined, trypsin or Asp-N cleavage site; blue, estimated terminal amino acid residue number. Arrows indicate the cleavage proximal to the CuT1-3.

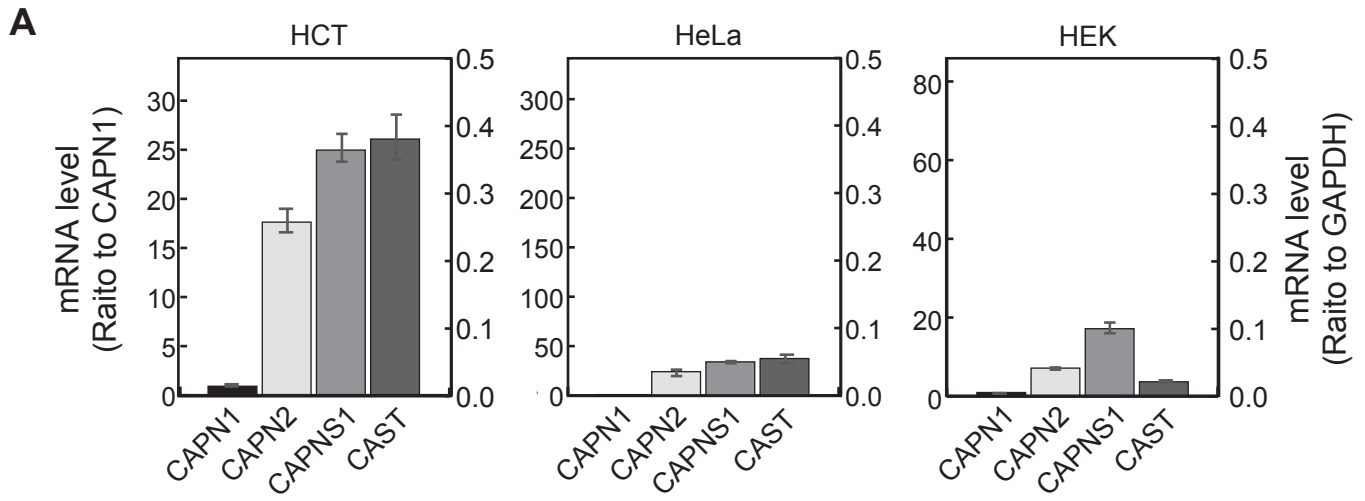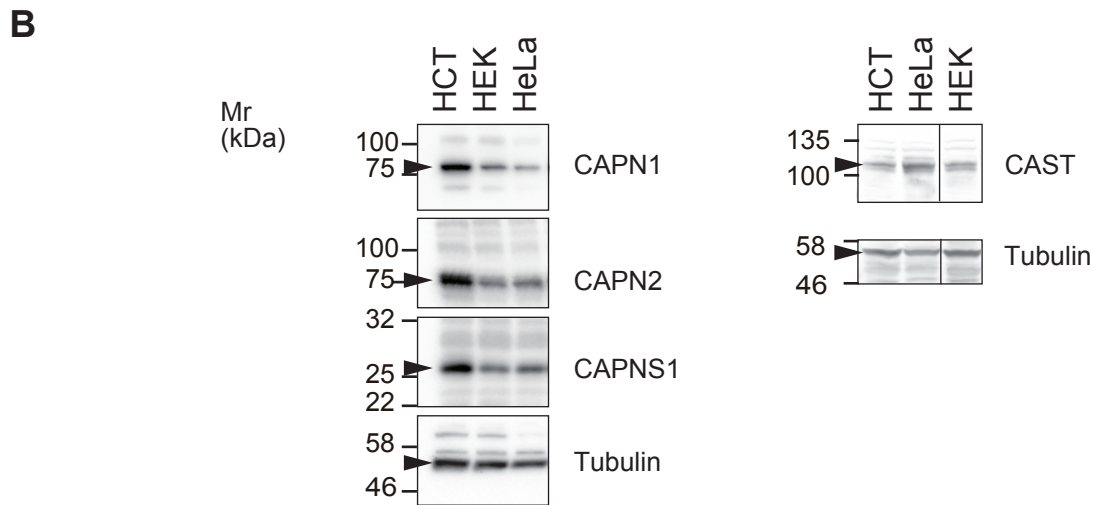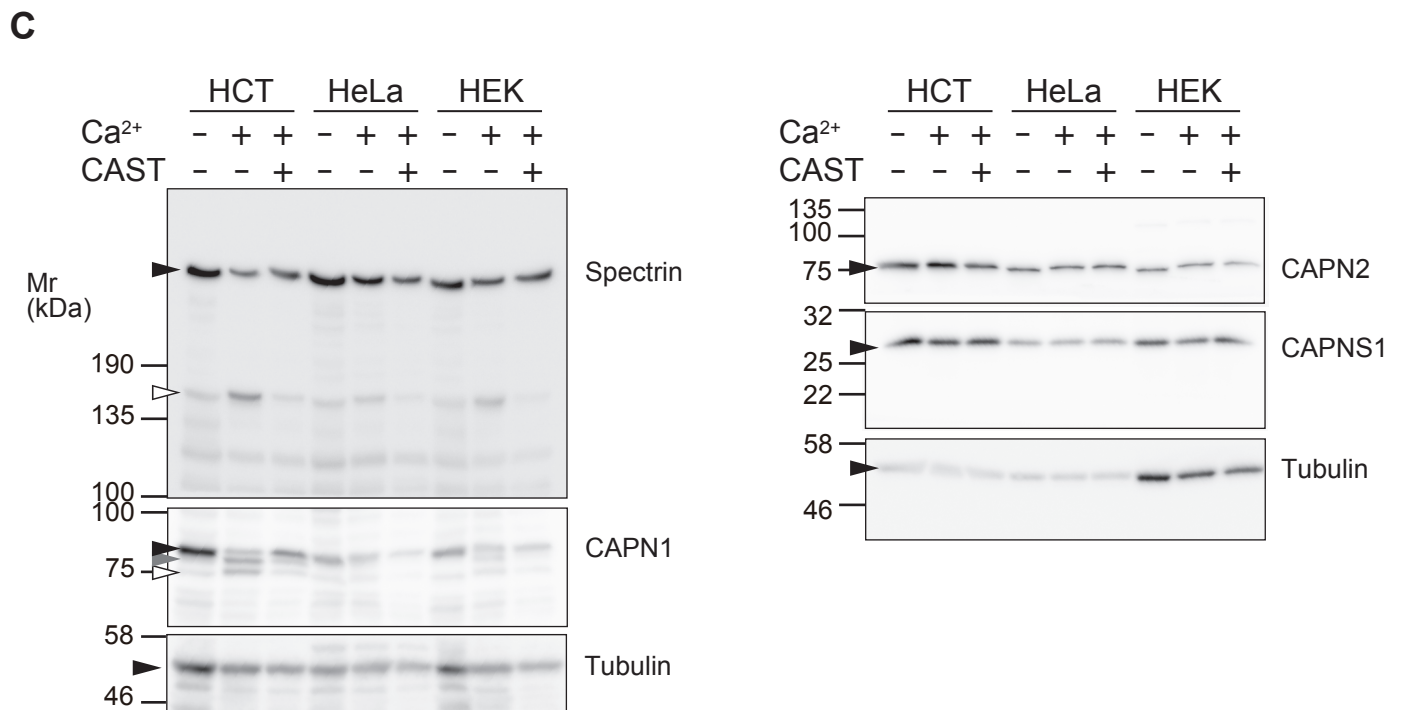

**Figure S3. Expression of calpain related molecules in different cell lines.**

**(A) Relative amount of expressed mRNA.** mRNA expression levels of CAPN1, CAPN2, CAPNS1, and CAST in HCT116, HeLa and HEK293 cells were analyzed by RT-qPCR. Reactions were carried out in triplicate and results were normalized according to GAPDH quantitation in the same reaction (right scale). Relative ratio to CAPN1 expression is also shown (left scale).

**(B) Expression level of proteins.** CAPN1, CAPN2, CAPNS1, and CAST protein levels in cell lysates were analyzed by western blot. Equal amounts of protein (10  $\mu$ g in left panel, 27  $\mu$ g in right panel) were separated by SDS-PAGE, and tubulin was used as a loading control.

**(C) Calpain-dependent proteolysis of spectrin and calpains.**

Left panel: Cell lysates were diluted to 1 mg/mL and incubated with 5mM  $\text{CaCl}_2$  in the absence or presence of 40 nM CAST-d1 at 30 °C. Proteolysis of spectrin and autolysis of calpain-1 were analyzed by western blot. Generation of proteolyzed fragment, ca. 150 kDa, was most obviously detected in HCT116 cells. Each lane contains 10  $\mu$ g of proteins.

Right panel: Cell lysates were diluted to 1 mg/mL and incubated with 5mM  $\text{CaCl}_2$  in the absence or presence of 40 nM CAST-d1 at 30 °C. Autolysis of calpains were analyzed by western blot. Each lane contains 15  $\mu$ g (HCT116 and HeLa cells) and 20  $\mu$ g (HEK293 cell) of proteins. Activation-associated autolysis of C2 is not observable as a change of fragment size of CAPN2 [36].

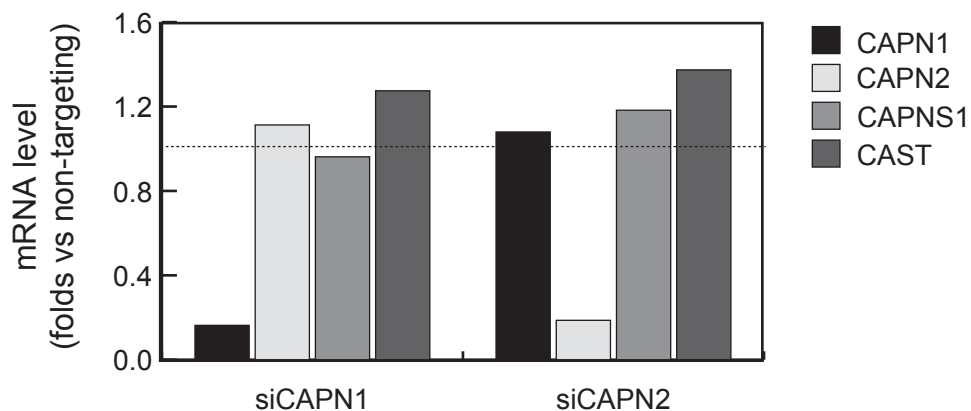

**Figure S4. Downregulation of CAPN1 and CAPN2 in HCT116 cells.**

HCT116 cells were transfected with siRNA targeting CAPN1 or CAPN2, or non-targeting siRNA (nt). After 24 h, the efficiency and specificity of knockdown was analyzed by RT-qPCR. Analysis was performed in duplicate, and results were normalized according to GAPDH quantitation in the same reaction. Data are presented as relative ratio to values obtained for the cells treated with nt siRNA.

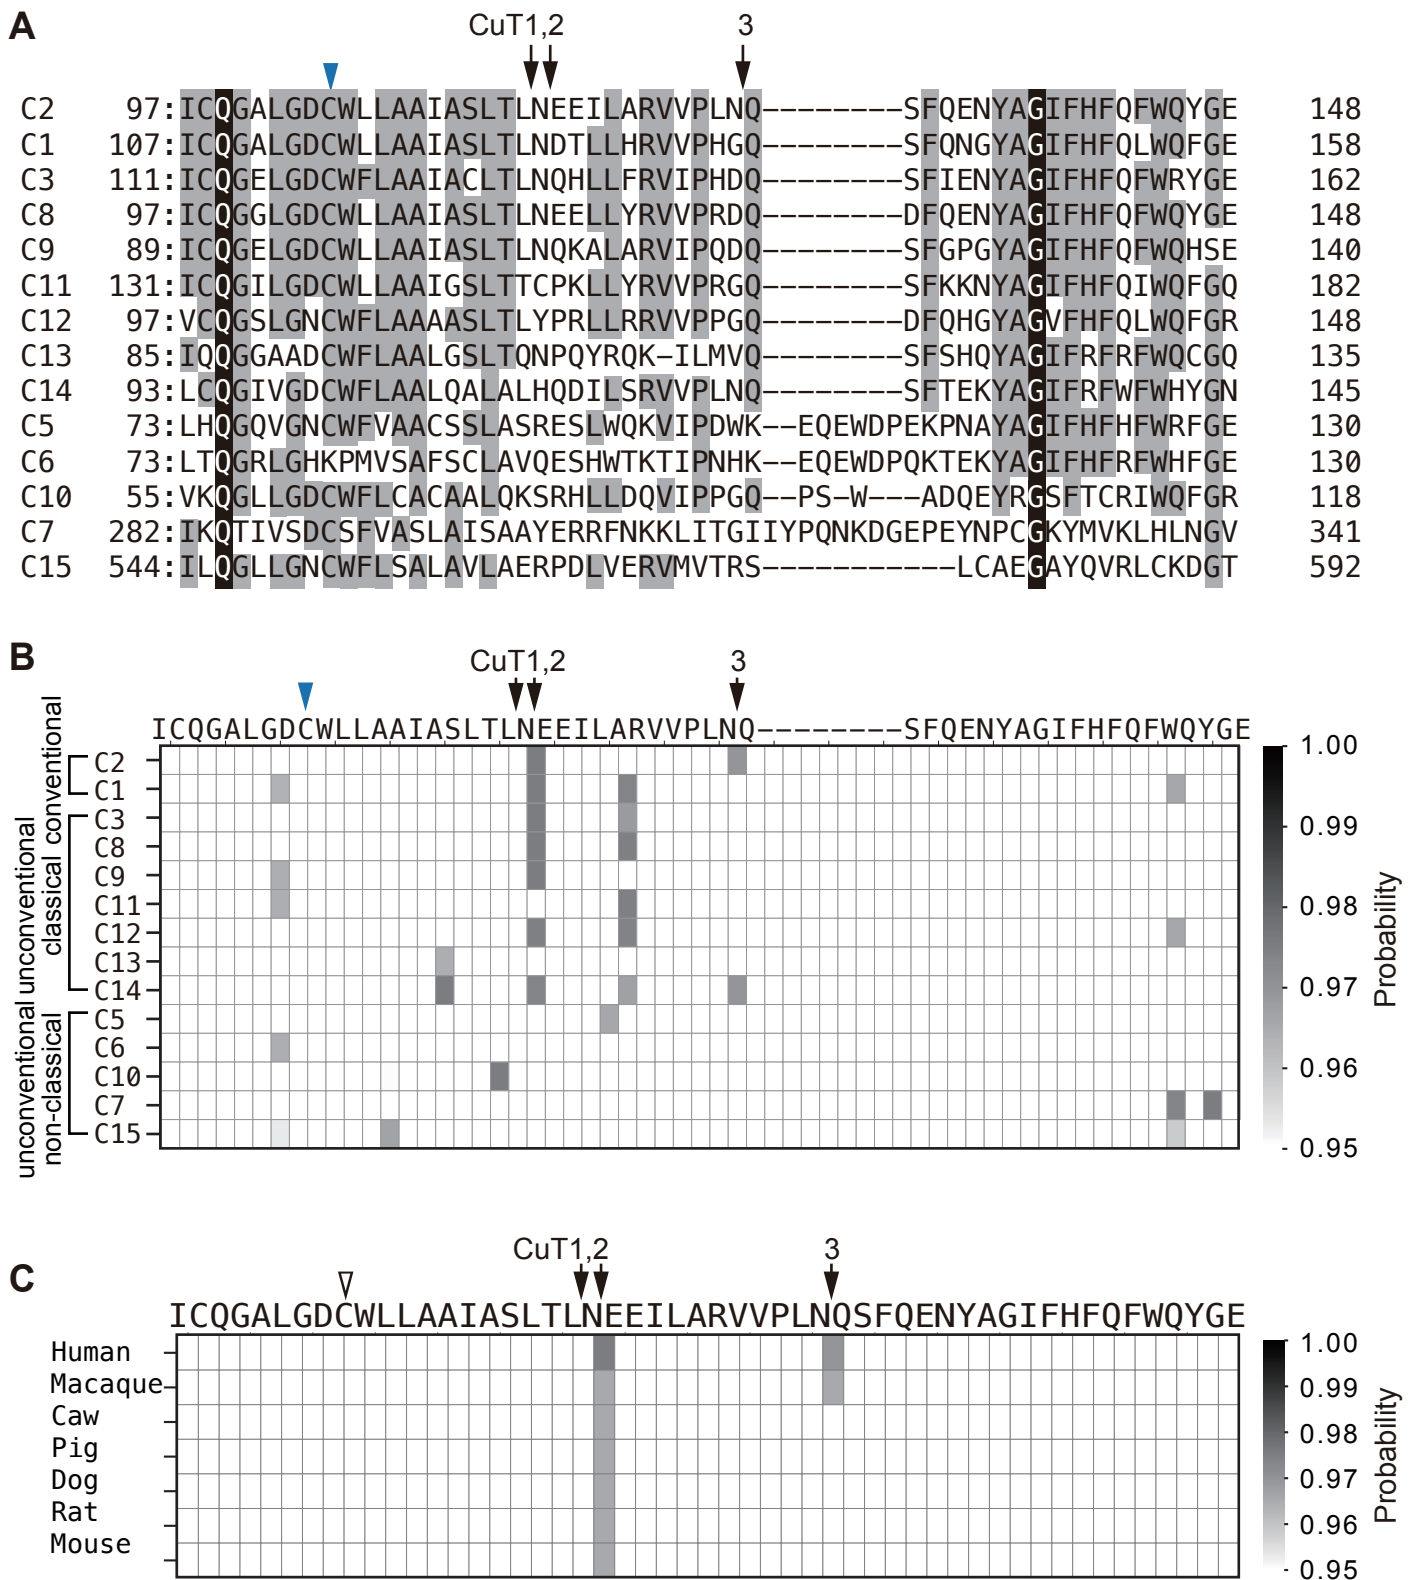

**Figure S5. Cleavability prediction of human calpain PC1 domains.**

(A) The amino acid sequence 91-156 aa of CAPN2 was aligned with the corresponding region from human CAPN1-15. Arrows, CuT1-3. Arrow head, active site Cys (except in CAPN6). Highly and moderately conserved residues are highlighted in black and gray, respectively. Human CAPN sequence data were retrieved from UniProtKB. CAPN1, P07384; CAPN2, P17655; CAPN3, P20807; CAPN5, O15484; CAPN6, Q9Y6Q1; CAPN7, Q9Y6W3; CAPN8, A6NHC0; CAPN9, O014815; CAPN10, Q9HC96; CAPN11, Q9UMQ6; CAPN12, Q6ZSI9; CAPN13, Q6MZZ7; CAPN14, A8MX76; CAPN15, O75808.

(B) Cleavage probabilities within the above sequences were calculated using Calpacchopper (<http://calpain.org/predict.rb?cls=substrate>). Results are shown for probability values larger than 0.95.

(C) Cleavage probabilities of mammalian CAPN2 orthologues were calculated using Calpacchopper.

Figure S3B (left)

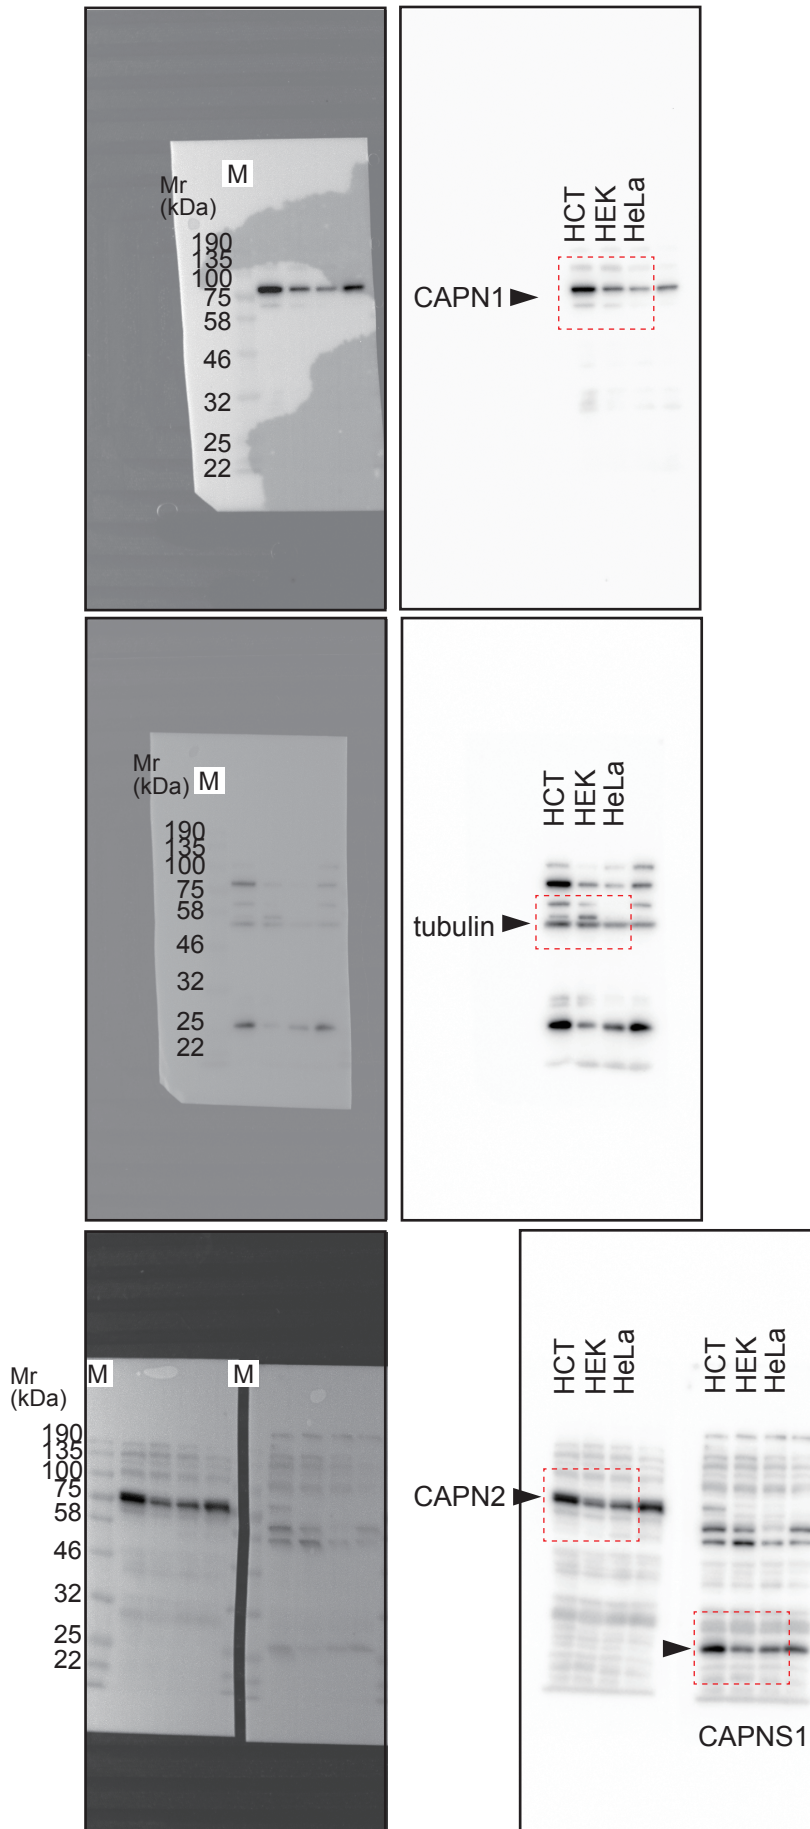



Figure S3B (right)

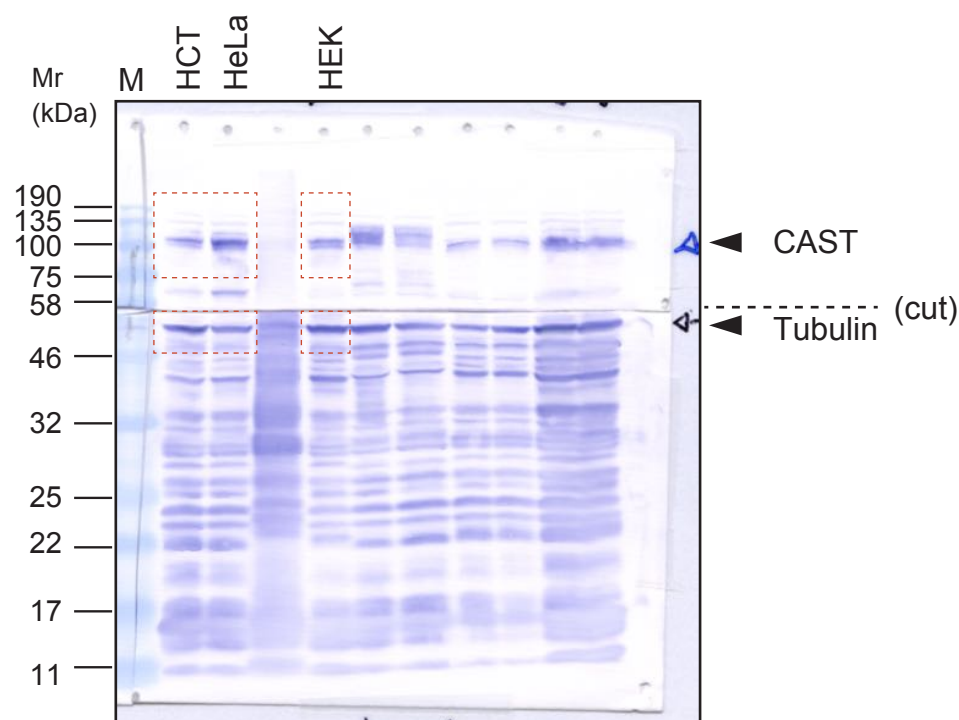

**Figure S6. Uncropped images of the western blots presented in the Fig. S3B.**

M: Blue prestained Protein Standard (P7706, NEB). For the right panels of Fig. S3B, signals were visualized using a POD immunostaining set. Scanned image was cropped and converted to black and white mode. Other images were acquired using FUSION FX7.EDGE (VILBER LOURMAT) by digitization (left) and chemiluminescence (right) functions.

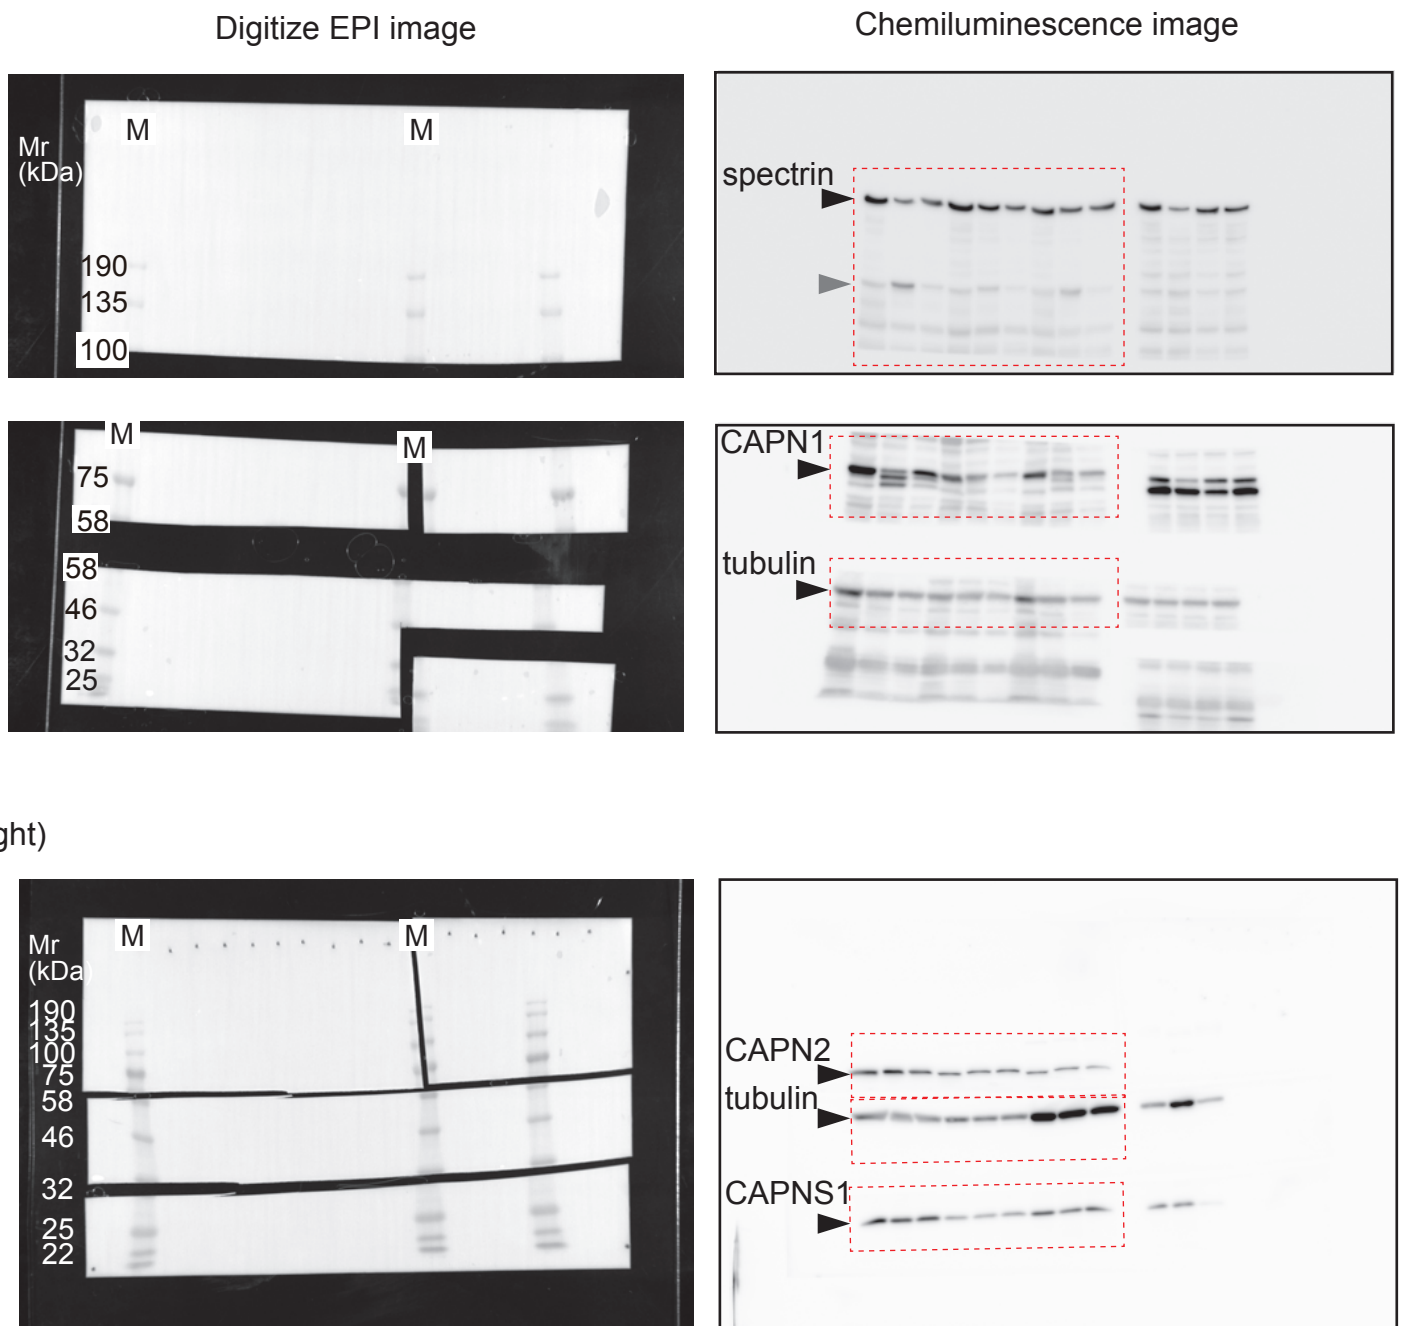

(right)

**Figure S7. Uncropped images of the western blots presented in the Fig. S3C.**

M: Blue prestained Protein Standard (P7706, NEB). Images were acquired using ImageQuant LAS 4000 by digitization (left) and chemiluminescence (right) functions.

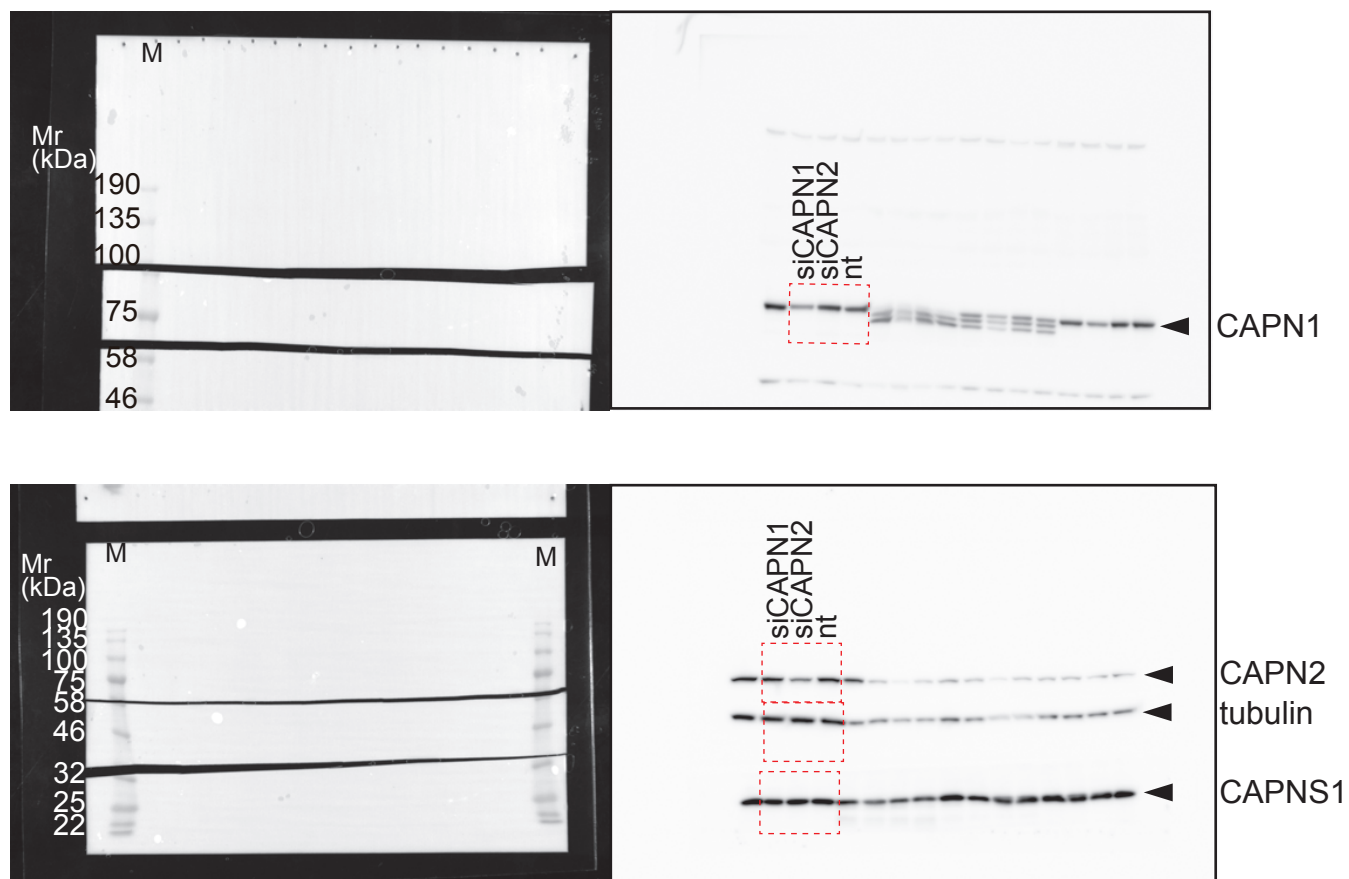

**Figure S8. Uncropped images of the western blots presented in the Fig. 8A.** M: Blue prestained Protein Standard (P7706, NEB). Images were acquired using ImageQuant LAS 4000 by digitization (left) and chemiluminescence (right) functions.

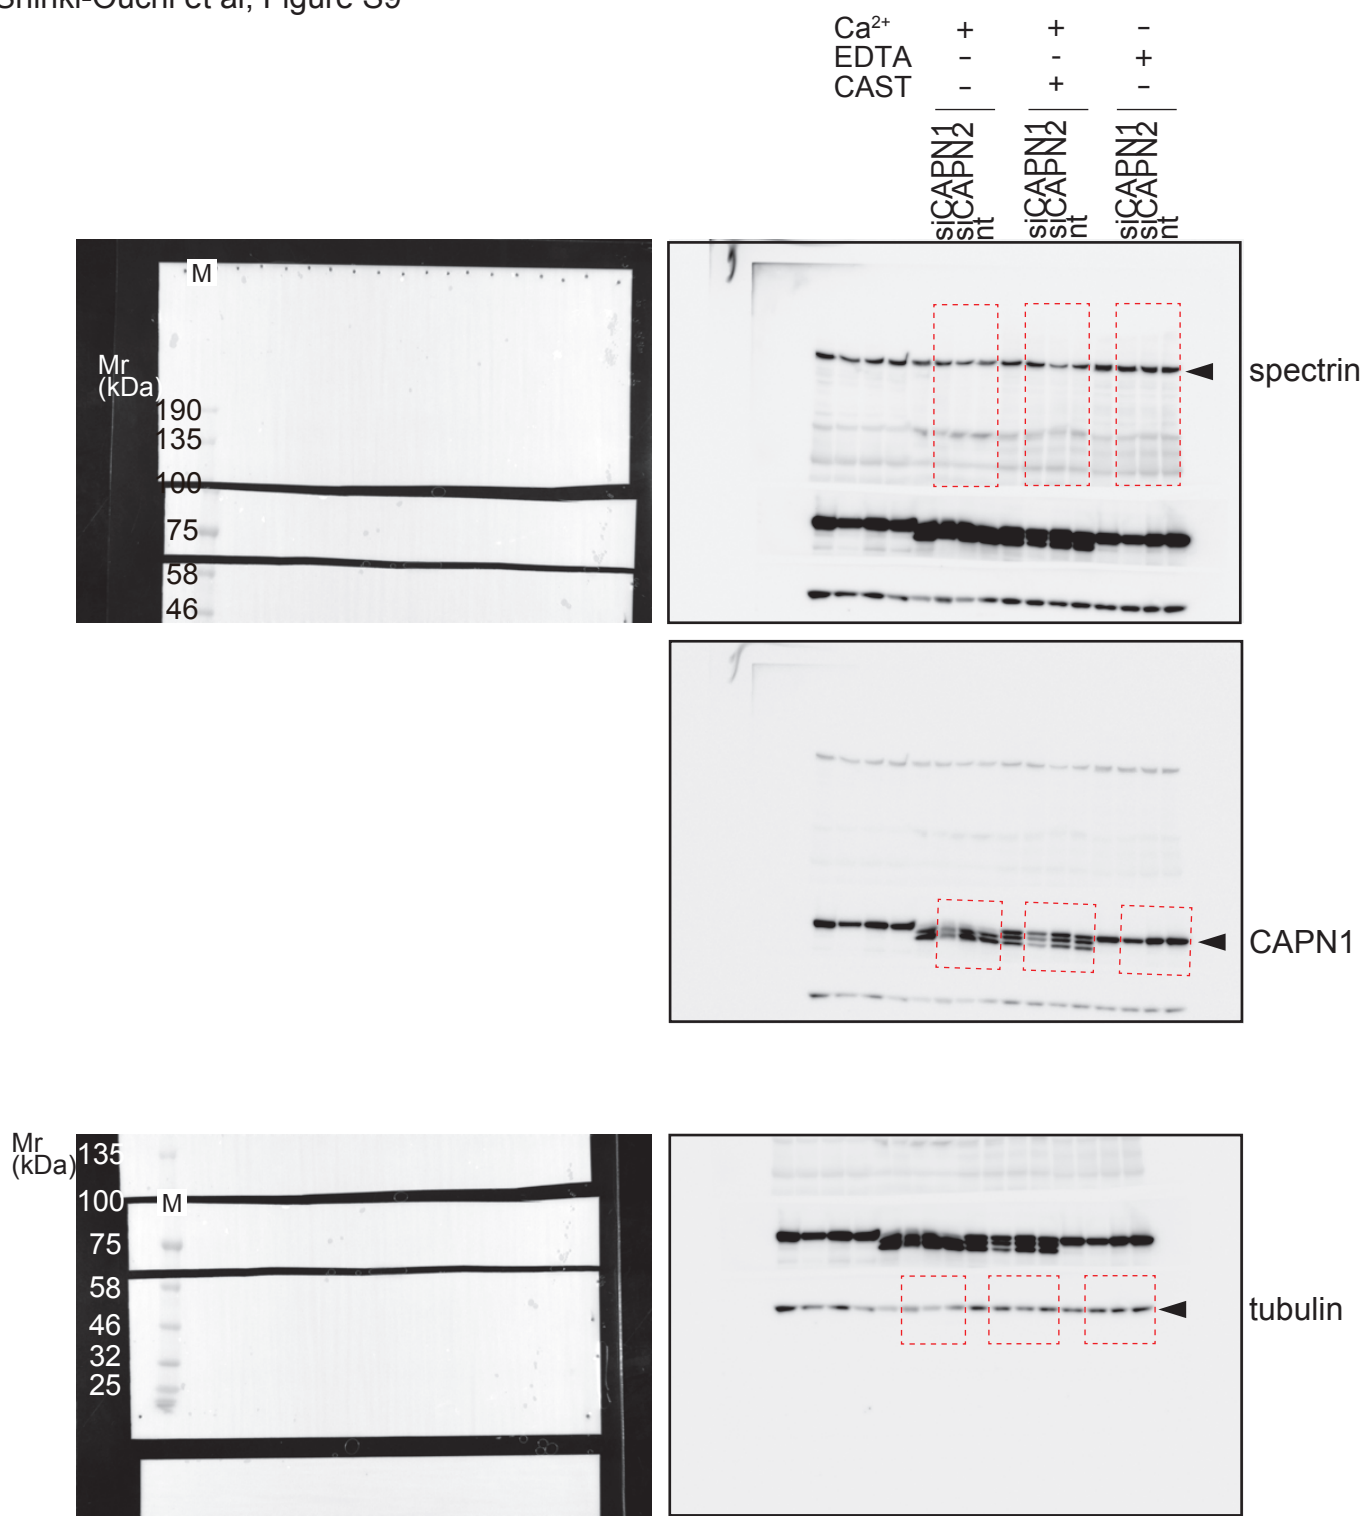

**Figure S9. Uncropped images of the western blots presented in the Fig. 8B.**  
M: Blue prestained Protein Standard (P7706, NEB). Images were acquired using ImageQuant LAS 4000 by digitization (left) and chemiluminescence (right) functions.

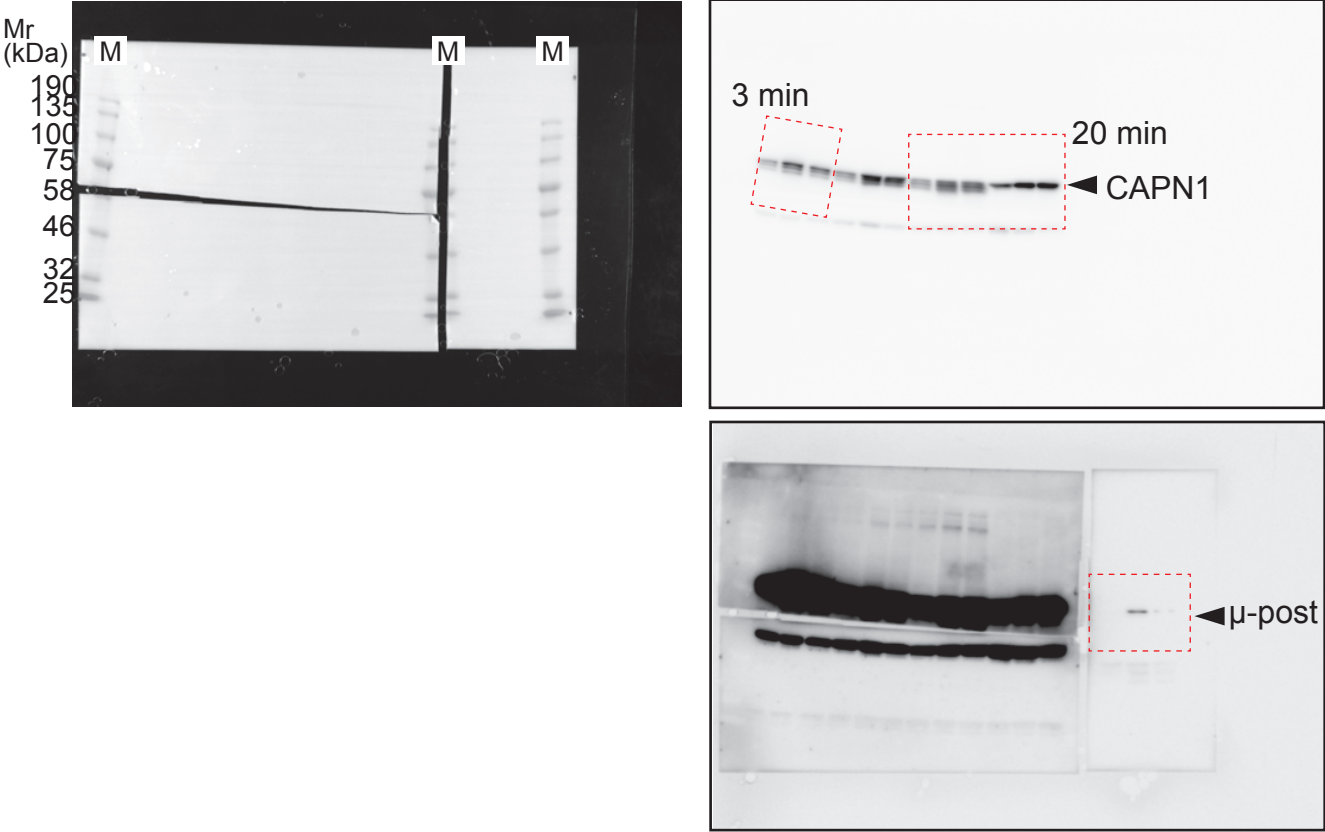

**Figure S10. Uncropped images of the western blots presented in the Fig. 8C.** M: Blue prestained Protein Standard (P7706, NEB). Images were acquired using ImageQuant LAS 4000 by digitization (left) and chemiluminescence (right) functions.

## Supplementary Tables

Table S1. List of Troponin T peptides generated by calpain.

Peptides were extracted from the distinct peptide list generated with ProteinPilot software by the following conditions; Accessions, P45389 TNNT2\_human; "Best conf (Peptide)" > 96.8 (FDR < 1%); permitted modifications, iTRAQ at N-terminus and/or Lys, oxidation at Met, methylthio at Cys, PyroGlu at N-terminus; omit decoy sequence; quant annotation, Auto or Auto--shared MS/MS. The cleavage sites are indicated by the number of amino acid position N-terminus to the cleavage site.

Table S2. List of catalytic subunit of calpain-1 peptides generated by autolysis.

Peptides were extracted from the distinct peptide list generated with ProteinPilot software by the following conditions; Accessions, P35750\_CAN1\_PIG; "Best conf (Peptide)" > 96.8 (FDR < 1%); permitted modifications; iTRAQ at N-terminus and/or Lys, oxidation at Met, methylthio at Cys, PyroGlu at N-terminus; omit decoy sequence; quant annotation, Auto or Auto--shared MS/MS. The cleavage sites are indicated by the number of amino acid position N-terminus to the cleavage site.

Table S3. List of catalytic subunit of calpain-2 peptides generated by autolysis.

Peptides were extracted from the distinct peptide list generated with ProteinPilot software by the following conditions; Accessions, P17655\_CAN2\_HUMAN+ "Best conf (Peptide)" > 96.8 (FDR < 1%); permitted modifications, iTRAQ at N-terminus and/or Lys, oxidation at Met, methylthio at Cys, PyroGlu at N-terminus; omit decoy sequence; quant annotation, Auto or Auto--shared MS/MS. The cleavage sites are indicated by the number of amino acid position N-terminus to the cleavage site.

Table S4. List of catalytic subunit of calpain-2 peptides generated by calpain-1.

Peptides were extracted from the distinct peptide list generated with ProteinPilot software by the following conditions; Accessions, P17655\_CAN2\_HUMAN; "Best conf (Peptide)" > 93.7 (FDR < 1%); permitted modifications, oxidation at Met, methylthio at Cys, PyroGlu at N-terminus; omit decoy sequence. The cleavage sites are indicated by the number of amino acid position N-terminus to the cleavage site.

Table S5. List of catalytic subunit of calpain-2 peptides generated by calpain-2.

Peptides were extracted from the distinct peptide list generated with ProteinPilot software by the following conditions; Accessions, P17655\_CAN2\_HUMAN; "Best conf (Peptide)" > 94.1 (FDR < 1%); permitted modifications, oxidation at Met, methylthio at Cys, PyroGlu at N-terminus; omit decoy sequence. The cleavage sites were described with number of amino acid position of N-terminus of the cleavage site. Bold letter, product of CuT cleavage. \*, Peptides produced by cleavage at least one of the CuT sites.

Table S6. List of calpain small subunit peptides generated by C2.

Peptides were extracted from the distinct peptide list generated with ProteinPilot software by the following conditions; Accessions, P04632|CPNS1\_HUMAN; "Best conf (Peptide)" > 81.6 (FDR < 1%); permitted modifications, iTRAQ at N-terminus and/or Lys, oxidation at Met, methylthio at Cys, PyroGlu at N-terminus; permitted quant annotation, Auto and Auto--shared MS/MS with intensity higher than 50; start position, > 25. The cleavage sites are indicated by the number of amino acid position N-terminus to the cleavage site.

Table S7. List of C2 specific peptides in PC domain generated by C2 in the presence and absence of C1:CS.

Peptides were extracted from the distinct peptide list generated with ProteinPilot software by the following conditions; Accessions, P04632|CPNS1\_HUMAN; "Best conf (Peptide)" > 81.6 (FDR < 1%); permitted modifications, iTRAQ at N-terminus and/or Lys, oxidation at Met, methylthio at Cys, PyroGlu at N-terminus; permitted quant annotation, Auto and Auto--shared MS/MS with intensity higher than 50; start position, > 25. The cleavage sites are indicated by the number of amino acid position N-terminus to the cleavage site.

Table S8. List of common peptides among C1 and C2 generated by C2.

Peptides were extracted from the distinct peptide list generated with ProteinPilot software by the following conditions; Accessions, P04632|CPNS1\_HUMAN; "Best conf (Peptide)" > 81.6 (FDR < 1%); permitted modifications, iTRAQ at N-terminus and/or Lys, oxidation at Met, methylthio at Cys, PyroGlu at N-terminus; permitted quant annotation, Auto and Auto--shared MS/MS with intensity higher than 50; start position, > 25. The cleavage sites are indicated by the number of amino acid position N-terminus to the cleavage site.

Table S1. List of TroponinT peptide generated by calpain.

| Sequence                                       | Theor<br>z | Obs m/z   | Theor m/z | dMass  | Modifications                                                                    | Best Conf<br>(Peptide) | Intensity<br>(Peptide) | Intensity (iTRAQ)   |         |                     |         |                     |         |                     |         |                        |                |                |        | Start<br>Position | cleavage sites |         |
|------------------------------------------------|------------|-----------|-----------|--------|----------------------------------------------------------------------------------|------------------------|------------------------|---------------------|---------|---------------------|---------|---------------------|---------|---------------------|---------|------------------------|----------------|----------------|--------|-------------------|----------------|---------|
|                                                |            |           |           |        |                                                                                  |                        |                        | C2<br>40min<br>Area |         | C2<br>20min<br>Area |         | C1<br>40min<br>Area |         | C1<br>20min<br>Area |         | C1,<br>40min/20mi<br>n | 40min<br>C1/C2 | 20min<br>C1/C2 | N site |                   | C site         |         |
|                                                |            |           |           |        |                                                                                  |                        |                        | 114                 | Err 114 | 115                 | Err 115 | 116                 | Err 116 | 117                 | Err 117 |                        |                |                |        |                   |                | 116/117 |
| EQEEAAEEDAEAEAEETETR                           | 3          | 804.0146  | 804.0093  | 0.0158 | iTRAQ4plex@N-term                                                                | 99                     | 4933.25                | 254.71              | 49.08   | 217.13              | 47.95   | 474.39              | 68.11   | 325.01              | 56.75   | 1.460                  | 1.862          | 1.497          | 33     | 32                | 52             |         |
| QEEAAEEDAEAEAEETETRAEEDDEEEEEEAKEAEDGPM        | 4          | 1111.4790 | 1111.4633 | 0.0645 | iTRAQ4plex@N-term;<br>iTRAQ4plex(K)@30                                           | 99                     | 584.36                 | 193.53              | 42.66   | 109.63              | 33.61   | 11.42               | 13.78   | 48.01               | 21.21   | 0.238                  | 0.059          | 0.438          | 34     | 33                | 70             |         |
| QEEAAEEDAEAEAEETETRAEEDDEEEEEEAKEAEDGPMME      | 4          | 1143.7390 | 1143.7239 | 0.0620 | iTRAQ4plex@N-term;<br>iTRAQ4plex(K)@30                                           | 99                     | 1938.73                | 443                 | 64.8    | 422.98              | 64.57   | 13.36               | 19.75   | 52.01               | 22.13   | 0.257                  | 0.030          | 0.123          | 34     | 33                | 71             |         |
| QEEAAEEDAEAEAEETETRAEEDDEEEEEEAKEAEDGPMEE      | 5          | 941.0002  | 940.9891  | 0.0555 | iTRAQ4plex@N-term;<br>iTRAQ4plex(K)@30                                           | 99                     | 4.20E+03               | 662.08              | 79.42   | 795.73              | 88.13   | 109.44              | 39.36   | 199.72              | 43.58   | 0.548                  | 0.165          | 0.251          | 34     | 33                | 72             |         |
| QEEAAEEDAEAEAEETETR                            | 3          | 761.0008  | 760.9951  | 0.0170 | iTRAQ4plex@N-term                                                                | 99                     | 49979.21               | 4756.81             | 212.34  | 4531.2              | 214.35  | 4306.63             | 209.66  | 3860.11             | 193.91  | 1.116                  | 0.905          | 0.852          | 34     | 33                | 52             |         |
| QEEAAEEDAEAEAEET                               | 2          | 883.3817  | 883.3721  | 0.0193 | iTRAQ4plex@N-term                                                                | 99                     | 420.82                 | 31.47               | 17.32   | 37.9                | 20      | 103.27              | 31.62   | 59.84               | 24.49   | 1.726                  | 3.282          | 1.579          | 34     | 33                | 48             |         |
| QEEAAEEDAEAEAEETE                              | 2          | 947.9067  | 947.8934  | 0.0267 | iTRAQ4plex@N-term                                                                | 99                     | 1116.61                | 46.97               | 21.21   | 68.07               | 26.45   | 144.07              | 37.41   | 74.21               | 27.38   | 1.941                  | 3.067          | 1.090          | 34     | 33                | 49             |         |
| EAAEEDAEAEAEETETRAEEDDEEEEEEAKEAEDGPMEE        | 5          | 915.3884  | 915.3774  | 0.0553 | iTRAQ4plex@N-term;<br>iTRAQ4plex(K)@29                                           | 99                     | 977.5                  | 172.98              | 40.49   | 164                 | 40.37   | 44.48               | 23.23   | 84.2                | 28.28   | 0.528                  | 0.257          | 0.513          | 35     | 34                | 72             |         |
| EAAEEDAEAEAEETETR                              | 3          | 718.3126  | 718.3089  | 0.0111 | iTRAQ4plex@N-term                                                                | 99                     | 13651.81               | 807.51              | 87.57   | 837.03              | 92.56   | 1187.54             | 109.16  | 1155.65             | 105.86  | 1.028                  | 1.471          | 1.381          | 35     | 34                | 52             |         |
| EAAEEDAEAEAEETETRAEEDDEEEEEEAKEAEDGPME         | 4          | 1079.4630 | 1079.4486 | 0.0577 | iTRAQ4plex@N-term;<br>iTRAQ4plex(K)@28                                           | 99                     | 1468.54                | 338.66              | 56.65   | 319.67              | 56.21   | 26.35               | 22.36   | 176.88              | 40.62   | 0.149                  | 0.078          | 0.553          | 36     | 35                | 71             |         |
| EAAEEDAEAEAEETETRAEEDDEEEEEEAKEA               | 4          | 947.1624  | 947.1525  | 0.0396 | iTRAQ4plex@N-term;<br>iTRAQ4plex(K)@28                                           | 99                     | 724.66                 | 99.49               | 30.82   | 127.97              | 35.35   | 28.13               | 20      | 166.18              | 39.37   | 0.169                  | 0.283          | 1.299          | 36     | 35                | 66             |         |
| EAAEEDAEAEAEETETRAEEDDEEEEEEAKEAEDGPMESKPKPRSF | 7          | 809.3823  | 809.3703  | 0.0843 | iTRAQ4plex@N-term;<br>iTRAQ4plex(K)@28;<br>iTRAQ4plex(K)@39;<br>iTRAQ4plex(K)@41 | 99                     | 1403.17                | 340.58              | 57.09   | 479.31              | 68.33   | 129.69              | 41.47   | 616.06              | 75.82   | 0.211                  | 0.381          | 1.285          | 36     | 35                | 80             |         |
| EAAEEDAEAEAEETETRAEEDDEEEEEEAKEAEDGPM          | 4          | 1047.2010 | 1047.1880 | 0.0520 | iTRAQ4plex@N-term;<br>iTRAQ4plex(K)@28                                           | 99                     | 855.49                 | 105.58              | 31.62   | 95.01               | 30.82   | 31.05               | 20      | 144.44              | 36.74   | 0.215                  | 0.294          | 1.520          | 36     | 35                | 70             |         |
| EAAEEDAEAEAEETETRAEEDDEEEEEEAKEAEDGPMEE        | 4          | 1111.7240 | 1111.7092 | 0.0610 | iTRAQ4plex@N-term;<br>iTRAQ4plex(K)@28                                           | 99                     | 4.40E+03               | 430.98              | 63.94   | 430.13              | 65.34   | 135.08              | 41.23   | 506.13              | 68.84   | 0.267                  | 0.313          | 1.177          | 36     | 35                | 72             |         |
| EAAEEDAEAEAEETETRAEEDDE                        | 3          | 866.3662  | 866.3586  | 0.0226 | iTRAQ4plex@N-term                                                                | 99                     | 550.99                 | 31.68               | 17.32   | 28.46               | 17.32   | 59.04               | 24.49   | 94.65               | 30      | 0.624                  | 1.864          | 3.326          | 36     | 35                | 57             |         |
| EAAEEDAEAEAEETETRAEEDDEEE                      | 3          | 952.3950  | 952.3871  | 0.0239 | iTRAQ4plex@N-term                                                                | 99                     | 785.65                 | 79.25               | 27.38   | 68.3                | 26.45   | 73.04               | 27.38   | 88.33               | 29.15   | 0.827                  | 0.922          | 1.293          | 36     | 35                | 59             |         |
| EAAEEDAEAEAEETETRAEEDDEEEEE                    | 3          | 995.4115  | 995.4012  | 0.0307 | iTRAQ4plex@N-term                                                                | 99                     | 779.19                 | 0                   | 0.61    | 28.42               | 17.32   | 122.31              | 34.64   | 134.91              | 36.05   | 0.907                  | #DIV/0!        | 4.747          | 36     | 35                | 60             |         |
| EAAEEDAEAEAEETE                                | 2          | 819.3516  | 819.3428  | 0.0177 | iTRAQ4plex@N-term                                                                | 99                     | 2020.13                | 29.14               | 16.73   | 46.33               | 21.91   | 114.18              | 33.46   | 96.08               | 30.66   | 1.188                  | 3.918          | 2.074          | 36     | 35                | 49             |         |
| EAAEEDAEAEAEETEETR                             | 3          | 675.2988  | 675.2947  | 0.0123 | iTRAQ4plex@N-term                                                                | 99                     | 64260.27               | 3122.91             | 172.2   | 3242.16             | 187.72  | 11297.5             | 331.6   | 9309.41             | 301.95  | 1.214                  | 3.618          | 2.871          | 36     | 35                | 52             |         |
| AAEEDAEAEAEETETRAEEDDEEEEEEAKEAEDGPMME         | 4          | 1047.2000 | 1047.1880 | 0.0500 | iTRAQ4plex@N-term;<br>iTRAQ4plex(K)@27                                           | 99                     | 2125.33                | 631.07              | 77.19   | 483.3               | 69.49   | 0                   | 21.04   | 151.7               | 37.41   | 0.000                  | 0.000          | 0.314          | 37     | 36                | 71             |         |
| AAEEDAEAEAEETETRAEEDDEEEEEEAKEAEDGPMESKPKPRSF  | 7          | 790.9426  | 790.9356  | 0.0490 | iTRAQ4plex@N-term;<br>iTRAQ4plex(K)@27;<br>iTRAQ4plex(K)@38;<br>iTRAQ4plex(K)@40 | 99                     | 5605.57                | 680.88              | 80.98   | 1173.5              | 106.14  | 106.87              | 43.01   | 479.49              | 67      | 0.223                  | 0.157          | 0.409          | 37     | 36                | 80             |         |
| AAEEDAEAEAEETETRAEEDDEEEEEEAKEAEDGPMEE         | 4          | 1079.4620 | 1079.4486 | 0.0533 | iTRAQ4plex@N-term;<br>iTRAQ4plex(K)@27                                           | 99                     | 7503.08                | 749.58              | 84.55   | 932.39              | 95.28   | 93.37               | 39.36   | 375.46              | 59.32   | 0.249                  | 0.125          | 0.403          | 37     | 36                | 72             |         |
| AAEEDAEAEAEETETRAEEDDEEEEEEAKEAEDGPM           | 4          | 1014.9410 | 1014.9273 | 0.0533 | iTRAQ4plex@N-term;<br>iTRAQ4plex(K)@27                                           | 99                     | 668.42                 | 178.1               | 41.23   | 226.22              | 46.9    | 20.55               | 18.71   | 74.63               | 26.45   | 0.275                  | 0.115          | 0.330          | 37     | 36                | 70             |         |
| AAEEDAEAEAEETETRAEEDDEEEEEEAKEA                | 4          | 914.9003  | 914.8919  | 0.0338 | iTRAQ4plex@N-term;<br>iTRAQ4plex(K)@27                                           | 99                     | 694.92                 | 122.26              | 34.35   | 220.41              | 46.15   | 74.46               | 29.32   | 115.36              | 33.16   | 0.645                  | 0.609          | 0.523          | 37     | 36                | 66             |         |
| AAEEDAEAEAEETEETR                              | 3          | 632.2856  | 632.2805  | 0.0152 | iTRAQ4plex@N-term                                                                | 99                     | 31342.87               | 2742.47             | 161.53  | 3109.98             | 177.34  | 3702.27             | 192.46  | 2611.82             | 160.64  | 1.418                  | 1.350          | 0.840          | 37     | 36                | 52             |         |
| AEEDAEAEAEETETRAEEDDEEEEEEAKEAEDGPMESKPKPRSF   | 6          | 910.7616  | 910.7509  | 0.0646 | iTRAQ4plex@N-term;<br>iTRAQ4plex(K)@26;<br>iTRAQ4plex(K)@37;<br>iTRAQ4plex(K)@39 | 99                     | 726.58                 | 187.03              | 42.18   | 212.88              | 45.6    | 12.34               | 16.73   | 107.56              | 31.62   | 0.115                  | 0.066          | 0.505          | 38     | 37                | 80             |         |
| AEEDAEAEAEETETRAEEDDEEEEEEAKEAEDGPMEE          | 4          | 1061.7020 | 1061.6893 | 0.0523 | iTRAQ4plex@N-term;<br>iTRAQ4plex(K)@26                                           | 99                     | 2313.17                | 426.22              | 63.87   | 599.66              | 76.21   | 69.79               | 33.16   | 277.24              | 50.99   | 0.252                  | 0.164          | 0.462          | 38     | 37                | 72             |         |
| AEEDAEAEAEETETRAEEDDEEEEEEAKEAEDGPMME          | 4          | 1029.4400 | 1029.4287 | 0.0461 | iTRAQ4plex@N-term;<br>iTRAQ4plex(K)@26                                           | 99                     | 821.01                 | 137.32              | 36.05   | 120.61              | 34.64   | 18.09               | 15.81   | 31.44               | 17.32   | 0.575                  | 0.132          | 0.261          | 38     | 37                | 71             |         |
| AEEDAEAEAEETEETR                               | 3          | 608.6056  | 608.6015  | 0.0123 | iTRAQ4plex@N-term                                                                | 99                     | 14385.59               | 926.82              | 93.85   | 999.7               | 101.67  | 1846.84             | 134.59  | 1192.68             | 108.91  | 1.548                  | 1.993          | 1.193          | 38     | 37                | 52             |         |
| EDAEAEAEETEETR                                 | 3          | 541.9209  | 541.9083  | 0.0379 | iTRAQ4plex@N-term                                                                | 99                     | 416.34                 | 136.99              | 36.05   | 136.2               | 37.41   | 202.94              | 44.71   | 114.61              | 33.91   | 1.771                  | 1.481          | 0.841          | 40     | 39                | 52             |         |



|                                        |   |          |          |        |                                                                                  |      |          |         |        |         |        |         |        |         |        |       |        |       |    |    |    |
|----------------------------------------|---|----------|----------|--------|----------------------------------------------------------------------------------|------|----------|---------|--------|---------|--------|---------|--------|---------|--------|-------|--------|-------|----|----|----|
| AEAEAETEETRAEEDDEEEEEEKAEDGPMEEKPKPRSF | 7 | 717.3424 | 717.3376 | 0.0339 | iTRAQ4plex@N-term;<br>iTRAQ4plex(K)@22;<br>iTRAQ4plex(K)@33;<br>iTRAQ4plex(K)@35 | 99   | 7256.59  | 1401.42 | 115.66 | 1796.28 | 133.85 | 1582.01 | 131.17 | 3896.87 | 191.66 | 0.406 | 1.129  | 2.169 | 42 | 41 | 80 |
| AEAEAETEETRAEEDDEEEEEEKAEDGPMEEKS      | 4 | 972.4189 | 972.4100 | 0.0355 | iTRAQ4plex@N-term;<br>iTRAQ4plex(K)@22                                           | 99   | 692.45   | 30.57   | 17.32  | 80      | 28.28  | 140.82  | 37.41  | 133.69  | 36.05  | 1.053 | 4.606  | 1.671 | 42 | 41 | 73 |
| AEAEAETEETRAEEDDEEEEEEKAEDGPMEEK       | 4 | 950.6606 | 950.6520 | 0.0343 | iTRAQ4plex@N-term;<br>iTRAQ4plex(K)@22                                           | 99   | 23813.87 | 1670.99 | 126.24 | 2078.79 | 147.66 | 5308.69 | 228.05 | 4426.59 | 208.09 | 1.199 | 3.177  | 2.129 | 42 | 41 | 72 |
| AEAEAETEETRAEEDDEEEEEE                 | 3 | 847.3561 | 847.3515 | 0.0137 | iTRAQ4plex@N-term                                                                | 98.2 | 478.62   | 52.72   | 22.36  | 51.08   | 23.45  | 154.29  | 38.72  | 111.64  | 33.16  | 1.382 | 2.927  | 2.186 | 42 | 41 | 62 |
| AEAEAETEETRAEEDDE                      | 3 | 651.6210 | 651.6157 | 0.0158 | iTRAQ4plex@N-term                                                                | 99   | 1033.4   | 135.78  | 35.91  | 143.12  | 39.74  | 582.59  | 75.02  | 410.07  | 63.63  | 1.421 | 4.291  | 2.865 | 42 | 41 | 57 |
| AEAEAETEETRAEEDDEEE                    | 3 | 737.6527 | 737.6441 | 0.0259 | iTRAQ4plex@N-term                                                                | 99   | 1051.14  | 36.37   | 18.71  | 60.6    | 26.45  | 388.99  | 61.06  | 252.73  | 50.09  | 1.539 | 10.695 | 4.170 | 42 | 41 | 59 |
| AEAEAETEETRAEEDDEEEEEEKAEDGPMEEK       | 4 | 918.3989 | 918.3914 | 0.0303 | iTRAQ4plex@N-term;<br>iTRAQ4plex(K)@22                                           | 99   | 4036.3   | 507.13  | 69.49  | 591.17  | 77.13  | 634.87  | 79.74  | 381.7   | 61.81  | 1.663 | 1.252  | 0.646 | 42 | 41 | 71 |
| AEAEAETEETRAEEDDEEEEEEKAEEK            | 4 | 786.1006 | 786.0953 | 0.0212 | iTRAQ4plex@N-term;<br>iTRAQ4plex(K)@22                                           | 99   | 1741.74  | 199.02  | 43.58  | 255.84  | 52.05  | 755.69  | 85.49  | 450.36  | 67.07  | 1.678 | 3.797  | 1.760 | 42 | 41 | 66 |
| AEAEAETEETRAEEDDEEEEEEKAEDGPMEEK       | 4 | 886.1376 | 886.1307 | 0.0275 | iTRAQ4plex@N-term;<br>iTRAQ4plex(K)@22                                           | 99   | 2369.82  | 200.41  | 43.7   | 240.05  | 50.98  | 870.15  | 91.53  | 503.68  | 71.07  | 1.728 | 4.342  | 2.098 | 42 | 41 | 70 |
| AEAEAETEETR                            | 2 | 690.3293 | 690.3240 | 0.0106 | iTRAQ4plex@N-term                                                                | 99   | 4102.18  | 232.18  | 47     | 265.51  | 56.29  | 1911.99 | 134.78 | 874.77  | 94.54  | 2.186 | 8.235  | 3.295 | 42 | 41 | 52 |
| AEAEAETEETRAEEDDEEE                    | 3 | 780.6638 | 780.6583 | 0.0166 | iTRAQ4plex@N-term                                                                | 99   | 1954.63  | 46.94   | 21.21  | 69.27   | 29.15  | 600.88  | 75.49  | 270.53  | 52.62  | 2.221 | 12.801 | 3.905 | 42 | 41 | 60 |
| AEAEETEETRAEEDDEEEEEEKAEDGPMEEKPKPRSF  | 6 | 803.3840 | 803.3793 | 0.0278 | iTRAQ4plex@N-term;<br>iTRAQ4plex(K)@20;<br>iTRAQ4plex(K)@31;<br>iTRAQ4plex(K)@33 | 99   | 1046.83  | 195.12  | 43.01  | 185.73  | 44.15  | 377.66  | 62.36  | 731.26  | 83.17  | 0.516 | 1.936  | 3.937 | 44 | 43 | 80 |
| AEAEETEETRAEEDDEEEEEEKAEDGPMEEK        | 4 | 900.6394 | 900.6321 | 0.0293 | iTRAQ4plex@N-term;<br>iTRAQ4plex(K)@20                                           | 99   | 3996.62  | 340.42  | 56.82  | 335.75  | 60.32  | 1106.14 | 103.67 | 836.53  | 90.72  | 1.322 | 3.249  | 2.492 | 44 | 43 | 72 |
| AEAEETEETRAEEDDEEEEEEKAEEK             | 4 | 736.0788 | 736.0754 | 0.0137 | iTRAQ4plex@N-term;<br>iTRAQ4plex(K)@20                                           | 99   | 563.08   | 51.47   | 22.36  | 109.17  | 33.91  | 366.71  | 59.41  | 198.59  | 44.72  | 1.847 | 7.125  | 1.819 | 44 | 43 | 66 |
| AEAEETEETR                             | 2 | 590.2864 | 590.2841 | 0.0045 | iTRAQ4plex@N-term                                                                | 99   | 462.31   | 29.51   | 16.73  | 28.95   | 18.97  | 247.27  | 48.47  | 121.07  | 35.07  | 2.042 | 8.379  | 4.182 | 44 | 43 | 52 |
| AEAEETEETRAEEDDEEEEEEKAEDGPMEEK        | 4 | 836.1137 | 836.1108 | 0.0117 | iTRAQ4plex@N-term;<br>iTRAQ4plex(K)@20                                           | 98.4 | 417.86   | 95.85   | 30     | 47.35   | 24.49  | 349.95  | 57.61  | 145.18  | 38.73  | 2.410 | 3.651  | 3.066 | 44 | 43 | 70 |
| AEAEETEETRAEEDDEEEEEEKAEDGPMEEK        | 4 | 868.3854 | 868.3714 | 0.0558 | iTRAQ4plex@N-term;<br>iTRAQ4plex(K)@20                                           | 99   | 461.92   | 137.1   | 36.05  | 130.93  | 36.74  | 199.96  | 44.15  | 65.85   | 26.45  | 3.037 | 1.458  | 0.503 | 44 | 43 | 71 |
| EAETEETRAEEDDEEEEEEKAEDGPMEEK          | 4 | 882.8912 | 882.8728 | 0.0735 | iTRAQ4plex@N-term;<br>iTRAQ4plex(K)@19                                           | 99   | 633.28   | 90.68   | 29.32  | 87.48   | 30.98  | 323     | 55.85  | 211.69  | 45.82  | 1.526 | 3.562  | 2.420 | 45 | 44 | 72 |
| AETEETRAEEDDEEEEEEKAEDGPMEEKPKPRSF     | 6 | 770.0386 | 770.0327 | 0.0351 | iTRAQ4plex@N-term;<br>iTRAQ4plex(K)@18;<br>iTRAQ4plex(K)@29;<br>iTRAQ4plex(K)@31 | 99   | 2618.61  | 485.19  | 67.81  | 460.37  | 69.49  | 904.92  | 97.71  | 2302.33 | 147.15 | 0.393 | 1.865  | 5.001 | 46 | 45 | 80 |
| AETEETRAEEDDEEEEEEKAEDGPMEEK           | 4 | 850.6201 | 850.6121 | 0.0319 | iTRAQ4plex@N-term;<br>iTRAQ4plex(K)@18                                           | 99   | 6684.81  | 448.98  | 65.34  | 495.4   | 73.2   | 1706.28 | 128.36 | 1069.33 | 103.2  | 1.596 | 3.800  | 2.159 | 46 | 45 | 72 |
| AETEETRAEEDDEEEEEEKAEDGPMEEK           | 4 | 818.3576 | 818.3515 | 0.0244 | iTRAQ4plex@N-term;<br>iTRAQ4plex(K)@18                                           | 99   | 1518.14  | 200.29  | 43.58  | 195.54  | 44.83  | 284.25  | 53     | 175.27  | 41.83  | 1.622 | 1.419  | 0.896 | 46 | 45 | 71 |
| AETEETRAEEDDEEEEEEKAEEK                | 4 | 686.0613 | 686.0554 | 0.0234 | iTRAQ4plex@N-term;<br>iTRAQ4plex(K)@18                                           | 99   | 513.54   | 52.01   | 22.36  | 83.98   | 30     | 310.42  | 54.4   | 109.2   | 33.91  | 2.843 | 5.968  | 1.300 | 46 | 45 | 66 |
| TEETRAEEDDEEEEEEKAEDGPMEEK             | 4 | 800.5977 | 800.5922 | 0.0220 | iTRAQ4plex@N-term;<br>iTRAQ4plex(K)@16                                           | 99   | 1095.11  | 105.69  | 31.62  | 90.69   | 31.62  | 328.44  | 56.29  | 205.89  | 45.27  | 1.595 | 3.108  | 2.270 | 48 | 47 | 72 |
| EETRAEEDDEEEEEEKAEDGPMEEKPKPRSF        | 6 | 719.8503 | 719.8448 | 0.0328 | iTRAQ4plex@N-term;<br>iTRAQ4plex(K)@15;<br>iTRAQ4plex(K)@26;<br>iTRAQ4plex(K)@28 | 99   | 1700.24  | 156.27  | 38.72  | 240.38  | 50.09  | 630.74  | 79.74  | 985.41  | 96.84  | 0.640 | 4.036  | 4.099 | 49 | 48 | 80 |
| ETRAEEDDEEEEEEKAEDGPMEEKPKPRSF         | 6 | 698.3424 | 698.3377 | 0.0281 | iTRAQ4plex@N-term;<br>iTRAQ4plex(K)@14;<br>iTRAQ4plex(K)@25;<br>iTRAQ4plex(K)@27 | 99   | 5606.1   | 609.57  | 76.47  | 936.01  | 97.81  | 1777.2  | 135.88 | 3781.6  | 189.03 | 0.470 | 2.915  | 4.040 | 50 | 49 | 80 |
| ETRAEEDDEEEEEEKAEDGPMEEK               | 4 | 678.5513 | 678.5483 | 0.0117 | iTRAQ4plex@N-term;<br>iTRAQ4plex(K)@14                                           | 99   | 1683.31  | 104.34  | 31.62  | 153.7   | 40.12  | 420.72  | 64.18  | 361.23  | 59.41  | 1.165 | 4.032  | 2.350 | 50 | 49 | 70 |
| ETRAEEDDEEEEEEKAEDGPMEEK               | 4 | 743.0740 | 743.0696 | 0.0173 | iTRAQ4plex@N-term;<br>iTRAQ4plex(K)@14                                           | 99   | 13255.46 | 506.91  | 69.63  | 701.37  | 85.49  | 1744.68 | 130.67 | 1391.13 | 116.79 | 1.254 | 3.442  | 1.983 | 50 | 49 | 72 |
| ETRAEEDDEEEEEEKAEDGPMEEK               | 4 | 710.8138 | 710.8090 | 0.0191 | iTRAQ4plex@N-term;<br>iTRAQ4plex(K)@14                                           | 99   | 2952.8   | 230.36  | 47     | 349.93  | 58.81  | 307.38  | 55.85  | 198.02  | 44.38  | 1.552 | 1.334  | 0.566 | 50 | 49 | 71 |
| ETRAEEDDEEEEEEKAEEK                    | 4 | 578.5145 | 578.5129 | 0.0063 | iTRAQ4plex@N-term;<br>iTRAQ4plex(K)@14                                           | 99   | 874.23   | 72.65   | 26.45  | 125.21  | 36.05  | 332.62  | 56.65  | 162.49  | 40.61  | 2.047 | 4.578  | 1.298 | 50 | 49 | 66 |
| TRAEEDEEEEEEKAEDGPMEEKPKPRSF           | 6 | 676.8337 | 676.8306 | 0.0183 | iTRAQ4plex@N-term;<br>iTRAQ4plex(K)@13;<br>iTRAQ4plex(K)@24;<br>iTRAQ4plex(K)@26 | 99   | 2024.87  | 222.99  | 45.82  | 140.81  | 39.99  | 533.42  | 73.2   | 870.05  | 91     | 0.613 | 2.392  | 6.179 | 51 | 50 | 80 |

Table S1

|                              |   |          |          |        |                                                                                  |      |          |         |        |         |        |         |        |         |        |       |        |       |    |    |    |
|------------------------------|---|----------|----------|--------|----------------------------------------------------------------------------------|------|----------|---------|--------|---------|--------|---------|--------|---------|--------|-------|--------|-------|----|----|----|
| TRAEEEEEEAKEAE               | 4 | 546.2877 | 546.2523 | 0.1417 | iTRAQ4plex@N-term;<br>iTRAQ4plex(K)@13                                           | 98.7 | 272.48   | 99.77   | 30.98  | 166.07  | 40.98  | 285.08  | 53.28  | 277.2   | 51.86  | 1.028 | 2.857  | 1.669 | 51 | 50 | 66 |
| TRAEEEEEEAKEAEDGPMEE         | 4 | 678.5553 | 678.5483 | 0.0278 | iTRAQ4plex@N-term;<br>iTRAQ4plex(K)@13                                           | 99   | 698.22   | 102.78  | 31.62  | 226.13  | 46.9   | 169.28  | 41.83  | 142.97  | 37.41  | 1.184 | 1.647  | 0.632 | 51 | 50 | 71 |
| TRAEEEEEEAKEAEDGPMEE         | 4 | 710.8138 | 710.8090 | 0.0191 | iTRAQ4plex@N-term;<br>iTRAQ4plex(K)@13                                           | 99   | 6758.27  | 220.84  | 45.93  | 290.74  | 54.95  | 675.56  | 80.92  | 351.48  | 59.57  | 1.922 | 3.059  | 1.209 | 51 | 50 | 72 |
| RAEEEEEEAKEAEDGPMEEESKPKPRSF | 6 | 659.9934 | 659.9893 | 0.0244 | iTRAQ4plex@N-term;<br>iTRAQ4plex(K)@12;<br>iTRAQ4plex(K)@23;<br>iTRAQ4plex(K)@25 | 99   | 1117.97  | 168.07  | 39.99  | 192.34  | 44.71  | 395.77  | 63.55  | 680.22  | 80.36  | 0.582 | 2.355  | 3.537 | 52 | 51 | 80 |
| RAEEEEEEAKEAEDGPMEE          | 4 | 685.5495 | 685.5471 | 0.0097 | iTRAQ4plex@N-term;<br>iTRAQ4plex(K)@12                                           | 99   | 4283.3   | 178.24  | 41.23  | 220.83  | 48.06  | 544.1   | 72.72  | 338.25  | 58.04  | 1.609 | 3.053  | 1.532 | 52 | 51 | 72 |
| AEEEEEEEAKEAEDGPMEEESKPKPR   | 6 | 594.9570 | 594.9557 | 0.0073 | iTRAQ4plex@N-term;<br>iTRAQ4plex(K)@11;<br>iTRAQ4plex(K)@22;<br>iTRAQ4plex(K)@24 | 99   | 4551.77  | 559.28  | 73.13  | 771.3   | 88.98  | 1463.14 | 123.43 | 3194.27 | 173.66 | 0.458 | 2.616  | 4.141 | 53 | 52 | 78 |
| AEEEEEEEAKEAEDGPMEEESKPKPRSF | 5 | 760.5712 | 760.5656 | 0.0285 | iTRAQ4plex@N-term;<br>iTRAQ4plex(K)@11;<br>iTRAQ4plex(K)@22;<br>iTRAQ4plex(K)@24 | 99   | 88559.18 | 8907.22 | 291.15 | 10191.1 | 321.56 | 12824.4 | 367.29 | 26401.4 | 501.05 | 0.486 | 1.440  | 2.591 | 53 | 52 | 80 |
| AEEEEEEEAKEAEDGPMEEESKPKPRSF | 5 | 731.1567 | 731.1519 | 0.0241 | iTRAQ4plex@N-term;<br>iTRAQ4plex(K)@11;<br>iTRAQ4plex(K)@22;<br>iTRAQ4plex(K)@24 | 99   | 2465.6   | 496.64  | 68.91  | 681.02  | 82.21  | 571.41  | 77.83  | 972.3   | 96.11  | 0.588 | 1.151  | 1.428 | 53 | 52 | 79 |
| AEEEEEEEAKEAED               | 3 | 680.6312 | 680.6267 | 0.0136 | iTRAQ4plex@N-term;<br>iTRAQ4plex(K)@11                                           | 99   | 1202.36  | 125.95  | 34.78  | 199.76  | 44.94  | 330.14  | 57.26  | 287.95  | 53     | 1.147 | 2.621  | 1.441 | 53 | 52 | 67 |
| AEEEEEEEAKEA                 | 3 | 599.2715 | 599.2701 | 0.0039 | iTRAQ4plex@N-term;<br>iTRAQ4plex(K)@11                                           | 99   | 740.48   | 104.69  | 31.62  | 137.51  | 38.07  | 387.7   | 61.39  | 271.4   | 51.76  | 1.429 | 3.703  | 1.974 | 53 | 52 | 65 |
| AEEEEEEEAKEAEDGPMEEES        | 3 | 890.7123 | 890.7040 | 0.0249 | iTRAQ4plex@N-term;<br>iTRAQ4plex(K)@11                                           | 99   | 6953.63  | 872.23  | 90.98  | 885.12  | 95.64  | 1518.66 | 122.25 | 1011.27 | 100.14 | 1.502 | 1.741  | 1.143 | 53 | 52 | 73 |
| AEEEEEEEAKEAEDGPMEE          | 3 | 861.7006 | 861.6933 | 0.0219 | iTRAQ4plex@N-term;<br>iTRAQ4plex(K)@11                                           | 99   | 150313.9 | 18025.5 | 413.96 | 19710.5 | 453.77 | 43733.5 | 653.34 | 28694.1 | 534.75 | 1.524 | 2.426  | 1.456 | 53 | 52 | 72 |
| AEEEEEEEAKEAEDGPM            | 3 | 775.6702 | 775.6649 | 0.0159 | iTRAQ4plex@N-term;<br>iTRAQ4plex(K)@11                                           | 99   | 29119.96 | 1453.85 | 117.63 | 1669.54 | 132.61 | 4317.58 | 204.76 | 2705.35 | 164.3  | 1.596 | 2.970  | 1.620 | 53 | 52 | 70 |
| AEEEEEEEAKEAEDGPMEE          | 3 | 818.6857 | 818.6791 | 0.0198 | iTRAQ4plex@N-term;<br>iTRAQ4plex(K)@11                                           | 99   | 51730.09 | 5207.87 | 222.45 | 5596.42 | 236.21 | 3537.7  | 191.73 | 2110.13 | 145.51 | 1.677 | 0.679  | 0.377 | 53 | 52 | 71 |
| AEEEEEEEAKEAE                | 3 | 642.2900 | 642.2844 | 0.0168 | iTRAQ4plex@N-term;<br>iTRAQ4plex(K)@11                                           | 99   | 8030.67  | 885.61  | 92.07  | 1264.25 | 115.61 | 3871.13 | 192.79 | 1712.64 | 132.5  | 2.260 | 4.371  | 1.355 | 53 | 52 | 66 |
| EEEEEEAKEAEDGPMEE            | 3 | 838.0193 | 838.0143 | 0.0150 | iTRAQ4plex@N-term;<br>iTRAQ4plex(K)@10                                           | 99   | 620.24   | 176.94  | 41.23  | 280.39  | 53.1   | 411.12  | 64.26  | 426.89  | 64.26  | 0.963 | 2.323  | 1.522 | 54 | 53 | 72 |
| EEEEAKEAEDGPMEEESKPKPRSF     | 5 | 645.9294 | 645.9272 | 0.0111 | iTRAQ4plex@N-term;<br>iTRAQ4plex(K)@6;<br>iTRAQ4plex(K)@17;<br>iTRAQ4plex(K)@19  | 99   | 3487.92  | 290.88  | 52.81  | 436.95  | 66.92  | 860.66  | 94.27  | 1717.64 | 127.46 | 0.501 | 2.959  | 3.931 | 58 | 57 | 80 |
| EEEEAKEAEDGPMEE              | 3 | 627.6194 | 627.6152 | 0.0126 | iTRAQ4plex@N-term;<br>iTRAQ4plex(K)@6                                            | 98   | 383.81   | 72.93   | 26.45  | 112.12  | 33.91  | 235.43  | 47.95  | 150.89  | 38.72  | 1.560 | 3.228  | 1.346 | 58 | 57 | 71 |
| EEEEAKEAEDGPMEE              | 3 | 670.6310 | 670.6294 | 0.0048 | iTRAQ4plex@N-term;<br>iTRAQ4plex(K)@6                                            | 99   | 3380.44  | 109.5   | 32.4   | 163.35  | 45.38  | 1595.04 | 123.27 | 920.87  | 96.09  | 1.732 | 14.567 | 5.637 | 58 | 57 | 72 |
| EEAKEAEDGPMEEESKPKPRSF       | 5 | 594.3119 | 594.3101 | 0.0088 | iTRAQ4plex@N-term;<br>iTRAQ4plex(K)@4;<br>iTRAQ4plex(K)@15;<br>iTRAQ4plex(K)@17  | 99   | 7702.38  | 331.53  | 56.65  | 650.89  | 80.98  | 1141.37 | 107.18 | 1431.41 | 117.16 | 0.797 | 3.443  | 2.199 | 60 | 59 | 80 |
| EEAKEAEDGPMEE                | 3 | 584.6033 | 584.6010 | 0.0069 | iTRAQ4plex@N-term;<br>iTRAQ4plex(K)@4                                            | 99   | 1899.77  | 126.68  | 34.64  | 115     | 36.05  | 533.01  | 71.75  | 395.16  | 62.36  | 1.349 | 4.208  | 3.436 | 60 | 59 | 72 |
| EAKEAEDGPMEEESKPKPRSF        | 5 | 568.5039 | 568.5016 | 0.0115 | iTRAQ4plex@N-term;<br>iTRAQ4plex(K)@3;<br>iTRAQ4plex(K)@14;<br>iTRAQ4plex(K)@16  | 99   | 13768    | 1219.83 | 107.83 | 1482.2  | 126.95 | 5546.78 | 233.05 | 5559.26 | 232.03 | 0.998 | 4.547  | 3.751 | 61 | 60 | 80 |
| KEAEDGPMEEESKPKPRSF          | 5 | 528.4879 | 528.4857 | 0.0112 | iTRAQ4plex@N-term;<br>iTRAQ4plex(K)@1;<br>iTRAQ4plex(K)@12;<br>iTRAQ4plex(K)@14  | 99   | 4297.12  | 973.87  | 96.32  | 1158.66 | 109.07 | 2039.87 | 142.39 | 1909.2  | 136.31 | 1.068 | 2.095  | 1.648 | 63 | 62 | 80 |
| EAEDGPMEEESKPKPRSF           | 4 | 592.3072 | 592.3060 | 0.0047 | iTRAQ4plex@N-term;<br>iTRAQ4plex(K)@11;<br>iTRAQ4plex(K)@13                      | 99   | 398.94   | 92.95   | 30     | 182.13  | 42.42  | 205.4   | 45.82  | 245.53  | 48.57  | 0.837 | 2.210  | 1.348 | 64 | 63 | 80 |

Table S1

|                           |   |          |          |         |                                                                                  |      |          |         |        |         |        |         |        |         |        |       |       |        |     |     |     |
|---------------------------|---|----------|----------|---------|----------------------------------------------------------------------------------|------|----------|---------|--------|---------|--------|---------|--------|---------|--------|-------|-------|--------|-----|-----|-----|
| AEDGPMEEKPKPRSF           | 4 | 560.0480 | 560.0453 | 0.0105  | iTRAQ4plex@N-term;<br>iTRAQ4plex(K)@10;<br>iTRAQ4plex(K)@12                      | 99   | 564.79   | 158.23  | 38.72  | 149.16  | 39.49  | 290.74  | 53.66  | 267.16  | 50.98  | 1.088 | 1.837 | 1.791  | 65  | 64  | 80  |
| EDGPMEEKPKPRSF            | 4 | 542.2877 | 542.2861 | 0.0066  | iTRAQ4plex@N-term;<br>iTRAQ4plex(K)@9;<br>iTRAQ4plex(K)@11                       | 99   | 3561.12  | 486.97  | 67.96  | 477.79  | 71.68  | 1429.61 | 118.47 | 1382.66 | 115.78 | 1.034 | 2.936 | 2.894  | 66  | 65  | 80  |
| DGPMEEKPKPRSF             | 4 | 510.0276 | 510.0254 | 0.0086  | iTRAQ4plex@N-term;<br>iTRAQ4plex(K)@8;<br>iTRAQ4plex(K)@10                       | 99   | 22736.96 | 7540.56 | 268.12 | 9288.15 | 307.93 | 15119.6 | 387.86 | 13557.9 | 363.35 | 1.115 | 2.005 | 1.460  | 67  | 66  | 80  |
| GPMEESKPKPRSF             | 4 | 481.2684 | 481.2687 | -0.0012 | iTRAQ4plex@N-term;<br>iTRAQ4plex(K)@7;<br>iTRAQ4plex(K)@9                        | 99   | 4938.27  | 2106.93 | 141.4  | 2127.27 | 147.56 | 2929.11 | 170.97 | 2354.13 | 151.87 | 1.244 | 1.390 | 1.107  | 68  | 67  | 80  |
| MPNLVPPKIPDGER            | 3 | 617.6872 | 617.6849 | 0.0070  | iTRAQ4plex@N-term;<br>iTRAQ4plex(K)@8                                            | 99   | 1507.71  | 291.69  | 52.62  | 301.11  | 56.82  | 905.79  | 93.9   | 690.15  | 82.33  | 1.312 | 3.105 | 2.292  | 81  | 80  | 94  |
| MPNLVPPKIPDGERVDFDDIH     | 4 | 673.8616 | 673.8557 | 0.0238  | iTRAQ4plex@N-term;<br>iTRAQ4plex(K)@8                                            | 99   | 48922.52 | 7473.09 | 266.21 | 7322.62 | 273.55 | 9312.88 | 304.37 | 5924.08 | 242.95 | 1.572 | 1.246 | 0.809  | 81  | 80  | 101 |
| LVPPKIPDGERVDFDDIH        | 4 | 588.3235 | 588.3216 | 0.0076  | iTRAQ4plex@N-term;<br>iTRAQ4plex(K)@5                                            | 99   | 7654.75  | 2043.53 | 139.23 | 2027.98 | 144.03 | 2709.51 | 163.5  | 1319.55 | 115.9  | 2.053 | 1.326 | 0.651  | 84  | 83  | 101 |
| VPPKIPDGERVDFDDIHRKRMEKDL | 6 | 597.8391 | 597.8345 | 0.0275  | iTRAQ4plex@N-term;<br>iTRAQ4plex(K)@4;<br>iTRAQ4plex(K)@19;<br>iTRAQ4plex(K)@23  | 98.2 | 16277.11 | 7824.28 | 273.13 | 9641.44 | 309.31 | 6603.83 | 266.53 | 11212.8 | 326.41 | 0.589 | 0.844 | 1.163  | 85  | 84  | 109 |
| VPPKIPDGERVDFDDIHRKRME    | 6 | 514.4512 | 514.4498 | 0.0079  | iTRAQ4plex@N-term;<br>iTRAQ4plex(K)@4;<br>iTRAQ4plex(K)@19                       | 98.5 | 12714.19 | 5055.72 | 219.06 | 5149.47 | 229.05 | 6335.78 | 253.34 | 6682.38 | 254.16 | 0.948 | 1.253 | 1.298  | 85  | 84  | 106 |
| VPPKIPDGERVDFDDIHRKR      | 5 | 565.1247 | 565.1218 | 0.0147  | iTRAQ4plex@N-term;<br>iTRAQ4plex(K)@4;<br>iTRAQ4plex(K)@19                       | 99   | 9631.63  | 4331.64 | 202.5  | 3888.25 | 199.72 | 4744.87 | 217.68 | 3233.72 | 178.95 | 1.467 | 1.095 | 0.832  | 85  | 84  | 104 |
| VPPKIPDGERVDFDDIH         | 4 | 560.0532 | 560.0506 | 0.0106  | iTRAQ4plex@N-term;<br>iTRAQ4plex(K)@4                                            | 99   | 75156.03 | 18565.5 | 419.73 | 18690.7 | 436.48 | 23248.9 | 480.27 | 12683.5 | 357.67 | 1.833 | 1.252 | 0.679  | 85  | 84  | 101 |
| VDFDDIHRKRMEKDLN          | 4 | 616.5870 | 616.5839 | 0.0122  | iTRAQ4plex@N-term;<br>iTRAQ4plex(K)@9;<br>iTRAQ4plex(K)@13                       | 98.9 | 4886.59  | 671.24  | 79.86  | 719.01  | 89.32  | 3089.27 | 172.57 | 2073.15 | 143.31 | 1.490 | 4.602 | 2.883  | 95  | 94  | 110 |
| MEKDLNELQALIE             | 3 | 612.0038 | 612.0005 | 0.0098  | iTRAQ4plex@N-term;<br>iTRAQ4plex(K)@3                                            | 99   | 973.08   | 150.41  | 37.81  | 162.71  | 39.99  | 29.65   | 19.75  | 54.72   | 22.8   | 0.542 | 0.197 | 0.336  | 105 | 104 | 117 |
| KDLNELQALIEAHFEN          | 3 | 724.7286 | 724.7228 | 0.0173  | iTRAQ4plex@N-term;<br>iTRAQ4plex(K)@1                                            | 99   | 507.05   | 31.62   | 17.32  | 31.32   | 17.89  | 35.12   | 20.25  | 168.31  | 39.62  | 0.209 | 1.111 | 5.374  | 107 | 106 | 122 |
| KDLNELQALIEAHF            | 3 | 643.6989 | 643.6943 | 0.0138  | iTRAQ4plex@N-term;<br>iTRAQ4plex(K)@1                                            | 99   | 1025.08  | 196.52  | 43.12  | 171.31  | 41.23  | 8.75    | 13.78  | 23.23   | 14.83  | 0.377 | 0.045 | 0.136  | 107 | 106 | 120 |
| KDLNELQALIEAH             | 3 | 594.6741 | 594.6715 | 0.0077  | iTRAQ4plex@N-term;<br>iTRAQ4plex(K)@1                                            | 99   | 1396.29  | 317.75  | 55.04  | 390.89  | 61.8   | 75.68   | 31.62  | 188.71  | 42.18  | 0.401 | 0.238 | 0.483  | 107 | 106 | 119 |
| NELQALIEAHF               | 2 | 714.8889 | 714.8838 | 0.0102  | iTRAQ4plex@N-term                                                                | 99   | 5022.4   | 901.53  | 92.45  | 874.5   | 92.72  | 0       | 25.81  | 125.41  | 34.05  | 0.000 | 0.000 | 0.143  | 110 | 109 | 120 |
| NELQALIEAHFEN             | 3 | 557.9557 | 557.9535 | 0.0067  | iTRAQ4plex@N-term                                                                | 99   | 2119.63  | 104.09  | 31.46  | 114.59  | 33.76  | 48.3    | 27.74  | 643.85  | 77.26  | 0.075 | 0.464 | 5.619  | 110 | 109 | 122 |
| NELQALIEAH                | 2 | 641.3521 | 641.3496 | 0.0050  | iTRAQ4plex@N-term                                                                | 99   | 1464.12  | 280.42  | 51.66  | 322.87  | 56.21  | 41.84   | 25.49  | 192.55  | 42.42  | 0.217 | 0.149 | 0.596  | 110 | 109 | 119 |
| NELQALIEAHFE              | 3 | 519.9394 | 519.9391 | 0.0007  | iTRAQ4plex@N-term                                                                | 98.1 | 380.77   | 114.26  | 32.86  | 92.89   | 30.49  | 16.09   | 14.83  | 42.48   | 20     | 0.379 | 0.141 | 0.457  | 110 | 109 | 121 |
| NELQALIEAHFENRK           | 4 | 525.7922 | 525.7914 | 0.0029  | iTRAQ4plex@N-term;<br>iTRAQ4plex(K)@15                                           | 99   | 4257.92  | 950.89  | 96.37  | 2278.76 | 146.98 | 49.22   | 42.42  | 125.17  | 34.64  | 0.393 | 0.052 | 0.055  | 110 | 109 | 124 |
| ELQALIEAHFE               | 2 | 722.3887 | 722.3837 | 0.0101  | iTRAQ4plex@N-term                                                                | 99   | 2638.85  | 416.37  | 62.84  | 407.81  | 63.32  | 0       | 16.83  | 169.73  | 39.62  | 0.000 | 0.000 | 0.416  | 111 | 110 | 121 |
| ELQALIEAHFENRK            | 4 | 497.2813 | 497.2807 | 0.0023  | iTRAQ4plex@N-term;<br>iTRAQ4plex(K)@14                                           | 99   | 14173.12 | 5798.91 | 235.87 | 8876.82 | 292.07 | 0       | 114.51 | 367.53  | 58.64  | 0.000 | 0.000 | 0.041  | 111 | 110 | 124 |
| ELQALIEAH                 | 2 | 584.3286 | 584.3281 | 0.0010  | iTRAQ4plex@N-term                                                                | 99   | 13123.82 | 2188.36 | 144.24 | 2399.5  | 153.31 | 191.47  | 60.98  | 1408.72 | 114.54 | 0.136 | 0.087 | 0.587  | 111 | 110 | 119 |
| ELQALIEAHFENRKEEEELV      | 4 | 747.4169 | 747.4107 | 0.0247  | iTRAQ4plex@N-term;<br>iTRAQ4plex(K)@14;<br>iTRAQ4plex(K)@15                      | 99   | 446.07   | 121.31  | 34.2   | 215.2   | 45.38  | 6.86    | 13.78  | 9.17    | 9.49   | 0.748 | 0.057 | 0.043  | 111 | 110 | 131 |
| QALIEAHFENRK              | 4 | 436.7467 | 436.7491 | -0.0094 | iTRAQ4plex@N-term;<br>iTRAQ4plex(K)@12                                           | 98   | 3467.37  | 869     | 90.6   | 683.08  | 83.47  | 488.92  | 71.75  | 581.49  | 74.83  | 0.841 | 0.563 | 0.851  | 113 | 112 | 124 |
| QALIEAHFEN                | 2 | 658.3440 | 658.3418 | 0.0044  | iTRAQ4plex@N-term                                                                | 99   | 5889.74  | 177.49  | 40.98  | 154.7   | 45.27  | 1664.79 | 127.22 | 1793.27 | 131.56 | 0.928 | 9.380 | 11.592 | 113 | 112 | 122 |
| ALIEAHFENRKEEEELVSLKDRIE  | 5 | 721.2123 | 721.2065 | 0.0288  | iTRAQ4plex@N-term;<br>iTRAQ4plex(K)@11;<br>iTRAQ4plex(K)@12;<br>iTRAQ4plex(K)@21 | 99   | 4055.8   | 976.04  | 96.47  | 1210.01 | 108.47 | 60.29   | 39.49  | 764.62  | 84.25  | 0.079 | 0.062 | 0.632  | 114 | 113 | 138 |
| ALIEAHFENRKEEEELVSLKDR    | 5 | 672.7847 | 672.7812 | 0.0177  | iTRAQ4plex@N-term;<br>iTRAQ4plex(K)@11;<br>iTRAQ4plex(K)@12;<br>iTRAQ4plex(K)@21 | 99   | 4720.24  | 897.09  | 92.67  | 1281    | 111.65 | 278.43  | 68.18  | 3356.24 | 176.52 | 0.083 | 0.310 | 2.620  | 114 | 113 | 136 |

Table S1

|                        |   |          |          |         |                                                                                |      |          |         |        |         |        |         |        |         |        |       |        |        |     |     |     |
|------------------------|---|----------|----------|---------|--------------------------------------------------------------------------------|------|----------|---------|--------|---------|--------|---------|--------|---------|--------|-------|--------|--------|-----|-----|-----|
| ALIEAHFENRKKEEEEELVSL  | 4 | 704.9005 | 704.8934 | 0.0284  | iTRAQ4plex@N-term;<br>iTRAQ4plex(K)@11;<br>iTRAQ4plex(K)@12                    | 99   | 1844.88  | 71.23   | 26.07  | 91.03   | 32.09  | 454.01  | 68.62  | 1156.37 | 104.29 | 0.393 | 6.374  | 12.703 | 114 | 113 | 133 |
| ALIEAHFENRKKEEEEELVS   | 5 | 541.5001 | 541.4994 | 0.0038  | iTRAQ4plex@N-term;<br>iTRAQ4plex(K)@11;<br>iTRAQ4plex(K)@12                    | 99   | 4.59E+03 | 1023.47 | 98.93  | 1410.69 | 118.05 | 989.5   | 103.43 | 1866.55 | 132.99 | 0.530 | 0.967  | 1.323  | 114 | 113 | 132 |
| ALIEAHFENRKKEEEEELV    | 4 | 654.8692 | 654.8644 | 0.0193  | iTRAQ4plex@N-term;<br>iTRAQ4plex(K)@11;<br>iTRAQ4plex(K)@12                    | 99   | 19394.16 | 3797.31 | 189.71 | 3605.42 | 193.05 | 5576.18 | 239.07 | 8879.23 | 290.77 | 0.628 | 1.468  | 2.463  | 114 | 113 | 131 |
| ALIEAHFENRKKEEEEEL     | 5 | 504.2808 | 504.2793 | 0.0076  | iTRAQ4plex@N-term;<br>iTRAQ4plex(K)@11;<br>iTRAQ4plex(K)@12                    | 99   | 7564.69  | 1284.72 | 110.57 | 1473.13 | 124.08 | 3330.39 | 182.89 | 4591.95 | 209.54 | 0.725 | 2.592  | 3.117  | 114 | 113 | 130 |
| ALIEAHFENRKKKEE        | 4 | 537.3061 | 537.3050 | 0.0045  | iTRAQ4plex@N-term;<br>iTRAQ4plex(K)@11;<br>iTRAQ4plex(K)@12                    | 99   | 45468.57 | 3359.27 | 178.69 | 3646.65 | 203.61 | 18604.8 | 428.82 | 24810.8 | 487.64 | 0.750 | 5.538  | 6.804  | 114 | 113 | 127 |
| ALIEAHFENRKK           | 4 | 472.7841 | 472.7837 | 0.0017  | iTRAQ4plex@N-term;<br>iTRAQ4plex(K)@11;<br>iTRAQ4plex(K)@12                    | 99   | 9822.04  | 1116.53 | 102.94 | 1131.19 | 111.43 | 4217.33 | 204.49 | 5517.48 | 230.13 | 0.764 | 3.777  | 4.878  | 114 | 113 | 125 |
| ALIEAHFENRKKEEEE       | 4 | 601.8303 | 601.8263 | 0.0162  | iTRAQ4plex@N-term;<br>iTRAQ4plex(K)@11;<br>iTRAQ4plex(K)@12                    | 99   | 6839.03  | 157.71  | 38.72  | 174.45  | 53.1   | 3576.78 | 186.79 | 4374.45 | 204.89 | 0.818 | 22.679 | 25.076 | 114 | 113 | 129 |
| ALIEAHFENRK            | 3 | 539.3130 | 539.3101 | 0.0086  | iTRAQ4plex@N-term;<br>iTRAQ4plex(K)@11                                         | 98.1 | 28804.01 | 11722.3 | 333.48 | 11690.1 | 340.22 | 3089.46 | 191.86 | 3732.72 | 189.79 | 0.828 | 0.264  | 0.319  | 114 | 113 | 124 |
| AHFENRKKEEEEELVSLKDR   | 5 | 587.5330 | 587.5316 | 0.0069  | iTRAQ4plex@N-term;<br>iTRAQ4plex(K)@7;<br>iTRAQ4plex(K)@8;<br>iTRAQ4plex(K)@17 | 99   | 8352.32  | 1382.08 | 114.7  | 1600.09 | 126.71 | 1486.3  | 125.88 | 2982.83 | 168.02 | 0.498 | 1.075  | 1.864  | 118 | 117 | 136 |
| AHFENRKKEEEEELVSLKDRIE | 5 | 635.9596 | 635.9570 | 0.0132  | iTRAQ4plex@N-term;<br>iTRAQ4plex(K)@7;<br>iTRAQ4plex(K)@8;<br>iTRAQ4plex(K)@17 | 99   | 6855.42  | 3741.85 | 188.44 | 3784.56 | 193.85 | 1415.86 | 127.73 | 2608.96 | 157.39 | 0.543 | 0.378  | 0.689  | 118 | 117 | 138 |
| AHFENRKKEEEE           | 4 | 495.2642 | 495.2643 | -0.0005 | iTRAQ4plex@N-term;<br>iTRAQ4plex(K)@7;<br>iTRAQ4plex(K)@8                      | 99   | 1928.45  | 177.01  | 40.98  | 177.14  | 51.47  | 2990.64 | 168.11 | 1334.6  | 116.91 | 2.241 | 16.895 | 7.534  | 118 | 117 | 129 |
| FENRKKEEEEELVSLKDRIE   | 5 | 594.3400 | 594.3378 | 0.0113  | iTRAQ4plex@N-term;<br>iTRAQ4plex(K)@5;<br>iTRAQ4plex(K)@6;<br>iTRAQ4plex(K)@15 | 99   | 8848.17  | 1879.12 | 133.4  | 1711.91 | 132.15 | 1775.51 | 136.03 | 2770.6  | 162.48 | 0.641 | 0.945  | 1.618  | 120 | 119 | 138 |
| FENRKKEEEEELVSLKDR     | 5 | 545.9138 | 545.9124 | 0.0070  | iTRAQ4plex@N-term;<br>iTRAQ4plex(K)@5;<br>iTRAQ4plex(K)@6;<br>iTRAQ4plex(K)@15 | 99   | 16611.93 | 1987.89 | 137.42 | 2112.73 | 151.11 | 6880.48 | 262.45 | 10253.4 | 312.61 | 0.671 | 3.461  | 4.853  | 120 | 119 | 136 |
| FENRKKEEEEELV          | 3 | 661.3749 | 661.3688 | 0.0182  | iTRAQ4plex@N-term;<br>iTRAQ4plex(K)@5;<br>iTRAQ4plex(K)@6                      | 99   | 2178.59  | 308.23  | 54.03  | 281.09  | 55.22  | 898.72  | 92.88  | 405.54  | 64.41  | 2.216 | 2.916  | 1.443  | 120 | 119 | 131 |
| ENRKKEEEEELVSLKDRIE    | 5 | 564.9261 | 564.9241 | 0.0101  | iTRAQ4plex@N-term;<br>iTRAQ4plex(K)@4;<br>iTRAQ4plex(K)@5;<br>iTRAQ4plex(K)@14 | 99   | 63805.47 | 10740.5 | 318.83 | 9496.02 | 308.89 | 4673.73 | 225.42 | 5280.88 | 225.7  | 0.885 | 0.435  | 0.556  | 121 | 120 | 138 |
| ENRKKEEEEELVSLKDR      | 5 | 516.4998 | 516.4987 | 0.0054  | iTRAQ4plex@N-term;<br>iTRAQ4plex(K)@4;<br>iTRAQ4plex(K)@5;<br>iTRAQ4plex(K)@14 | 99   | 88425.84 | 3655.1  | 185.98 | 3211.83 | 182.78 | 5212.03 | 228.48 | 5473.76 | 230.05 | 0.952 | 1.426  | 1.704  | 121 | 120 | 136 |
| NRKEEEEELVSLKDR        | 5 | 490.6910 | 490.6902 | 0.0039  | iTRAQ4plex@N-term;<br>iTRAQ4plex(K)@3;<br>iTRAQ4plex(K)@4;<br>iTRAQ4plex(K)@13 | 99   | 16431.43 | 3118.9  | 171.85 | 2821.26 | 173.24 | 6908.89 | 261.04 | 6699.31 | 254.88 | 1.031 | 2.215  | 2.375  | 122 | 121 | 136 |
| NRKEEEEELVSLKDRIE      | 5 | 539.1176 | 539.1155 | 0.0103  | iTRAQ4plex@N-term;<br>iTRAQ4plex(K)@3;<br>iTRAQ4plex(K)@4;<br>iTRAQ4plex(K)@13 | 99   | 10888.5  | 3316.57 | 177.12 | 2846.64 | 170.24 | 2453.11 | 158.85 | 2282.94 | 149.08 | 1.075 | 0.740  | 0.802  | 122 | 121 | 138 |
| RKEEEEELVSLKD          | 4 | 545.5770 | 545.5750 | 0.0083  | iTRAQ4plex@N-term;<br>iTRAQ4plex(K)@2;<br>iTRAQ4plex(K)@3;<br>iTRAQ4plex(K)@12 | 97.5 | 1490.62  | 103.98  | 31.46  | 120.25  | 37.14  | 673.73  | 80.98  | 663.34  | 80.18  | 1.016 | 6.479  | 5.516  | 123 | 122 | 135 |

Table S1

|                             |   |          |          |         |                                                                                                       |      |          |         |        |         |        |         |        |         |        |       |        |        |     |     |     |
|-----------------------------|---|----------|----------|---------|-------------------------------------------------------------------------------------------------------|------|----------|---------|--------|---------|--------|---------|--------|---------|--------|-------|--------|--------|-----|-----|-----|
| RKKEEELVSLKDRIE             | 5 | 516.3077 | 516.3069 | 0.0035  | iTRAQ4plex@N-term;<br>iTRAQ4plex(K)@2;<br>iTRAQ4plex(K)@3;<br>iTRAQ4plex(K)@12                        | 99   | 83561.24 | 3171.7  | 173.55 | 3323.81 | 211.27 | 39231.9 | 614.44 | 33038.9 | 568.91 | 1.187 | 12.369 | 9.940  | 123 | 122 | 138 |
| RKKEEELVSLKDR               | 5 | 467.8816 | 467.8817 | -0.0002 | iTRAQ4plex@N-term;<br>iTRAQ4plex(K)@2;<br>iTRAQ4plex(K)@3;<br>iTRAQ4plex(K)@12                        | 99   | 122107.5 | 924.2   | 93.21  | 521.53  | 125.48 | 33703.1 | 568.19 | 28008   | 523.13 | 1.203 | 36.467 | 53.703 | 123 | 122 | 136 |
| KEEELVSLKDRIE               | 4 | 538.0616 | 538.0574 | 0.0169  | iTRAQ4plex@N-term;<br>iTRAQ4plex(K)@1;<br>iTRAQ4plex(K)@10                                            | 99   | 117064.1 | 52638.9 | 707.1  | 55519.1 | 738.42 | 6181.1  | 303.24 | 6809.23 | 257.33 | 0.908 | 0.117  | 0.123  | 125 | 124 | 138 |
| KEEELVSLKDR                 | 3 | 636.3703 | 636.3652 | 0.0154  | iTRAQ4plex@N-term;<br>iTRAQ4plex(K)@1;<br>iTRAQ4plex(K)@10                                            | 99   | 37864.92 | 12769.2 | 347.89 | 12172.9 | 348.55 | 5253.99 | 240.34 | 5403.44 | 228.88 | 0.972 | 0.411  | 0.444  | 125 | 124 | 136 |
| KEEELVSLKDRIER              | 4 | 577.0847 | 577.0826 | 0.0083  | iTRAQ4plex@N-term;<br>iTRAQ4plex(K)@1;<br>iTRAQ4plex(K)@10                                            | 99   | 661.22   | 304.61  | 53.84  | 350.17  | 58.64  | 91.09   | 32.86  | 90.47   | 29.66  | 1.007 | 0.299  | 0.258  | 125 | 124 | 139 |
| KEEELVSLKD                  | 3 | 584.3331 | 584.3315 | 0.0050  | iTRAQ4plex@N-term;<br>iTRAQ4plex(K)@1;<br>iTRAQ4plex(K)@10                                            | 98.5 | 4657.49  | 3213.66 | 174.76 | 3471.07 | 184.74 | 666.34  | 91.69  | 612.55  | 77.38  | 1.088 | 0.207  | 0.176  | 125 | 124 | 135 |
| EEELVSLKDRIE                | 3 | 626.3433 | 626.3417 | 0.0048  | iTRAQ4plex@N-term;<br>iTRAQ4plex(K)@9                                                                 | 99   | 6283.56  | 856.91  | 90.1   | 796.84  | 91.37  | 1574.69 | 125.28 | 1716.67 | 128.72 | 0.917 | 1.838  | 2.154  | 126 | 125 | 138 |
| EEELVSLKDR                  | 3 | 545.6334 | 545.6328 | 0.0018  | iTRAQ4plex@N-term;<br>iTRAQ4plex(K)@9                                                                 | 99   | 13742.55 | 1480.09 | 118.43 | 1397.14 | 127.69 | 8187.63 | 282.55 | 8486.31 | 286.4  | 0.965 | 5.532  | 6.074  | 126 | 125 | 136 |
| EELVSLKDRIE                 | 3 | 540.3158 | 540.3133 | 0.0074  | iTRAQ4plex@N-term;<br>iTRAQ4plex(K)@7                                                                 | 99   | 53994.85 | 12597.3 | 345.6  | 12179.8 | 355.55 | 21454.6 | 460.13 | 16171.3 | 399.49 | 1.327 | 1.703  | 1.328  | 128 | 127 | 138 |
| LVSLKDRIERRRAERAE           | 4 | 597.1085 | 597.1064 | 0.0082  | iTRAQ4plex@N-term;<br>iTRAQ4plex(K)@5                                                                 | 99   | 8144.67  | 233.79  | 47.22  | 290.54  | 56.65  | 1218.47 | 111.43 | 2485.63 | 153.35 | 0.490 | 5.212  | 8.555  | 130 | 129 | 146 |
| SLKDRIERRRAERAE             | 3 | 725.0921 | 725.0887 | 0.0102  | iTRAQ4plex@N-term;<br>iTRAQ4plex(K)@3                                                                 | 99   | 2615.9   | 97.34   | 30.49  | 128.74  | 35.49  | 45.32   | 22.8   | 68.06   | 25.49  | 0.666 | 0.466  | 0.529  | 132 | 131 | 146 |
| QQRIRNEREKERQNLAEER         | 5 | 586.1294 | 586.1265 | 0.0145  | iTRAQ4plex@N-term;<br>iTRAQ4plex(K)@10                                                                | 99   | 12731.77 | 2006.26 | 138.07 | 2156.55 | 146.27 | 996.57  | 104.63 | 1234.93 | 108.93 | 0.807 | 0.497  | 0.573  | 147 | 146 | 166 |
| QQRIRNEREKERQNLRA           | 4 | 628.8620 | 628.8597 | 0.0091  | iTRAQ4plex@N-term;<br>iTRAQ4plex(K)@10                                                                | 99   | 30608    | 4051.84 | 196.03 | 3992.15 | 200.59 | 3290.37 | 183.58 | 2476.49 | 156.17 | 1.329 | 0.812  | 0.620  | 147 | 146 | 163 |
| QQRIRNEREKERQNLAAE          | 5 | 554.9083 | 554.9063 | 0.0102  | iTRAQ4plex@N-term;<br>iTRAQ4plex(K)@10                                                                | 99   | 14550.89 | 987.24  | 96.73  | 943.2   | 97.97  | 1014.62 | 101.08 | 742.45  | 85.54  | 1.367 | 1.028  | 0.787  | 147 | 146 | 165 |
| RIRNEREKERQNLRA             | 4 | 564.8325 | 564.8304 | 0.0083  | iTRAQ4plex@N-term;<br>iTRAQ4plex(K)@8                                                                 | 97.8 | 7680.35  | 767.48  | 85.25  | 699.07  | 84.55  | 800.26  | 89.37  | 472.22  | 68.77  | 1.695 | 1.043  | 0.675  | 149 | 148 | 163 |
| NEREKERQNLAAE               | 4 | 523.0300 | 523.0302 | -0.0006 | iTRAQ4plex@N-term;<br>iTRAQ4plex(K)@5                                                                 | 98.7 | 4335.77  | 1481.9  | 118.47 | 1364.73 | 118.3  | 1736.75 | 131.02 | 821.49  | 91.53  | 2.114 | 1.172  | 0.602  | 152 | 151 | 165 |
| RLAEERARREE                 | 3 | 520.2885 | 520.2892 | -0.0020 | iTRAQ4plex@N-term                                                                                     | 97.4 | 396.59   | 50.2    | 21.91  | 68.5    | 26.45  | 125.42  | 34.92  | 54.4    | 23.66  | 2.306 | 2.498  | 0.794  | 161 | 160 | 171 |
| EERARREEENRRKAEDAARKKKALSNM | 7 | 597.9077 | 597.9024 | 0.0371  | iTRAQ4plex@N-term;<br>iTRAQ4plex(K)@14;<br>iTRAQ4plex(K)@21;<br>iTRAQ4plex(K)@22;<br>iTRAQ4plex(K)@23 | 99   | 17684.76 | 6076.24 | 240.03 | 5906.64 | 244.55 | 5611.98 | 237.89 | 3315.7  | 182.2  | 1.693 | 0.924  | 0.561  | 164 | 163 | 191 |
| EERARREEENRRKAEDAARKKKALS   | 6 | 656.5453 | 656.5377 | 0.0455  | iTRAQ4plex@N-term;<br>iTRAQ4plex(K)@14;<br>iTRAQ4plex(K)@21;<br>iTRAQ4plex(K)@22;<br>iTRAQ4plex(K)@23 | 99   | 5344.19  | 2063.67 | 139.73 | 1793.64 | 135.44 | 1888.18 | 137.53 | 1068.67 | 103.57 | 1.767 | 0.915  | 0.596  | 164 | 163 | 189 |
| ARREEENRRKAEDE              | 4 | 552.0360 | 552.0357 | 0.0012  | iTRAQ4plex@N-term;<br>iTRAQ4plex(K)@11                                                                | 99   | 1026.69  | 235.84  | 47.22  | 194.56  | 44.27  | 81.81   | 29.83  | 51.02   | 22.58  | 1.603 | 0.347  | 0.262  | 167 | 166 | 181 |
| ARREEENRRKAEDAARKKKALSNM    | 6 | 628.3595 | 628.3539 | 0.0337  | iTRAQ4plex@N-term;<br>iTRAQ4plex(K)@11;<br>iTRAQ4plex(K)@18;<br>iTRAQ4plex(K)@19;<br>iTRAQ4plex(K)@20 | 99   | 31901.04 | 5235.48 | 222.54 | 4509.07 | 213.53 | 2954.13 | 174.82 | 1610.99 | 127.54 | 1.834 | 0.564  | 0.357  | 167 | 166 | 191 |
| ARREEENRRKAE                | 4 | 491.0177 | 491.0183 | -0.0025 | iTRAQ4plex@N-term;<br>iTRAQ4plex(K)@11                                                                | 98.1 | 1415.64  | 740.61  | 83.71  | 648.23  | 80.55  | 228.89  | 50.39  | 118.18  | 34.64  | 1.937 | 0.309  | 0.182  | 167 | 166 | 179 |
| EENRRKAEDAARKKKALSNM        | 5 | 625.5623 | 625.5583 | 0.0201  | iTRAQ4plex@N-term;<br>iTRAQ4plex(K)@6;<br>iTRAQ4plex(K)@13;<br>iTRAQ4plex(K)@14;<br>iTRAQ4plex(K)@15  | 99   | 43464.21 | 6023.98 | 238.65 | 5022.47 | 225.91 | 3696.48 | 195.6  | 2954.07 | 170.25 | 1.251 | 0.614  | 0.588  | 172 | 171 | 191 |

Table S1

|                   |   |          |          |         |                                                                                                      |      |          |         |        |         |        |         |        |         |        |       |       |       |     |     |     |
|-------------------|---|----------|----------|---------|------------------------------------------------------------------------------------------------------|------|----------|---------|--------|---------|--------|---------|--------|---------|--------|-------|-------|-------|-----|-----|-----|
| EENRRKADEARKKALS  | 5 | 576.5446 | 576.5416 | 0.0150  | iTRAQ4plex@N-term;<br>iTRAQ4plex(K)@6;<br>iTRAQ4plex(K)@13;<br>iTRAQ4plex(K)@14;<br>iTRAQ4plex(K)@15 | 98.7 | 5250.57  | 3131.44 | 171.76 | 2089.57 | 146.95 | 1526.36 | 125.08 | 784.31  | 89.15  | 1.946 | 0.487 | 0.375 | 172 | 171 | 189 |
| NMMHFGGYIQKQAQ    | 3 | 647.6649 | 647.6620 | 0.0089  | iTRAQ4plex@N-term;<br>iTRAQ4plex(K)@11                                                               | 99   | 1342.3   | 317.5   | 55.04  | 402.38  | 62.76  | 120.13  | 38.07  | 270.87  | 50.59  | 0.443 | 0.378 | 0.673 | 190 | 189 | 203 |
| NMMHFGGYIQKQA     | 3 | 604.9783 | 604.9758 | 0.0075  | iTRAQ4plex@N-term;<br>iTRAQ4plex(K)@11                                                               | 99   | 606.89   | 125.88  | 34.78  | 202.12  | 44.6   | 156.19  | 41.1   | 327.8   | 55.67  | 0.476 | 1.241 | 1.622 | 190 | 189 | 202 |
| NMMHFGGYIQK       | 3 | 538.6112 | 538.6105 | 0.0020  | iTRAQ4plex@N-term;<br>iTRAQ4plex(K)@11                                                               | 99   | 2636.02  | 677.42  | 80.3   | 783.07  | 88.42  | 614.81  | 80.36  | 817.65  | 88.47  | 0.752 | 0.908 | 1.044 | 190 | 189 | 200 |
| NMMHFGGYIQ        | 2 | 671.3157 | 671.3137 | 0.0040  | iTRAQ4plex@N-term                                                                                    | 99   | 1220.73  | 191.21  | 42.42  | 118.76  | 35.35  | 131.45  | 36.74  | 162.54  | 39.49  | 0.809 | 0.687 | 1.369 | 190 | 189 | 199 |
| NMMHFGGYIQKQAQTER | 4 | 582.5488 | 582.5461 | 0.0108  | iTRAQ4plex@N-term;<br>iTRAQ4plex(K)@11                                                               | 97.5 | 646.29   | 276.21  | 51.18  | 270.2   | 51.95  | 138.16  | 38.72  | 166.39  | 39.99  | 0.830 | 0.500 | 0.616 | 190 | 189 | 206 |
| MMHFGGYIQK        | 3 | 500.5972 | 500.5962 | 0.0029  | iTRAQ4plex@N-term;<br>iTRAQ4plex(K)@10                                                               | 99   | 485.05   | 199.99  | 43.58  | 209.25  | 45.82  | 161.34  | 41.23  | 220.19  | 45.93  | 0.733 | 0.807 | 1.052 | 191 | 190 | 200 |
| MHFGGYIQKQAQTERK  | 5 | 471.6621 | 471.6611 | 0.0051  | iTRAQ4plex@N-term;<br>iTRAQ4plex(K)@9;<br>iTRAQ4plex(K)@16                                           | 99   | 40508.85 | 18502.2 | 421.23 | 28028.4 | 519.17 | 0       | 254.9  | 6785.51 | 250.68 | 0.000 | 0.000 | 0.242 | 192 | 191 | 207 |
| MHFGGYIQKQAQTER   | 4 | 521.2767 | 521.2753 | 0.0056  | iTRAQ4plex@N-term;<br>iTRAQ4plex(K)@9                                                                | 99   | 27889.9  | 13374.1 | 357.44 | 17759.1 | 414.48 | 65.95   | 106.57 | 1345.03 | 112.32 | 0.049 | 0.005 | 0.076 | 192 | 191 | 206 |
| MHFGGYIQKQAQTE    | 3 | 642.6674 | 642.6642 | 0.0095  | iTRAQ4plex@N-term;<br>iTRAQ4plex(K)@9                                                                | 99   | 1883.29  | 632.32  | 77.51  | 678.65  | 82.02  | 286.49  | 57.61  | 700.32  | 81.23  | 0.409 | 0.453 | 1.032 | 192 | 191 | 205 |
| MHFGGYIQKQAQ      | 3 | 565.9691 | 565.9675 | 0.0049  | iTRAQ4plex@N-term;<br>iTRAQ4plex(K)@9                                                                | 99   | 100943.2 | 28427.8 | 519.21 | 27640.2 | 528.18 | 22325.7 | 491.02 | 47093.6 | 668.45 | 0.474 | 0.785 | 1.704 | 192 | 191 | 203 |
| MHFGGYIQKQAQT     | 3 | 599.6514 | 599.6500 | 0.0041  | iTRAQ4plex@N-term;<br>iTRAQ4plex(K)@9                                                                | 99   | 1890.4   | 953.64  | 95.22  | 1054.11 | 101.97 | 339.38  | 63.16  | 611.83  | 76.21  | 0.555 | 0.356 | 0.580 | 192 | 191 | 204 |
| MHFGGYIQK         | 3 | 456.9139 | 456.9161 | -0.0065 | iTRAQ4plex@N-term;<br>iTRAQ4plex(K)@9                                                                | 99   | 101815.9 | 45601.8 | 657.85 | 46041.5 | 678.79 | 28985.5 | 554.53 | 32679.3 | 562.58 | 0.887 | 0.636 | 0.710 | 192 | 191 | 200 |
| MHFGGYIQKQ        | 3 | 499.6017 | 499.6023 | -0.0016 | iTRAQ4plex@N-term;<br>iTRAQ4plex(K)@9                                                                | 99   | 8810.56  | 4478.72 | 205.93 | 4064.99 | 202.18 | 2341.36 | 158.12 | 2525.75 | 156.36 | 0.927 | 0.523 | 0.621 | 192 | 191 | 201 |
| HFGGYIQKQAQTERK   | 5 | 445.4520 | 445.4530 | -0.0050 | iTRAQ4plex@N-term;<br>iTRAQ4plex(K)@8;<br>iTRAQ4plex(K)@15                                           | 99   | 7176.65  | 1246.62 | 109.25 | 1793.21 | 132.31 | 639.52  | 90.49  | 3130.33 | 170.98 | 0.204 | 0.513 | 1.746 | 193 | 192 | 207 |
| HFGGYIQKQAQTER    | 4 | 488.5160 | 488.5152 | 0.0033  | iTRAQ4plex@N-term;<br>iTRAQ4plex(K)@8                                                                | 99   | 2810.78  | 527.78  | 71.12  | 783.53  | 87.22  | 204.77  | 50.49  | 521.7   | 70.14  | 0.393 | 0.388 | 0.666 | 193 | 192 | 206 |
| HFGGYIQKQAQ       | 3 | 522.2875 | 522.2874 | 0.0005  | iTRAQ4plex@N-term;<br>iTRAQ4plex(K)@8                                                                | 99   | 21667.15 | 372.02  | 59.41  | 370.04  | 61.39  | 441.18  | 66.32  | 272.37  | 52.15  | 1.620 | 1.186 | 0.736 | 193 | 192 | 203 |
| FGGYIQKQAQTERK    | 4 | 522.3005 | 522.2997 | 0.0032  | iTRAQ4plex@N-term;<br>iTRAQ4plex(K)@7;<br>iTRAQ4plex(K)@14                                           | 99   | 3981.79  | 1726.7  | 127.89 | 1591.03 | 126.12 | 611.23  | 86.47  | 2267.09 | 145.65 | 0.270 | 0.354 | 1.425 | 194 | 193 | 207 |
| FGGYIQKQAQTER     | 3 | 605.3334 | 605.3315 | 0.0057  | iTRAQ4plex@N-term;<br>iTRAQ4plex(K)@7                                                                | 99   | 1499.53  | 880.15  | 91.53  | 1017.48 | 99.79  | 148.97  | 46.36  | 465.2   | 66.1   | 0.320 | 0.169 | 0.457 | 194 | 193 | 206 |
| FGGYIQKQAQ        | 2 | 714.3997 | 714.3979 | 0.0037  | iTRAQ4plex@N-term;<br>iTRAQ4plex(K)@7                                                                | 99   | 699.33   | 185.24  | 41.83  | 145.63  | 39.49  | 339.75  | 58.39  | 463.92  | 66.63  | 0.732 | 1.834 | 3.186 | 194 | 193 | 203 |
| GGYIQKQAQTERK     | 4 | 485.5324 | 485.5326 | -0.0007 | iTRAQ4plex@N-term;<br>iTRAQ4plex(K)@6;<br>iTRAQ4plex(K)@13                                           | 99   | 11648.24 | 7754.45 | 271.16 | 7556.03 | 274.39 | 3081.21 | 188.63 | 6833.52 | 254.05 | 0.451 | 0.397 | 0.904 | 195 | 194 | 207 |
| GGYIQKQAQTER      | 3 | 556.3112 | 556.3087 | 0.0076  | iTRAQ4plex@N-term;<br>iTRAQ4plex(K)@6                                                                | 99   | 4315.25  | 2700.7  | 159.91 | 2446.15 | 156.15 | 688.75  | 90.93  | 1205.26 | 107.04 | 0.571 | 0.255 | 0.493 | 195 | 194 | 206 |
| GGYIQKQAQTE       | 3 | 504.2747 | 504.2750 | -0.0009 | iTRAQ4plex@N-term;<br>iTRAQ4plex(K)@6                                                                | 99   | 468.66   | 317.22  | 54.86  | 314.27  | 56.29  | 260.15  | 52.43  | 409.57  | 62.44  | 0.635 | 0.820 | 1.303 | 195 | 194 | 205 |
| GGYIQKQAQ         | 3 | 427.5771 | 427.5782 | -0.0034 | iTRAQ4plex@N-term;<br>iTRAQ4plex(K)@6                                                                | 99   | 13130.57 | 3309.68 | 177.01 | 2952.92 | 177.54 | 7523.57 | 271.68 | 6482.17 | 251.55 | 1.161 | 2.273 | 2.195 | 195 | 194 | 203 |
| GYIQKQAQTER       | 3 | 537.3016 | 537.3015 | 0.0002  | iTRAQ4plex@N-term;<br>iTRAQ4plex(K)@5                                                                | 99   | 1365.94  | 503.42  | 69.2   | 566.34  | 75.16  | 388.41  | 65.41  | 909.73  | 92.62  | 0.427 | 0.772 | 1.606 | 196 | 195 | 206 |
| GYIQKQAQTERK      | 4 | 471.2771 | 471.2772 | -0.0005 | iTRAQ4plex@N-term;<br>iTRAQ4plex(K)@5;<br>iTRAQ4plex(K)@12                                           | 98.6 | 5386.18  | 4506.47 | 206.8  | 4572.06 | 213.44 | 2244.2  | 157.77 | 3782.8  | 189.63 | 0.593 | 0.498 | 0.827 | 196 | 195 | 207 |
| KQAQTERKSGKRQTE   | 5 | 471.0765 | 471.0779 | -0.0067 | iTRAQ4plex@N-term;<br>iTRAQ4plex(K)@1;<br>iTRAQ4plex(K)@8;<br>iTRAQ4plex(K)@11                       | 99   | 29325.24 | 18581.1 | 419.75 | 18094.8 | 435.31 | 37526.5 | 608.02 | 31382   | 554.23 | 1.196 | 2.020 | 1.734 | 200 | 199 | 214 |
| KQAQTERKSGKRQ     | 5 | 425.0575 | 425.0598 | -0.0114 | iTRAQ4plex@N-term;<br>iTRAQ4plex(K)@1;<br>iTRAQ4plex(K)@8;<br>iTRAQ4plex(K)@11                       | 99   | 6274.41  | 6321.52 | 244.85 | 6217.06 | 248.24 | 1711.12 | 141.26 | 1353.81 | 115.51 | 1.264 | 0.271 | 0.218 | 200 | 199 | 212 |

Table S1

|                           |   |          |          |         |                                                                                                     |      |          |         |        |         |        |         |        |         |        |       |       |       |     |     |     |
|---------------------------|---|----------|----------|---------|-----------------------------------------------------------------------------------------------------|------|----------|---------|--------|---------|--------|---------|--------|---------|--------|-------|-------|-------|-----|-----|-----|
| QAQTERKSGKRQTE            | 4 | 520.5459 | 520.5462 | -0.0013 | iTRAQ4plex@N-term;<br>iTRAQ4plex(K)@7;<br>iTRAQ4plex(K)@10                                          | 98.2 | 8637.16  | 3756.78 | 188.86 | 3894.51 | 198.42 | 3947    | 200.1  | 3309.58 | 179.9  | 1.193 | 1.051 | 0.850 | 201 | 200 | 214 |
| AQTERKSGKRQTE             | 4 | 488.5305 | 488.5316 | -0.0044 | iTRAQ4plex@N-term;<br>iTRAQ4plex(K)@6;<br>iTRAQ4plex(K)@9                                           | 99   | 3453.41  | 1600.08 | 123.19 | 1576.97 | 125    | 422.47  | 70.49  | 378.25  | 60.82  | 1.117 | 0.264 | 0.240 | 202 | 201 | 214 |
| REKKKKILAEER              | 4 | 530.6071 | 530.6056 | 0.0060  | iTRAQ4plex@N-term;<br>iTRAQ4plex(K)@3;<br>iTRAQ4plex(K)@4;<br>iTRAQ4plex(K)@5;<br>iTRAQ4plex(K)@6   | 99   | 21392.55 | 3554.44 | 183.36 | 3042.6  | 174.62 | 1030.29 | 108.24 | 1063.14 | 101.53 | 0.969 | 0.290 | 0.349 | 215 | 214 | 225 |
| AERRKVLAIIDLHNLNEDQLRE    | 5 | 519.4965 | 519.4941 | 0.0123  | iTRAQ4plex@N-term;<br>iTRAQ4plex(K)@5                                                               | 99   | 2478.49  | 265.04  | 50.09  | 237.36  | 48.98  | 163.75  | 42.42  | 371.91  | 59.24  | 0.440 | 0.618 | 1.567 | 223 | 222 | 241 |
| AERRKVLAIIDLHNLNED        | 4 | 517.5455 | 517.5442 | 0.0052  | iTRAQ4plex@N-term;<br>iTRAQ4plex(K)@5                                                               | 99   | 1805     | 280.98  | 51.66  | 298.39  | 54.49  | 158.11  | 41.71  | 265.93  | 50.29  | 0.595 | 0.563 | 0.891 | 223 | 222 | 237 |
| AERRKVLAIIDLHNLNEDQLR     | 5 | 493.6863 | 493.6855 | 0.0038  | iTRAQ4plex@N-term;<br>iTRAQ4plex(K)@5                                                               | 99   | 2731.58  | 390.69  | 61.06  | 500.22  | 70.7   | 484.99  | 71.05  | 701.85  | 81.84  | 0.691 | 1.241 | 1.403 | 223 | 222 | 240 |
| ERRKVLAIIDLHNLNEDQLR      | 5 | 479.4785 | 479.4781 | 0.0018  | iTRAQ4plex@N-term;<br>iTRAQ4plex(K)@4                                                               | 99   | 3702.06  | 691.66  | 80.98  | 673.12  | 82.81  | 757.87  | 88.64  | 1166.19 | 105.39 | 0.650 | 1.096 | 1.733 | 224 | 223 | 240 |
| RKVLAIIDLHNLNEDQLREKAKELW | 6 | 547.6580 | 547.6556 | 0.0142  | iTRAQ4plex@N-term;<br>iTRAQ4plex(K)@2;<br>iTRAQ4plex(K)@17;<br>iTRAQ4plex(K)@19                     | 98.5 | 3169.36  | 1278.28 | 110.53 | 1722.45 | 129.25 | 175.16  | 53     | 503.69  | 68.92  | 0.348 | 0.137 | 0.292 | 226 | 225 | 247 |
| RKVLAIIDLHNLNED           | 4 | 428.4990 | 428.4990 | 0.0001  | iTRAQ4plex@N-term;<br>iTRAQ4plex(K)@2                                                               | 98   | 2406.5   | 651     | 78.41  | 511.78  | 71.68  | 103.36  | 36.05  | 113.42  | 33.16  | 0.911 | 0.159 | 0.222 | 226 | 225 | 237 |
| RKVLAIIDLHNLNEDQLRE       | 4 | 560.0710 | 560.0706 | 0.0017  | iTRAQ4plex@N-term;<br>iTRAQ4plex(K)@2                                                               | 99   | 3048.33  | 736.61  | 83.59  | 733.94  | 86.01  | 616.49  | 79.8   | 619.86  | 77.52  | 0.995 | 0.837 | 0.845 | 226 | 225 | 241 |
| RKVLAIIDLHNLNEDQLR        | 5 | 422.4496 | 422.4494 | 0.0010  | iTRAQ4plex@N-term;<br>iTRAQ4plex(K)@2                                                               | 99   | 9628.12  | 789.27  | 86.36  | 638.81  | 80.36  | 318.19  | 58.47  | 266.17  | 51.09  | 1.195 | 0.403 | 0.417 | 226 | 225 | 240 |
| KVLAIIDLHNLNEDQLR         | 4 | 488.7858 | 488.7846 | 0.0046  | iTRAQ4plex@N-term;<br>iTRAQ4plex(K)@1                                                               | 99   | 1772.86  | 588.97  | 74.55  | 442.71  | 68.03  | 634.13  | 79.74  | 602.34  | 76.47  | 1.053 | 1.077 | 1.361 | 227 | 226 | 240 |
| AIDLHNLNEDQLREKAKELW      | 5 | 528.8951 | 528.8952 | -0.0006 | iTRAQ4plex@N-term;<br>iTRAQ4plex(K)@13;<br>iTRAQ4plex(K)@15                                         | 99   | 1819.72  | 486.62  | 68.11  | 596.74  | 76.87  | 366.52  | 62.68  | 498.87  | 69.13  | 0.735 | 0.753 | 0.836 | 230 | 229 | 247 |
| AIDLHNLNEDQLRE            | 3 | 532.9423 | 532.9415 | 0.0026  | iTRAQ4plex@N-term                                                                                   | 99   | 2596.32  | 335.87  | 56.74  | 499.3   | 70.27  | 430.52  | 66.55  | 414.48  | 63.48  | 1.039 | 1.282 | 0.830 | 230 | 229 | 241 |
| AIDLHNLNEDQLR             | 3 | 489.9268 | 489.9272 | -0.0014 | iTRAQ4plex@N-term                                                                                   | 99   | 5857.02  | 1134.62 | 103.67 | 1047.49 | 104.48 | 1897.55 | 136.58 | 1293.72 | 113.17 | 1.467 | 1.672 | 1.235 | 230 | 229 | 240 |
| IDHLNEDQLREKAKELW         | 4 | 643.1116 | 643.1079 | 0.0146  | iTRAQ4plex@N-term;<br>iTRAQ4plex(K)@12;<br>iTRAQ4plex(K)@14                                         | 99   | 122338.1 | 32743.1 | 558.08 | 36790.6 | 607.32 | 31483.9 | 579.7  | 59942   | 755.87 | 0.525 | 0.962 | 1.629 | 231 | 230 | 247 |
| IDHLNEDQLRE               | 3 | 509.2628 | 509.2624 | 0.0011  | iTRAQ4plex@N-term                                                                                   | 99   | 117630.5 | 3307.6  | 176.81 | 2713.16 | 170.59 | 6883.5  | 259.25 | 5103.38 | 224.18 | 1.349 | 2.081 | 1.881 | 231 | 230 | 241 |
| IDHLNEDQLREKA             | 4 | 468.0063 | 468.0072 | -0.0035 | iTRAQ4plex@N-term;<br>iTRAQ4plex(K)@12                                                              | 98.1 | 25598.88 | 631.1   | 77.45  | 686.02  | 84.13  | 1222.15 | 109.76 | 901.86  | 94.29  | 1.355 | 1.937 | 1.315 | 231 | 230 | 243 |
| IDHLNEDQLREKAKE           | 4 | 568.3185 | 568.3171 | 0.0056  | iTRAQ4plex@N-term;<br>iTRAQ4plex(K)@12;<br>iTRAQ4plex(K)@14                                         | 98.7 | 659.89   | 352.55  | 57.7   | 274.44  | 53.75  | 484.83  | 69.13  | 348.65  | 58.64  | 1.391 | 1.375 | 1.270 | 231 | 230 | 245 |
| IDHLNEDQLR                | 2 | 698.8740 | 698.8687 | 0.0107  | iTRAQ4plex@N-term                                                                                   | 99   | 16758.9  | 1392.16 | 114.96 | 1426.46 | 125.96 | 6156.51 | 243.13 | 3544.15 | 188.51 | 1.737 | 4.422 | 2.485 | 231 | 230 | 240 |
| IDHLNEDQLREKAK            | 5 | 429.0444 | 429.0466 | -0.0110 | iTRAQ4plex@N-term;<br>iTRAQ4plex(K)@12;<br>iTRAQ4plex(K)@14                                         | 99   | 9920.18  | 2183.01 | 143.71 | 1900.24 | 144.89 | 7108.04 | 261.5  | 4036.24 | 201.31 | 1.761 | 3.256 | 2.124 | 231 | 230 | 244 |
| HLNEDQLREKAKELW           | 4 | 586.0827 | 586.0801 | 0.0102  | iTRAQ4plex@N-term;<br>iTRAQ4plex(K)@10;<br>iTRAQ4plex(K)@12                                         | 98.4 | 23053.79 | 6665.51 | 252.13 | 8325.26 | 286.21 | 3748.38 | 202.6  | 4074.81 | 198.51 | 0.920 | 0.562 | 0.489 | 233 | 232 | 247 |
| HLNEDQLR                  | 2 | 584.8118 | 584.8132 | -0.0027 | iTRAQ4plex@N-term                                                                                   | 99   | 593.62   | 283.92  | 52.05  | 362.32  | 60.16  | 351.15  | 59.74  | 292.12  | 53.47  | 1.202 | 1.237 | 0.806 | 233 | 232 | 240 |
| LNEDQLREKAKELW            | 4 | 551.8160 | 551.8154 | 0.0022  | iTRAQ4plex@N-term;<br>iTRAQ4plex(K)@9;<br>iTRAQ4plex(K)@11                                          | 97.6 | 26519.26 | 9872.12 | 306.42 | 11037.9 | 331.36 | 6855.32 | 269.18 | 6896.06 | 258.55 | 0.994 | 0.694 | 0.625 | 234 | 233 | 247 |
| EDQLREKAKELW              | 3 | 659.7123 | 659.7092 | 0.0094  | iTRAQ4plex@N-term;<br>iTRAQ4plex(K)@7;<br>iTRAQ4plex(K)@9                                           | 99   | 22120.42 | 9493.87 | 300.51 | 10640.9 | 323.54 | 2884.91 | 184.12 | 2762.1  | 164.04 | 1.044 | 0.304 | 0.260 | 236 | 235 | 247 |
| QSIYNLEAEKFDLQE           | 3 | 705.7053 | 705.6998 | 0.0166  | iTRAQ4plex@N-term;<br>iTRAQ4plex(K)@10                                                              | 99   | 12885.1  | 4241.93 | 204.23 | 11553.8 | 330.3  | 0       | 112.31 | 939.23  | 93.53  | 0.000 | 0.000 | 0.081 | 248 | 247 | 262 |
| AEKFDLQEKFKQKQYEVNLR      | 6 | 563.3301 | 563.3295 | 0.0037  | iTRAQ4plex@N-term;<br>iTRAQ4plex(K)@3;<br>iTRAQ4plex(K)@9;<br>iTRAQ4plex(K)@11;<br>iTRAQ4plex(K)@14 | 98.7 | 3142.72  | 536.4   | 75.69  | 3732.9  | 186.57 | 132.55  | 60.74  | 910.32  | 92.18  | 0.146 | 0.247 | 0.244 | 255 | 254 | 275 |

Table S1

|                    |   |          |          |         |                                                                                                      |      |          |         |        |         |        |         |        |         |        |       |       |       |     |     |     |
|--------------------|---|----------|----------|---------|------------------------------------------------------------------------------------------------------|------|----------|---------|--------|---------|--------|---------|--------|---------|--------|-------|-------|-------|-----|-----|-----|
| AEKFDLQEKFKQKQKYE  | 5 | 556.7198 | 556.7178 | 0.0100  | iTRAQ4plex@N-term;<br>iTRAQ4plex(K)@3;<br>iTRAQ4plex(K)@9;<br>iTRAQ4plex(K)@11;<br>iTRAQ4plex(K)@14  | 99   | 15677.12 | 3397.89 | 180.45 | 5015.96 | 222.72 | 3975.62 | 211.2  | 12523.4 | 342.87 | 0.317 | 1.170 | 2.497 | 255 | 254 | 270 |
| AEKFDLQEKFKQKQKY   | 4 | 663.3879 | 663.3848 | 0.0125  | iTRAQ4plex@N-term;<br>iTRAQ4plex(K)@3;<br>iTRAQ4plex(K)@9;<br>iTRAQ4plex(K)@11;<br>iTRAQ4plex(K)@14  | 99   | 5566.45  | 923.58  | 94.48  | 1750.51 | 130.06 | 664.62  | 88.76  | 1850.89 | 131.94 | 0.359 | 0.720 | 1.057 | 255 | 254 | 269 |
| AEKFDLQEKFKQKQK    | 4 | 622.6217 | 622.6189 | 0.0111  | iTRAQ4plex@N-term;<br>iTRAQ4plex(K)@3;<br>iTRAQ4plex(K)@9;<br>iTRAQ4plex(K)@11;<br>iTRAQ4plex(K)@14  | 99   | 65836.44 | 16040.9 | 392.02 | 23474.3 | 485.11 | 28810.5 | 551.88 | 62465.8 | 768.22 | 0.461 | 1.796 | 2.661 | 255 | 254 | 268 |
| AEKFDLQEKFKQKQ     | 4 | 554.5710 | 554.5696 | 0.0053  | iTRAQ4plex@N-term;<br>iTRAQ4plex(K)@3;<br>iTRAQ4plex(K)@9;<br>iTRAQ4plex(K)@11                       | 99   | 3350.39  | 1316.29 | 111.83 | 1409.29 | 119.52 | 1586.9  | 129.05 | 2954.8  | 167.42 | 0.537 | 1.206 | 2.097 | 255 | 254 | 267 |
| AEKFDLQEKFK        | 4 | 490.5421 | 490.5404 | 0.0069  | iTRAQ4plex@N-term;<br>iTRAQ4plex(K)@3;<br>iTRAQ4plex(K)@9;<br>iTRAQ4plex(K)@11                       | 99   | 162509.5 | 27234   | 507.78 | 24587.4 | 495.58 | 8590.58 | 311.42 | 8302.84 | 284.84 | 1.035 | 0.315 | 0.338 | 255 | 254 | 265 |
| AEKFDLQEKFK        | 3 | 562.9880 | 562.9857 | 0.0067  | iTRAQ4plex@N-term;<br>iTRAQ4plex(K)@3;<br>iTRAQ4plex(K)@9                                            | 99   | 85388.65 | 1413.82 | 115.78 | 1378.77 | 122.95 | 5040.61 | 221.96 | 4762.4  | 215.18 | 1.058 | 3.565 | 3.454 | 255 | 254 | 264 |
| FDLQEKFKQKQK       | 4 | 504.5506 | 504.5497 | 0.0034  | iTRAQ4plex@N-term;<br>iTRAQ4plex(K)@6;<br>iTRAQ4plex(K)@8;<br>iTRAQ4plex(K)@11                       | 98.8 | 19653.49 | 6328.11 | 244.87 | 5961.49 | 256.05 | 22035.1 | 464.17 | 21131.8 | 453.13 | 1.043 | 3.482 | 3.545 | 258 | 257 | 268 |
| QEKFKQKQKYEINVL    | 5 | 506.3024 | 506.3027 | -0.0013 | iTRAQ4plex@N-term;<br>iTRAQ4plex(K)@3;<br>iTRAQ4plex(K)@5;<br>iTRAQ4plex(K)@8                        | 99   | 3217.42  | 666.44  | 79.68  | 790.34  | 90.93  | 1835.21 | 136.62 | 3142.12 | 172.72 | 0.584 | 2.754 | 3.976 | 261 | 260 | 275 |
| EKFQKQKYEINVL      | 5 | 480.6904 | 480.6909 | -0.0028 | iTRAQ4plex@N-term;<br>iTRAQ4plex(K)@2;<br>iTRAQ4plex(K)@4;<br>iTRAQ4plex(K)@7                        | 99   | 4419.8   | 1455.43 | 117.67 | 1646.33 | 129.83 | 2553.53 | 161.62 | 3961.02 | 194.22 | 0.645 | 1.754 | 2.406 | 262 | 261 | 275 |
| KFKQKQKYEINVL      | 4 | 568.3528 | 568.3512 | 0.0063  | iTRAQ4plex@N-term;<br>iTRAQ4plex(K)@1;<br>iTRAQ4plex(K)@3;<br>iTRAQ4plex(K)@6                        | 99   | 53105.56 | 17747.8 | 411.3  | 21697.8 | 463.21 | 12322.1 | 366.03 | 19149.3 | 427.42 | 0.643 | 0.694 | 0.883 | 263 | 262 | 275 |
| KFKQKQKYEINVL      | 3 | 705.4359 | 705.4322 | 0.0112  | iTRAQ4plex@N-term;<br>iTRAQ4plex(K)@1;<br>iTRAQ4plex(K)@3;<br>iTRAQ4plex(K)@6                        | 99   | 2285.43  | 510.56  | 69.63  | 532.18  | 73.13  | 434.19  | 67.67  | 649.76  | 78.73  | 0.668 | 0.850 | 1.221 | 263 | 262 | 274 |
| FKQKQKYEINVL       | 4 | 500.3023 | 500.3020 | 0.0014  | iTRAQ4plex@N-term;<br>iTRAQ4plex(K)@2;<br>iTRAQ4plex(K)@5                                            | 98.2 | 1290.51  | 660.79  | 79.11  | 602.53  | 77.83  | 351.9   | 61.06  | 319.74  | 55.86  | 1.101 | 0.533 | 0.531 | 264 | 263 | 275 |
| KQKQKYEINVL        | 4 | 463.5328 | 463.5349 | -0.0082 | iTRAQ4plex@N-term;<br>iTRAQ4plex(K)@1;<br>iTRAQ4plex(K)@4                                            | 99   | 13572.72 | 2059.46 | 140.09 | 2489.28 | 162.06 | 6644.8  | 257.35 | 8542.52 | 286.09 | 0.778 | 3.226 | 3.432 | 265 | 264 | 275 |
| QKQKYEINVL         | 3 | 526.9798 | 526.9784 | 0.0043  | iTRAQ4plex@N-term;<br>iTRAQ4plex(K)@3                                                                | 99   | 94941.23 | 5309.37 | 224.49 | 5417.13 | 231.33 | 1262.33 | 124.68 | 1867.01 | 133.81 | 0.676 | 0.238 | 0.345 | 266 | 265 | 275 |
| QKQKYEINVL         | 3 | 564.9953 | 564.9927 | 0.0078  | iTRAQ4plex@N-term;<br>iTRAQ4plex(K)@3                                                                | 99   | 4782.05  | 2989.16 | 168.41 | 2998.2  | 171.85 | 329.95  | 70.35  | 406.26  | 62.68  | 0.812 | 0.110 | 0.136 | 266 | 265 | 276 |
| YEINVLNRINDNQ      | 3 | 635.6777 | 635.6735 | 0.0126  | iTRAQ4plex@N-term                                                                                    | 99   | 39575.43 | 14281.6 | 369.26 | 18531.8 | 424.73 | 2952.02 | 203.74 | 8952.15 | 290.3  | 0.330 | 0.207 | 0.483 | 269 | 268 | 282 |
| YEINVLNRINDNQK     | 4 | 545.0568 | 545.0562 | 0.0026  | iTRAQ4plex@N-term;<br>iTRAQ4plex(K)@15                                                               | 99   | 13052.06 | 1558.93 | 121.8  | 1784.51 | 132.19 | 274.46  | 61.96  | 683.99  | 80.37  | 0.401 | 0.176 | 0.383 | 269 | 268 | 283 |
| YEINVLNRINDNQKVS   | 4 | 591.5833 | 591.5813 | 0.0081  | iTRAQ4plex@N-term;<br>iTRAQ4plex(K)@15                                                               | 98.6 | 6122.79  | 960.63  | 97.45  | 2879.58 | 164.84 | 108.73  | 52.15  | 209.04  | 44.83  | 0.520 | 0.113 | 0.073 | 269 | 268 | 285 |
| YEINVLNR           | 2 | 582.8285 | 582.8283 | 0.0004  | iTRAQ4plex@N-term                                                                                    | 99   | 19097.68 | 3013.5  | 169.12 | 3073.07 | 174.39 | 882.07  | 102.21 | 1296.91 | 111.41 | 0.680 | 0.293 | 0.422 | 269 | 268 | 276 |
| RNRINDNQKVSKTRGKAK | 5 | 567.5488 | 567.5491 | -0.0014 | iTRAQ4plex@N-term;<br>iTRAQ4plex(K)@9;<br>iTRAQ4plex(K)@12;<br>iTRAQ4plex(K)@16;<br>iTRAQ4plex(K)@18 | 99   | 5439.34  | 932.55  | 94.85  | 1683.78 | 130.63 | 3076.85 | 177.77 | 5546.87 | 229.4  | 0.555 | 3.299 | 3.294 | 275 | 274 | 292 |

Table S1



|                       |   |          |          |         |                                                                                                      |      |          |         |        |         |        |         |        |         |        |       |       |       |     |     |     |
|-----------------------|---|----------|----------|---------|------------------------------------------------------------------------------------------------------|------|----------|---------|--------|---------|--------|---------|--------|---------|--------|-------|-------|-------|-----|-----|-----|
| RNRINDNQKVKSTRGK      | 5 | 498.9013 | 498.9023 | -0.0048 | iTRAQ4plex@N-term;<br>iTRAQ4plex(K)@9;<br>iTRAQ4plex(K)@12;<br>iTRAQ4plex(K)@16                      | 98.9 | 1457.28  | 332.95  | 56.47  | 484.64  | 69.78  | 633.94  | 80.86  | 1011.16 | 98.13  | 0.627 | 1.904 | 2.086 | 275 | 274 | 290 |
| RNRINDNQKVKSK         | 4 | 476.7828 | 476.7842 | -0.0056 | iTRAQ4plex@N-term;<br>iTRAQ4plex(K)@9;<br>iTRAQ4plex(K)@12                                           | 99   | 2545.92  | 742.33  | 84.19  | 966.34  | 98.83  | 1330.71 | 115.7  | 1345.98 | 114.19 | 0.989 | 1.793 | 1.393 | 275 | 274 | 286 |
| NRINDNQKVKSTRGK       | 5 | 467.6804 | 467.6820 | -0.0083 | iTRAQ4plex@N-term;<br>iTRAQ4plex(K)@8;<br>iTRAQ4plex(K)@11;<br>iTRAQ4plex(K)@15                      | 99   | 11595.4  | 2747.27 | 162.4  | 4279.82 | 207.86 | 6618.56 | 260.81 | 11085   | 324.81 | 0.597 | 2.409 | 2.590 | 276 | 275 | 290 |
| NRINDNQKVKSTRGKAK     | 5 | 536.3295 | 536.3289 | 0.0032  | iTRAQ4plex@N-term;<br>iTRAQ4plex(K)@8;<br>iTRAQ4plex(K)@11;<br>iTRAQ4plex(K)@15;<br>iTRAQ4plex(K)@17 | 99   | 52590.34 | 9906.35 | 308.47 | 15753.7 | 401.46 | 31661.5 | 565.94 | 47028.9 | 671.26 | 0.673 | 3.196 | 2.985 | 276 | 275 | 292 |
| NRINDNQKVKSTRGKAKVTVG | 5 | 587.7584 | 587.7564 | 0.0102  | iTRAQ4plex@N-term;<br>iTRAQ4plex(K)@8;<br>iTRAQ4plex(K)@11;<br>iTRAQ4plex(K)@15;<br>iTRAQ4plex(K)@17 | 99   | 122105.4 | 14006.1 | 366.28 | 20423   | 466.6  | 66965.1 | 816.81 | 92213.3 | 944.56 | 0.726 | 4.781 | 4.515 | 276 | 275 | 295 |
| NRINDNQKVKSTRGKAKVT   | 5 | 576.3544 | 576.3521 | 0.0114  | iTRAQ4plex@N-term;<br>iTRAQ4plex(K)@8;<br>iTRAQ4plex(K)@11;<br>iTRAQ4plex(K)@15;<br>iTRAQ4plex(K)@17 | 99   | 73727.59 | 2227.43 | 146.06 | 3237.1  | 185.63 | 10489.9 | 322.44 | 13042.4 | 354.07 | 0.804 | 4.709 | 4.029 | 276 | 275 | 294 |
| NRINDNQKVKSK          | 4 | 437.7578 | 437.7589 | -0.0045 | iTRAQ4plex@N-term;<br>iTRAQ4plex(K)@8;<br>iTRAQ4plex(K)@11                                           | 99   | 8854.52  | 5790.24 | 234.61 | 6340.52 | 254.05 | 8397.63 | 292.05 | 10150.2 | 312.38 | 0.827 | 1.450 | 1.601 | 276 | 275 | 286 |
| NRINDNQKVKSTR         | 5 | 401.8368 | 401.8383 | -0.0078 | iTRAQ4plex@N-term;<br>iTRAQ4plex(K)@8;<br>iTRAQ4plex(K)@11                                           | 97.2 | 25316    | 2025.18 | 139.19 | 2831.54 | 170.74 | 5892.92 | 241.96 | 6209.79 | 245.08 | 0.949 | 2.910 | 2.193 | 276 | 275 | 288 |
| NRINDNQKVS            | 3 | 492.6094 | 492.6105 | -0.0032 | iTRAQ4plex@N-term;<br>iTRAQ4plex(K)@8                                                                | 99   | 275051.3 | 2499.51 | 154.22 | 2848.53 | 169.3  | 2949.37 | 172.14 | 1856.96 | 136    | 1.588 | 1.180 | 0.652 | 276 | 275 | 285 |
| RINDNQKVKSTRGKAKVTVG  | 5 | 564.9496 | 564.9478 | 0.0089  | iTRAQ4plex@N-term;<br>iTRAQ4plex(K)@7;<br>iTRAQ4plex(K)@10;<br>iTRAQ4plex(K)@14;<br>iTRAQ4plex(K)@16 | 99   | 4379.85  | 1285.25 | 110.84 | 1750.57 | 131.78 | 1450.9  | 123.11 | 1869.8  | 133.94 | 0.776 | 1.129 | 1.068 | 277 | 276 | 295 |
| RINDNQKVS             | 3 | 454.5946 | 454.5962 | -0.0047 | iTRAQ4plex@N-term;<br>iTRAQ4plex(K)@7                                                                | 99   | 15908.67 | 2988.76 | 168.17 | 2619.38 | 161.93 | 948.42  | 102.45 | 524.96  | 72.79  | 1.807 | 0.317 | 0.200 | 277 | 276 | 285 |
| DNQKVKSTRGKAK         | 5 | 436.8748 | 436.8747 | 0.0006  | iTRAQ4plex@N-term;<br>iTRAQ4plex(K)@4;<br>iTRAQ4plex(K)@7;<br>iTRAQ4plex(K)@11;<br>iTRAQ4plex(K)@13  | 99   | 658.48   | 434.78  | 64.41  | 554.9   | 74.76  | 681.06  | 83.11  | 743.9   | 84.72  | 0.916 | 1.566 | 1.341 | 280 | 279 | 292 |

Peptides were extracted from the distinct peptide list generated with ProteinPilot software by the following conditions; Accessions, P45389  
 TNNT2\_human; "Best conf (Peptide)" > 96.8 (FDR < 1%); permitted modifications, iTRAQ at N-terminus and/or Lys, oxidation at Met, methylthio at  
 Cys, PyroGlu at N-terminus; omit decoy sequence; quant annotation, Auto or Auto--shared MS/MS. The cleavage sites are indicated by the number of  
 amino acid position N-terminus to the cleavage site.

Table S2 List of catalytic subunit of calpain-I peptide generated by autolysis.

| Sequence                   | Theor z | Obs m/z  | Theor m/z  | dMass      | Modifications                                         | Best Conf (Peptide) | Intensity (Peptide) | iTRAQ114          |         | iTRAQ115          |         | iTRAQ116          |         | iTRAQ117          |         | cleavage sites |        |        |
|----------------------------|---------|----------|------------|------------|-------------------------------------------------------|---------------------|---------------------|-------------------|---------|-------------------|---------|-------------------|---------|-------------------|---------|----------------|--------|--------|
|                            |         |          |            |            |                                                       |                     |                     | C2 40min Area 114 | Err 114 | C2 20min Area 115 | Err 115 | C1 40min Area 116 | Err 116 | C1 20min Area 117 | Err 117 | Start Position | N site | C site |
| EGFEDFTGGVT                | 2       | 651.8034 | 651.802124 | 0.00251227 | iTRAQ4plex@N-term                                     | 97.4                | 232.75              | 52.01             | 22.36   | 83.98             | 28.81   | 77.74             | 28.28   | 83.92             | 28.46   | 212            | 211    | 222    |
| GAKQVNYQQGM                | 3       | 504.6011 | 504.6008   | 0.00090373 | iTRAQ4plex@N-term; iTRAQ4plex(K)@3                    | 99                  | 1524.83             | 103.65            | 31.62   | 184.83            | 44.15   | 583.33            | 76.21   | 786.17            | 86.71   | 278            | 277    | 288    |
| GAKQVNYQQGMVN              | 3       | 575.64   | 575.63794  | 0.0062921  | iTRAQ4plex@N-term; iTRAQ4plex(K)@3                    | 99                  | 1268.6              | 74.28             | 26.64   | 99.29             | 33.31   | 481.01            | 68.69   | 546.05            | 72.52   | 278            | 277    | 290    |
| SSEWNGVDPYQRDQLR           | 3       | 698.679  | 698.675537 | 1.04E-02   | iTRAQ4plex@N-term                                     | 99                  | 2246.22             | 30.62             | 17.32   | 77.7              | 31.62   | 856.57            | 90.93   | 777.97            | 87      | 311            | 310    | 326    |
| TLYEGTWRRGSTAGGCR          | 4       | 516.0027 | 516.002319 | 0.00143959 | iTRAQ4plex@N-term; Methylthio(C)@16                   | 99                  | 30560.12            | 200.53            | 43.47   | 135.62            | 40.12   | 763.53            | 86.99   | 1087.78           | 101.92  | 369            | 368    | 385    |
| YEGTWRRGSTAGGCR            | 4       | 462.4691 | 462.469391 | -0.0012174 | iTRAQ4plex@N-term; Methylthio(C)@14                   | 99                  | 1870.15             | 84.09             | 28.28   | 93.66             | 33.16   | 594.02            | 76.47   | 768.03            | 85.78   | 371            | 370    | 385    |
| EGTWRRGSTAGGCR             | 4       | 421.7019 | 421.703552 | -0.0066144 | iTRAQ4plex@N-term; Methylthio(C)@13                   | 98.5                | 9215.85             | 179.15            | 41.23   | 177.53            | 53.94   | 3779.2            | 190.5   | 3194.22           | 176.72  | 372            | 371    | 385    |
| GCRNYPATF                  | 2       | 609.7801 | 609.779419 | 0.00129446 | iTRAQ4plex@N-term; Methylthio(C)@2                    | 99                  | 3651.48             | 31.78             | 17.32   | 23.45             | 20      | 530.84            | 71.68   | 553.32            | 73.14   | 383            | 382    | 391    |
| KIRLEETDDPEDDYGGRESG       | 4       | 643.0651 | 643.06189  | 0.0130544  | iTRAQ4plex@N-term; iTRAQ4plex(K)@1                    | 99                  | 18530.33            | 84.76             | 28.28   | 63.05             | 48.47   | 5647.78           | 230.55  | 2369.25           | 156.26  | 398            | 397    | 417    |
| KIRLEETDDPEDDYGGRESGCS     | 4       | 702.0734 | 702.069092 | 0.0173239  | iTRAQ4plex@N-term; iTRAQ4plex(K)@1; Methylthio(C)@21  | 99                  | 8250.04             | 47.15             | 21.21   | 59.42             | 36.74   | 2547.83           | 154.74  | 934.88            | 98.88   | 398            | 397    | 419    |
| KIRLEETDDPEDDYGGRESGCSF    | 4       | 738.8401 | 738.836182 | 0.0155603  | iTRAQ4plex@N-term; iTRAQ4plex(K)@1; Methylthio(C)@21  | 99                  | 778.08              | 45.52             | 20.73   | 35.54             | 20      | 146.26            | 37.68   | 119.41            | 34.2    | 398            | 397    | 420    |
| KIRLEETDDPEDDYGGRESGCSFVL  | 4       | 791.8809 | 791.874329 | 2.64E-02   | iTRAQ4plex@N-term; iTRAQ4plex(K)@1; Methylthio(C)@21  | 99                  | 4486.98             | 10.55             | 10      | 9.67              | 16.12   | 534.97            | 71.47   | 403.06            | 62.92   | 398            | 397    | 422    |
| KIRLEETDDPEDDYGGRESGCSFVLA | 4       | 809.6402 | 809.633606 | 2.64E-02   | iTRAQ4plex@N-term; iTRAQ4plex(K)@1; Methylthio(C)@21  | 98                  | 2384.37             | 29.34             | 16.73   | 37.25             | 20.73   | 223.54            | 46.47   | 182.76            | 42.3    | 398            | 397    | 423    |
| ETDDPEDDYGGRESGCSFVL       | 3       | 794.3335 | 794.327026 | 0.0193533  | iTRAQ4plex@N-term; Methylthio(C)@16                   | 99                  | 508.9               | 7.34              | 8.37    | 9.08              | 10.95   | 104.36            | 31.46   | 51.2              | 22.8    | 403            | 402    | 422    |
| EVPPPELVGQPVIH             | 3       | 482.2682 | 482.268738 | -0.0016278 | iTRAQ4plex@N-term                                     | 99                  | 15905.55            | 127.8             | 34.64   | 63.02             | 44.83   | 4397              | 204.96  | 3386.03           | 182.45  | 448            | 447    | 459    |
| EVPPPELVGQPVHLK            | 3       | 610.6983 | 610.69574  | 0.00762692 | iTRAQ4plex@N-term; iTRAQ4plex(K)@14                   | 99                  | 10107.98            | 234.5             | 47      | 157.81            | 53.66   | 4165.15           | 199.97  | 3553.67           | 186.32  | 448            | 447    | 461    |
| EVPPPELVGQPVHLKRDF         | 4       | 562.8215 | 562.822754 | -0.0051386 | iTRAQ4plex@N-term; iTRAQ4plex(K)@14                   | 99                  | 1064.42             | 365.03            | 58.81   | 344.82            | 59.07   | 296.91            | 55.31   | 290.45            | 53.1    | 448            | 447    | 464    |
| EVPPPELVGQPVHLKRDFFLA      | 4       | 645.6234 | 645.620178 | 1.30E-02   | iTRAQ4plex@N-term; iTRAQ4plex(K)@14                   | 98.6                | 429.57              | 13.58             | 11.4    | 19.2              | 14.83   | 112.69            | 33.01   | 94.21             | 30.33   | 448            | 447    | 467    |
| LVGQPVHLK                  | 3       | 426.9413 | 426.942719 | -0.0042108 | iTRAQ4plex@N-term; iTRAQ4plex(K)@9                    | 99                  | 3429.74             | 92.63             | 30      | 196.84            | 54.03   | 3410.04           | 180.64  | 2548.08           | 158.28  | 453            | 452    | 461    |
| NASRRARSEQFINLR            | 4       | 452.2516 | 452.25174  | -0.0005704 | iTRAQ4plex@N-term                                     | 99                  | 21674.6             | 273.11            | 50.49   | 64.23             | 57.18   | 8178.66           | 279.44  | 6245.92           | 247.75  | 468            | 467    | 481    |
| ASRRARSEQFINLR             | 4       | 423.7404 | 423.740997 | -2.44E-03  | iTRAQ4plex@N-term                                     | 99                  | 27558.99            | 248.78            | 48.06   | 0                 | 45.08   | 6215.63           | 243.03  | 4115.01           | 201.95  | 469            | 468    | 481    |
| RARSEQFINLR                | 3       | 511.9632 | 511.962524 | 2.02E-03   | iTRAQ4plex@N-term                                     | 97.2                | 6096.15             | 477.49            | 67.59   | 671.12            | 82.45   | 1054.06           | 102.11  | 763.09            | 86.77   | 471            | 470    | 481    |
| ARSEQFINLR                 | 3       | 459.9256 | 459.928833 | -0.0096664 | iTRAQ4plex@N-term                                     | 97.6                | 640.6               | 283.65            | 52.05   | 372.93            | 60.65   | 229.75            | 48.98   | 156.39            | 39.36   | 472            | 471    | 481    |
| SEQFINLR                   | 2       | 733.394  | 733.391968 | 0.0039689  | iTRAQ4plex@N-term                                     | 99                  | 595.76              | 33.46             | 17.89   | 45.54             | 22.36   | 193.6             | 43.47   | 187.54            | 42.66   | 474            | 473    | 484    |
| EVSTRFRLPPGEYVVVPST        | 3       | 759.7563 | 759.750183 | 0.0183638  | iTRAQ4plex@N-term                                     | 99                  | 10106.15            | 21.4              | 14.14   | 6.06              | 13.78   | 388.79            | 61.55   | 484.49            | 68.18   | 482            | 481    | 500    |
| EVSTRFRLPPGEYVVVPSTF       | 3       | 808.7794 | 808.772949 | 1.93E-02   | iTRAQ4plex@N-term                                     | 99                  | 1682.09             | 3.08              | 5.48    | 7.13              | 9.49    | 72.61             | 26.45   | 62.58             | 24.69   | 482            | 481    | 501    |
| EVSTRFRLPPGEYVVVPSTFEPNK   | 4       | 759.9219 | 759.915344 | 0.0260036  | iTRAQ4plex@N-term; iTRAQ4plex(K)@24                   | 99                  | 547.65              | 19.27             | 13.41   | 4.84              | 8.94    | 76.11             | 27.38   | 109.01            | 32.24   | 482            | 481    | 505    |
| RLPPGEYVVVPST              | 3       | 519.9634 | 519.96344  | -1.20E-04  | iTRAQ4plex@N-term                                     | 99                  | 7710.44             | 281.29            | 51.57   | 232.42            | 48.57   | 154.77            | 40.74   | 235.63            | 47.43   | 488            | 487    | 500    |
| RLPPGEYVVVPSTF             | 3       | 568.9886 | 568.986206 | 7.09E-03   | iTRAQ4plex@N-term                                     | 99                  | 3805.61             | 42.01             | 20      | 48.93             | 23.23   | 207.08            | 44.71   | 145.93            | 37.94   | 488            | 487    | 501    |
| RLPPGEYVVVPSTFEPNK         | 4       | 580.077  | 580.075317 | 6.85E-03   | iTRAQ4plex@N-term; iTRAQ4plex(K)@18                   | 99                  | 1843.37             | 99.97             | 30.82   | 106.44            | 33.91   | 339.12            | 58.9    | 687.4             | 80.61   | 488            | 487    | 505    |
| VVPSTFEPNK                 | 3       | 502.2921 | 502.291962 | 4.50E-04   | iTRAQ4plex@N-term; iTRAQ4plex(K)@11                   | 98.9                | 1347.54             | 233.58            | 46.9    | 148.88            | 43.7    | 1303.63           | 111.38  | 691.2             | 83.48   | 495            | 494    | 505    |
| EGDFVLRFF                  | 2       | 637.3411 | 637.338501 | 0.00524028 | iTRAQ4plex@N-term                                     | 99                  | 13798.62            | 10.5              | 8.94    | 0                 | 93.22   | 6020.09           | 238.67  | 3508.99           | 187.44  | 506            | 505    | 514    |
| EGDFVLRFFSEKKA             | 4       | 527.05   | 527.049316 | 0.00260116 | iTRAQ4plex@N-term; iTRAQ4plex(K)@12; iTRAQ4plex(K)@1; | 99                  | 2435.59             | 10.47             | 10      | 13.44             | 26.45   | 1832.18           | 133.17  | 2007.2            | 139.08  | 506            | 505    | 519    |
| SEKAGTQELDDQVQ             | 4       | 527.7872 | 527.785339 | 0.00733037 | iTRAQ4plex@N-term; iTRAQ4plex(K)@3; iTRAQ4plex(K)@4   | 99                  | 704.6               | 250.07            | 48.57   | 183.1             | 44.83   | 552.62            | 74.02   | 665.76            | 79.99   | 515            | 514    | 529    |
| SEKAGTQELDDQVQAILPDE       | 4       | 687.3704 | 687.367249 | 1.28E-02   | iTRAQ4plex@N-term; iTRAQ4plex(K)@3; iTRAQ4plex(K)@4   | 99                  | 484.33              | 52.59             | 22.36   | 57.07             | 24.29   | 102.58            | 32.24   | 147.76            | 37.54   | 515            | 514    | 535    |
| GTQELDDQVQ                 | 2       | 638.8145 | 638.810486 | 0.00801637 | iTRAQ4plex@N-term                                     | 99                  | 534.48              | 35.04             | 18.16   | 22.34             | 15.81   | 75.3              | 27.01   | 52.56             | 22.8    | 520            | 519    | 529    |
| GTQELDDQVQAILPDE           | 3       | 638.988  | 638.985291 | 0.00809806 | iTRAQ4plex@N-term                                     | 99                  | 597.43              | 86.85             | 28.63   | 65.21             | 26.07   | 84.44             | 29.66   | 153.85            | 38.21   | 520            | 519    | 535    |
| QVLSSEEDENF                | 2       | 798.387  | 798.38147  | 0.0110631  | iTRAQ4plex@N-term                                     | 99                  | 1615.54             | 9.6               | 9.49    | 3.96              | 10      | 182.79            | 42.54   | 296.55            | 53.1    | 536            | 535    | 547    |
| RQLAGEDMEISVR              | 3       | 549.9589 | 549.958313 | 0.00175214 | iTRAQ4plex@N-term                                     | 99                  | 324.41              | 88.2              | 28.98   | 103.13            | 32.24   | 116.17            | 34.35   | 117.68            | 33.76   | 552            | 551    | 564    |
| RQLAGEDMEISVREL            | 4       | 512.2777 | 512.277527 | 7.77E-04   | iTRAQ4plex@N-term                                     | 99                  | 4537.53             | 142.59            | 36.74   | 126.82            | 37.41   | 455.54            | 68.03   | 867.3             | 90.6    | 552            | 551    | 567    |
| SIILKALE                   | 2       | 587.8889 | 587.886108 | 0.00563513 | iTRAQ4plex@N-term; iTRAQ4plex(K)@5                    | 97.2                | 455.14              | 3.98              | 6.32    | 15.03             | 14.14   | 190.78            | 42.89   | 171.65            | 40.86   | 236            | 235    | 243    |

Peptides were extracted from the distinct peptide list generated with ProteinPilot software by the following conditions; Accessions, P35750\_CAN1\_PIG; "Best conf (Peptide)" > 96.8 (FDR < 1%); permitted modifications; iTRAQ at N-terminus and/or Lys, oxidation at Met, methylthio at Cys, PyroGlu at N-terminus; omnit decoy sequence; quant annotation, Auto or Auto--shared MS/MS. The cleavage sites are indicated by the number of amino acid position N-terminus to the cleavage site.

Table S3 List of catalytic subunit of calpain-2 peptide generated by autolysis.

| Sequence             | Theor z | Obs m/z   | Theor m/z | dMass  | Modifications                                        | Best Conf (Peptide) | Intensity (Peptide) | iTRAQ114          |         | iTRAQ115          |         | iTRAQ116          |         | iTRAQ117          |         | cleavage sites |        |        |
|----------------------|---------|-----------|-----------|--------|------------------------------------------------------|---------------------|---------------------|-------------------|---------|-------------------|---------|-------------------|---------|-------------------|---------|----------------|--------|--------|
|                      |         |           |           |        |                                                      |                     |                     | C2 40min Area 114 | Err 114 | C2 20min Area 115 | Err 115 | C1 40min Area 116 | Err 116 | C1 20min Area 117 | Err 117 | Start Position | N site | C site |
| AGIAAKLAKDREAAEGLG   | 3       | 725.0975  | 725.0937  | 0.0114 | iTRAQ4plex@N-term; iTRAQ4plex(K)@6; iTRAQ4plex(K)@9  | 99                  | 575.54              | 301.86            | 53.66   | 378.8             | 60.65   | 14.81             | 20      | 112.46            | 32.4    | 2              | 1      | 19     |
| QDPSFPAIPALGFKEL     | 3       | 702.3951  | 702.3889  | 0.0186 | iTRAQ4plex@N-term; iTRAQ4plex(K)@15                  | 99                  | 404.53              | 155.24            | 38.34   | 138.09            | 37.01   | 12.55             | 14.14   | 8.98              | 9.49    | 47             | 46     | 63     |
| QDPSFPAIPALGFKELGPYS | 3       | 837.1227  | 837.1121  | 0.0318 | iTRAQ4plex@N-term; iTRAQ4plex(K)@15                  | 99                  | 590.92              | 156.89            | 38.59   | 161.98            | 39.87   | 7                 | 13.04   | 28.74             | 16.43   | 47             | 46     | 67     |
| ADPQFIIGGATRTDICQ    | 3       | 666.0008  | 665.9965  | 0.0130 | iTRAQ4plex@N-term; Methylthio(C)@16                  | 99                  | 479.19              | 130.63            | 35.07   | 82.35             | 28.98   | 8.35              | 11.83   | 35.21             | 18.16   | 83             | 82     | 99     |
| NEEILARVVPLN         | 3       | 504.2960  | 504.2952  | 0.0025 | iTRAQ4plex@N-term                                    | 99                  | 367.05              | 131.48            | 35.35   | 142.17            | 37.41   | 32.83             | 20      | 36.11             | 18.71   | 117            | 116    | 128    |
| EEILARVVPLN          | 3       | 466.2812  | 466.2809  | 0.0010 | iTRAQ4plex@N-term                                    | 99                  | 345.14              | 255.22            | 49.08   | 193.43            | 44.15   | 45.95             | 23.45   | 30.01             | 17.32   | 118            | 117    | 128    |
| CPSWNTIDPEE          | 2       | 740.8185  | 740.8139  | 0.0092 | iTRAQ4plex@N-term; Methylthio(C)@1                   | 97.5                | 401.17              | 108.35            | 32.09   | 116.9             | 33.91   | 22.48             | 17.03   | 36.73             | 18.71   | 301            | 300    | 311    |
| CPSWNTIDPEERERLT     | 3       | 712.6746  | 712.6705  | 0.0123 | iTRAQ4plex@N-term; Methylthio(C)@1                   | 97.7                | 1034.12             | 410.21            | 62.28   | 343.44            | 58.47   | 26.13             | 21.21   | 19.99             | 14.14   | 301            | 300    | 316    |
| KMDGNWRRGSTAGGCR     | 4       | 522.2595  | 522.2578  | 0.0067 | iTRAQ4plex@N-term; iTRAQ4plex(K)@1; Methylthio(C)@15 | 99                  | 7969.86             | 3269.49           | 176.04  | 3129.68           | 175.59  | 76.3              | 50.69   | 117.43            | 33.91   | 360            | 359    | 375    |
| MDGNWRRGSTAGGCR      | 4       | 454.2093  | 454.2086  | 0.0028 | iTRAQ4plex@N-term; Methylthio(C)@14                  | 99                  | 32283.41            | 3624.3            | 185.5   | 3742.6            | 191.6   | 122.17            | 57.7    | 81.96             | 29.15   | 361            | 360    | 375    |
| STAGGCRNYPNTF        | 3       | 526.5707  | 526.5701  | 0.0018 | iTRAQ4plex@N-term; Methylthio(C)@6                   | 99                  | 2034.24             | 1043.17           | 99.43   | 989.01            | 98.88   | 113.4             | 41.23   | 193.76            | 43.01   | 369            | 368    | 381    |
| GCRNYPNTF            | 2       | 631.2857  | 631.2823  | 0.0067 | iTRAQ4plex@N-term; Methylthio(C)@2                   | 97.7                | 4413.26             | 668.97            | 79.74   | 726.75            | 84.55   | 151.1             | 43.58   | 208.61            | 44.72   | 373            | 372    | 381    |
| WMNPQYLIKLE          | 3       | 574.9904  | 574.9879  | 0.0076 | iTRAQ4plex@N-term; iTRAQ4plex(K)@9                   | 99                  | 1269.93             | 662.2             | 79.42   | 789.41            | 87.62   | 9.37              | 23.45   | 20.33             | 14.14   | 382            | 381    | 392    |
| LIKLEEEDEDEDEGESGCTF | 3       | 874.3916  | 874.3835  | 0.0242 | iTRAQ4plex@N-term; iTRAQ4plex(K)@3; Methylthio(C)@18 | 99                  | 2589.97             | 370.16            | 59.41   | 456.2             | 66.55   | 2.45              | 17.03   | 11.29             | 10.49   | 388            | 387    | 407    |
| EEDEDEDEGESGCTF      | 2       | 940.8442  | 940.8257  | 0.0368 | iTRAQ4plex@N-term; Methylthio(C)@13                  | 99                  | 370.6               | 51.14             | 22.13   | 74.37             | 26.83   | 10.85             | 12.25   | 17.78             | 13.04   | 393            | 392    | 407    |
| EEDEDEDEGESGCTFLVG   | 2       | 1075.4250 | 1075.4127 | 0.0254 | iTRAQ4plex@N-term; Methylthio(C)@13                  | 99                  | 1027.24             | 44.5              | 20.73   | 82.91             | 28.1    | 0                 | 5.41    | 6.67              | 7.74    | 393            | 392    | 410    |
| HTIGFGIYVPEELSGQT    | 3       | 707.6977  | 707.6922  | 0.0165 | iTRAQ4plex@N-term                                    | 99                  | 600.76              | 88.73             | 28.98   | 78.16             | 27.92   | 20.44             | 15.49   | 14.07             | 11.83   | 427            | 426    | 444    |
| FGIYVPEELSGQT        | 2       | 856.9360  | 856.9286  | 0.0147 | iTRAQ4plex@N-term                                    | 99                  | 1836.88             | 180.54            | 41.47   | 214.11            | 45.6    | 0                 | 11.19   | 4.55              | 6.32    | 431            | 430    | 444    |
| FGIYVPEELSGQTNIH     | 3       | 693.0216  | 693.0168  | 0.0144 | iTRAQ4plex@N-term                                    | 99                  | 486.23              | 108.43            | 32.09   | 113.77            | 33.46   | 18.89             | 15.81   | 23.9              | 15.16   | 431            | 430    | 447    |
| EVPEELSGQT           | 2       | 616.8135  | 616.8100  | 0.0070 | iTRAQ4plex@N-term                                    | 99                  | 19496.37            | 3703.43           | 187.67  | 4119.18           | 200.92  | 565.48            | 88.42   | 535.5             | 72.38   | 435            | 434    | 444    |
| EVPEELSGQTN          | 2       | 673.8362  | 673.8314  | 0.0095 | iTRAQ4plex@N-term                                    | 99                  | 474.49              | 87.93             | 28.98   | 115.92            | 33.61   | 26.59             | 17.89   | 19.13             | 13.78   | 435            | 434    | 445    |
| EVPEELSGQTNIH        | 3       | 532.9391  | 532.9377  | 0.0041 | iTRAQ4plex@N-term                                    | 99                  | 14240.96            | 2918.34           | 166.68  | 3377.17           | 181.41  | 78.8              | 53      | 330.62            | 55.85   | 435            | 434    | 447    |
| EVPEELSGQTNIHL       | 3       | 570.6332  | 570.6324  | 0.0023 | iTRAQ4plex@N-term                                    | 97.7                | 678.18              | 224.85            | 46.36   | 304.32            | 54.4    | 59.8              | 27.38   | 56.38             | 23.45   | 435            | 434    | 448    |
| EVPEELSGQTNIHLS      | 3       | 599.6448  | 599.6431  | 0.0051 | iTRAQ4plex@N-term                                    | 99                  | 3614.22             | 954.95            | 95.17   | 942.5             | 96.53   | 184.64            | 48.26   | 192.54            | 43.24   | 435            | 434    | 449    |
| ELSGQTNIH            | 2       | 571.8015  | 571.7997  | 0.0035 | iTRAQ4plex@N-term                                    | 99                  | 474.99              | 124.43            | 34.49   | 169.47            | 40.98   | 135.6             | 37.68   | 174.21            | 40.86   | 439            | 438    | 447    |
| RARERSDTFINLR        | 3       | 593.3361  | 593.3349  | 0.0036 | iTRAQ4plex@N-term                                    | 99                  | 13938.38            | 1591.17           | 122.9   | 1640.91           | 127.06  | 212.1             | 54.67   | 198.85            | 44.16   | 457            | 456    | 469    |
| SDTFINLR             | 2       | 555.3087  | 555.3072  | 0.0030 | iTRAQ4plex@N-term                                    | 98.9                | 1243.84             | 626.68            | 77.13   | 637.37            | 79.36   | 150.27            | 43.01   | 230.2             | 46.9    | 462            | 461    | 469    |
| EVLNRFKLPPEYILVPST   | 4       | 615.8612  | 615.8581  | 0.0126 | iTRAQ4plex@N-term; iTRAQ4plex(K)@7                   | 99                  | 4518.47             | 543.41            | 71.82   | 558.86            | 74.02   | 3.57              | 18.97   | 7.9               | 8.94    | 470            | 469    | 488    |
| RFKLPPGEYILVPST      | 3       | 669.0674  | 669.0623  | 0.0152 | iTRAQ4plex@N-term; iTRAQ4plex(K)@3                   | 99                  | 5457.06             | 501.21            | 68.91   | 469               | 68.11   | 50.85             | 27.38   | 18.65             | 14.14   | 474            | 473    | 488    |
| RFKLPPGEYILVPSTF     | 3       | 718.0912  | 718.0851  | 0.0181 | iTRAQ4plex@N-term; iTRAQ4plex(K)@3                   | 99                  | 1586.83             | 94.21             | 30      | 123.5             | 34.64   | 14.65             | 14.49   | 8.92              | 9.49    | 474            | 473    | 489    |
| KLPPGEYILVPST        | 3       | 568.0066  | 568.0058  | 0.0023 | iTRAQ4plex@N-term; iTRAQ4plex(K)@1                   | 99                  | 12366.31            | 2962.89           | 167.73  | 3063.41           | 173.35  | 116.35            | 54.03   | 175.26            | 41.23   | 476            | 475    | 488    |
| KLPPGEYILVPSTF       | 3       | 617.0317  | 617.0286  | 0.0091 | iTRAQ4plex@N-term; iTRAQ4plex(K)@1                   | 99                  | 5708.46             | 1358.57           | 113.65  | 1493.9            | 120.77  | 0                 | 29.42   | 46.19             | 20.97   | 476            | 475    | 489    |
| KLPPGEYILVPSTFEPNK   | 4       | 616.1112  | 616.1071  | 0.0164 | iTRAQ4plex@N-term; iTRAQ4plex(K)@1; iTRAQ4plex(K)@18 | 99                  | 506.54              | 97.64             | 30.65   | 164.68            | 39.74   | 7.29              | 13.04   | 21.1              | 14.14   | 476            | 475    | 493    |
| FEPNKDGF CIRVF       | 3       | 674.3385  | 674.3336  | 0.0147 | iTRAQ4plex@N-term; iTRAQ4plex(K)@5; Methylthio(C)@10 | 99                  | 3682.38             | 1039.45           | 99.28   | 1018.11           | 99.99   | 0                 | 38.91   | 12.52             | 10.49   | 489            | 488    | 502    |
| EPNKDGF CIRVF        | 3       | 625.3151  | 625.3108  | 0.0129 | iTRAQ4plex@N-term; iTRAQ4plex(K)@4; Methylthio(C)@9  | 99                  | 1452.65             | 926.6             | 93.9    | 1059.99           | 101.62  | 0                 | 24.55   | 9.76              | 10      | 490            | 489    | 502    |
| DGDFCIRVFSEK         | 3       | 583.9602  | 583.9562  | 0.0118 | iTRAQ4plex@N-term; Methylthio(C)@5; iTRAQ4plex(K)@12 | 98.5                | 282.06              | 189.53            | 42.54   | 245.12            | 48.78   | 18.38             | 17.89   | 22.68             | 14.83   | 494            | 493    | 505    |
| GAEEVESNGSLQK        | 3       | 545.9539  | 545.9525  | 0.0044 | iTRAQ4plex@N-term; iTRAQ4plex(K)@13                  | 99                  | 1137.74             | 477.53            | 67.44   | 568.81            | 74.49   | 55.47             | 30      | 148.35            | 37.41   | 268            | 267    | 280    |
| AAEVESNGSLQK         | 3       | 526.9476  | 526.9453  | 0.0068 | iTRAQ4plex@N-term; iTRAQ4plex(K)@12                  | 99                  | 436.61              | 645.2             | 78.22   | 630.79            | 79.17   | 218.04            | 49.49   | 172.94            | 41.23   | 269            | 268    | 280    |

Peptides were extracted from the distinct peptide list generated with ProteinPilot software by the following conditions; Accessions, P17655\_CAN2\_HUMAN+ "Best conf (Peptide)" > 96.8 (FDR < 1%); permitted modifications, iTRAQ at N-terminus and/or Lys, oxidation at Met, methylthio at Cys, PyroGlu at N-terminus; omit decoy sequence; quant annotation, Auto or Auto-shared MS/MS. The cleavage sites are indicated by the number of amino acid position N-terminus to the cleavage site.

Table S4 List of catalytic subunit of calpain-2 peptide generated by calpain-1.

| Sequence         | Theor<br>z | Obs m/z  | Theor m/z  | dMass      | Modifications        | Best Conf<br>(Peptide) | Intensity<br>(Peptide) | Start<br>Position | cleavage sites |        |
|------------------|------------|----------|------------|------------|----------------------|------------------------|------------------------|-------------------|----------------|--------|
|                  |            |          |            |            |                      |                        |                        |                   | N site         | C site |
| AGIAAKLAKDRE     | 3          | 414.9066 | 414.910339 | -0.0112571 |                      | 99                     | 2464.38                | 2                 | 1              | 13     |
| AGIAAKLAKDREA    | 2          | 657.3751 | 657.380432 | -0.0106074 |                      | 99                     | 214.29                 | 2                 | 1              | 14     |
| AGIAAKLAKDREAA   | 3          | 462.2634 | 462.268402 | -0.0150501 |                      | 97.1                   | 162.14                 | 2                 | 1              | 15     |
| QDYEARNECLE      | 2          | 733.3085 | 733.316834 | -1.67E-02  | Gln->pyro-Glu@N-term | 99                     | 141.54                 | 30                | 29             | 41     |
| ALRNECLE         | 2          | 474.2309 | 474.234375 | -0.0069766 |                      | 96.6                   | 642.75                 | 34                | 33             | 41     |
| ADPQFIIGGATR     | 2          | 623.3245 | 623.332947 | -0.0168406 |                      | 99                     | 197.22                 | 83                | 82             | 94     |
| SVTGAEEVESNGSLQK | 2          | 817.8907 | 817.897034 | -0.0126896 |                      | 99                     | 179.59                 | 265               | 264            | 280    |
| GAEEVESNGSLQK    | 2          | 674.316  | 674.322998 | -0.0139829 |                      | 99                     | 1737.13                | 268               | 267            | 280    |
| GAEEVESNGSLQKLI  | 2          | 787.4117 | 787.407044 | 0.00929541 |                      | 94.6                   | 90.65504               | 268               | 267            | 282    |
| AEEVESNGSLQK     | 2          | 645.8053 | 645.812256 | -0.0138815 |                      | 99                     | 509.35                 | 269               | 268            | 280    |
| SDTYKKWKLTK      | 3          | 466.5935 | 466.597748 | -1.28E-02  |                      | 98.5                   | 185.01                 | 350               | 349            | 360    |
| EVPEELSGQTNIH    | 2          | 726.8458 | 726.851868 | -1.21E-02  |                      | 99                     | 332.2                  | 435               | 434            | 447    |
| RARERSDTFINLR    | 4          | 409.2228 | 409.227478 | -0.0187056 |                      | 99                     | 622.3                  | 457               | 456            | 469    |
| SEKKADYQAVDDEIE  | 3          | 580.5996 | 580.603882 | -0.0127404 |                      | 99                     | 358.77                 | 503               | 502            | 517    |

Peptides were extracted from the distinct peptide list generated with ProteinPilot software by the following conditions; Accessions, P17655\_CAN2\_HUMAN; "Best conf (Peptide)" > 93.7 (FDR < 1%); permitted modifications, oxidation at Met, methylthio at Cys, PyroGlu at N-terminus; omit decoy sequence. The cleavage sites are indicated by the number of amino acid position N-terminus to the cleavage site.

Table S5 List of catalytic subunit of calpain-2 peptide generated by calpain-2.

| Sequence              | Theor<br>z | Obs m/z  | Theor m/z  | dMass      | Modifications        | Best Conf<br>(Peptide) | Intensity<br>(Peptide) | cleavage sites    |        |        |
|-----------------------|------------|----------|------------|------------|----------------------|------------------------|------------------------|-------------------|--------|--------|
|                       |            |          |            |            |                      |                        |                        | Start<br>Position | N site | C site |
| AGIAAKLAKDRE          | 3          | 414.9066 | 414.910339 | -0.0112571 |                      | 99                     | 8548.28                | 2                 | 1      | 13     |
| AGIAAKLAKDREA         | 2          | 657.377  | 657.380432 | -0.0068232 |                      | 99                     | 475.89                 | 2                 | 1      | 14     |
| AGIAAKLAKDREAAEG      | 3          | 524.2845 | 524.289795 | -1.58E-02  |                      | 99                     | 395.14                 | 2                 | 1      | 17     |
| AGIAAKLAKDREAAEGLG    | 3          | 580.9879 | 580.991638 | -0.0110812 |                      | 99                     | 2455.7                 | 2                 | 1      | 19     |
| LAKDREAAEGLG          | 2          | 615.3237 | 615.327881 | -0.0082568 |                      | 99                     | 385.88                 | 8                 | 7      | 19     |
| QDYEARNECLE           | 2          | 733.3146 | 733.316834 | -0.0045113 | Gln->pyro-Glu@N-term | 99                     | 2231.57                | 30                | 29     | 41     |
| QDYEARNECLE           | 2          | 741.8257 | 741.830078 | -0.0088436 |                      | 99                     | 158.8104               | 30                | 29     | 41     |
| YEALRNECLE            | 2          | 620.2841 | 620.287354 | -6.45E-03  |                      | 98.4                   | 1480.94                | 32                | 31     | 41     |
| LGFKELGPYS            | 2          | 555.7902 | 555.795105 | -0.0098196 |                      | 97.5                   | 145.09                 | 58                | 57     | 67     |
| ADPQFIIGGATR          | 2          | 623.3278 | 623.332947 | -0.0102488 |                      | 99                     | 945.59                 | 83                | 82     | 94     |
| NEEILARVPLN*          | 2          | 683.8857 | 683.888062 | -0.0048049 |                      | 99                     | 348.93                 | 117               | 116    | 129    |
| EEILARVPLN*           | 2          | 626.8638 | 626.866638 | -0.0057007 |                      | 99                     | 347.75                 | 118               | 117    | 129    |
| ADSEAITFQK            | 2          | 555.2729 | 555.277283 | -0.0088303 |                      | 99                     | 194.49                 | 248               | 247    | 257    |
| ADSEAITFQKLV          | 2          | 661.3483 | 661.353516 | -0.0104293 |                      | 99                     | 5.191046               | 248               | 247    | 259    |
| QKLVKGHAY             | 2          | 513.7865 | 513.790161 | -7.37E-03  | Gln->pyro-Glu@N-term | 99                     | 153.29                 | 256               | 255    | 264    |
| QKLVKGHAYSVT          | 2          | 657.3591 | 657.364258 | -0.0103491 | Gln->pyro-Glu@N-term | 99                     | 685.6                  | 256               | 255    | 267    |
| QKLVKGHAYSVTG         | 3          | 457.5812 | 457.585754 | -0.0136071 | Gln->pyro-Glu@N-term | 97.2                   | 1019.28                | 256               | 255    | 268    |
| LVKGHAYSVT            | 2          | 537.7962 | 537.80072  | -0.0090901 |                      | 99                     | 988.86                 | 258               | 257    | 267    |
| KGHAYSVTGAEEVESNG     | 3          | 578.9306 | 578.935852 | -0.0156771 |                      | 99                     | 488.12                 | 260               | 259    | 276    |
| KGHAYSVTGAEEVESNGSLQK | 4          | 548.5161 | 548.521118 | -1.99E-02  |                      | 99                     | 397.47                 | 260               | 259    | 280    |
| GHAYSVTGAEVEE         | 2          | 674.7999 | 674.804443 | -0.0089736 |                      | 99                     | 777.84                 | 261               | 260    | 273    |
| GHAYSVTGAEEVESNG      | 2          | 803.8486 | 803.8526   | -0.0081031 |                      | 99                     | 733.41                 | 261               | 260    | 276    |
| GHAYSVTGAEEVESNGSLQK  | 3          | 688.3229 | 688.327393 | -0.0135282 |                      | 99                     | 993.59                 | 261               | 260    | 280    |
| YSVTGAEEVESNG         | 2          | 671.2895 | 671.293884 | -0.0087778 |                      | 99                     | 398.87                 | 264               | 263    | 276    |

|                    |   |          |            |            |                |      |          |     |     |     |
|--------------------|---|----------|------------|------------|----------------|------|----------|-----|-----|-----|
| YSVTGAEEVESNGSLQK  | 2 | 899.4255 | 899.428711 | -0.0064381 |                | 99   | 673.75   | 264 | 263 | 280 |
| GAEEVESNGSLQ       | 2 | 610.2709 | 610.275513 | -0.0092298 |                | 99   | 291.49   | 268 | 267 | 279 |
| GAEEVESNGSLQK      | 2 | 674.3188 | 674.322998 | -0.0083676 |                | 99   | 7915.38  | 268 | 267 | 280 |
| AEEVESNGSLQK       | 2 | 645.8059 | 645.812256 | -0.0126608 |                | 99   | 2992.52  | 269 | 268 | 280 |
| AEEVESNGSLQKLI     | 2 | 758.8945 | 758.896301 | -0.0036647 |                | 99   | 32.00719 | 269 | 268 | 282 |
| NTIDPEERERLT       | 2 | 736.8654 | 736.870606 | -0.0104033 |                | 95.5 | 796.46   | 305 | 304 | 316 |
| SDTYKKWKLTK        | 3 | 466.5936 | 466.597748 | -0.0124879 |                | 99   | 4211.74  | 350 | 349 | 360 |
| MDGNWRRGSTAGGCR    | 4 | 406.6821 | 406.686127 | -1.61E-02  |                | 98.7 | 3865.3   | 361 | 360 | 375 |
| GSTAGGCRNYPNTF     | 2 | 722.8145 | 722.817322 | -0.0056364 |                | 99   | 447.72   | 368 | 367 | 381 |
| STAGGCRNYPNTF      | 2 | 694.3031 | 694.30658  | -0.0069998 |                | 99   | 7062.97  | 369 | 368 | 381 |
| TAGGCRNYPNTF       | 2 | 650.7864 | 650.790588 | -0.0084187 |                | 97.8 | 780.71   | 370 | 369 | 381 |
| AGGCRNYPNTF        | 2 | 600.2626 | 600.266724 | -0.0083476 |                | 99   | 1353.15  | 371 | 370 | 381 |
| GCRNYPNTF          | 2 | 536.2333 | 536.237488 | -0.0083639 |                | 97   | 7899.22  | 373 | 372 | 381 |
| NYPNTFWMNPQY       | 2 | 795.8376 | 795.837708 | -0.000296  | Oxidation(M)@8 | 98.3 | 183.89   | 376 | 375 | 387 |
| WMNPQYLIKLE        | 2 | 725.869  | 725.873596 | -0.0091382 | Oxidation(M)@2 | 98.5 | 119.07   | 382 | 381 | 392 |
| EVPEELSGQTNIH      | 2 | 726.8472 | 726.851868 | -0.0093321 |                | 99   | 3385.67  | 435 | 434 | 447 |
| EVPEELSGQTNIHLS    | 2 | 826.9072 | 826.909912 | -5.43E-03  |                | 99   | 569.44   | 435 | 434 | 449 |
| EVPEELSGQTNIHLSK   | 3 | 594.3038 | 594.307373 | -1.08E-02  |                | 99   | 718.55   | 435 | 434 | 450 |
| VPEELSGQTNIH       | 2 | 662.327  | 662.330627 | -0.0071443 |                | 99   | 125.05   | 436 | 435 | 447 |
| ELSGQTNIHLS        | 2 | 599.8017 | 599.806763 | -0.010125  |                | 96.3 | 584.28   | 439 | 438 | 449 |
| NIHLSKNFFLTN       | 2 | 724.3888 | 724.388245 | 0.00108632 |                | 99   | 198.06   | 445 | 444 | 456 |
| RARERSDTFINLR      | 4 | 409.2236 | 409.227478 | -0.0155317 |                | 99   | 29740.79 | 457 | 456 | 469 |
| ARERSDTFINLR       | 3 | 493.2626 | 493.267181 | -0.0137421 |                | 98.6 | 708.2    | 458 | 457 | 469 |
| RERSDTFINLR        | 3 | 469.5834 | 469.588135 | -0.014226  |                | 99   | 746.42   | 459 | 458 | 469 |
| KLPPGEYILVPST      | 2 | 707.4008 | 707.403015 | -0.0044346 |                | 98.3 | 1799.97  | 476 | 475 | 488 |
| KLPPGEYILVPSTFEPNK | 3 | 677.0349 | 677.03833  | -0.0102718 |                | 99   | 810.62   | 476 | 475 | 493 |
| EYILVPSTFEPNK      | 2 | 768.8992 | 768.900879 | -0.0033734 |                | 99   | 339.14   | 481 | 480 | 493 |
| DGDFCIRVF          | 2 | 536.2465 | 536.250061 | -0.0070267 |                | 99   | 1231.63  | 494 | 493 | 502 |
| SEKKADYQAVDDEIE    | 3 | 580.6001 | 580.603882 | -0.0112755 |                | 95.7 | 625.41   | 503 | 502 | 517 |

Table S5

|                |   |          |            |            |                 |      |        |     |     |     |
|----------------|---|----------|------------|------------|-----------------|------|--------|-----|-----|-----|
| EDAEISAFELQ    | 2 | 626.2889 | 626.290588 | -3.46E-03  |                 | 99   | 200.68 | 544 | 543 | 554 |
| REIDVDRSGTMNS  | 3 | 499.2271 | 499.23169  | -0.0137635 | Oxidation(M)@11 | 97.7 | 708.66 | 612 | 611 | 624 |
| REIDVDRSGTMNSY | 3 | 553.5823 | 553.586121 | -0.0116013 | Oxidation(M)@11 | 99   | 347.3  | 612 | 611 | 625 |
| NSYEMRKALE     | 2 | 620.7983 | 620.803162 | -0.0097671 |                 | 99   | 151.87 | 623 | 622 | 632 |

Peptides were extracted from the distinct peptide list generated with ProteinPilot software by the following conditions; Accessions, P17655\_CAN2\_HUMAN; "Best conf (Peptide)" > 94.1 (FDR < 1%); permitted modifications, oxidation at Met, methylthio at Cys, PyroGlu at N-terminus; omit decoy sequence. The cleavage sites were described with number of amino acid position of N-terminus of the cleavage site. Bold letter, product of CuT cleavage. \*, Peptides produced by cleavage at least one of the CuT sites.

Table S6 List of peptide of calpain small subunit generated by C2.

| Sequence                              | Theor<br>z | Obs m/z  | Theor m/z  | dMass  | Modifications                         | Best Conf<br>(Peptide) | Intensity<br>(Peptide) | Intensity of iTRAQ |         |                      |         | (C1:CS/C2)<br>115/114 | cleavage sites    |        |        |
|---------------------------------------|------------|----------|------------|--------|---------------------------------------|------------------------|------------------------|--------------------|---------|----------------------|---------|-----------------------|-------------------|--------|--------|
|                                       |            |          |            |        |                                       |                        |                        | C2<br>Area 114     | Err 114 | C1:CS+C2<br>Area 115 | Err 115 |                       | Start<br>Position | N site | C site |
| GNVLGGLISG                            | 2          | 515.8048 | 515.804321 | 0.0010 | iTRAQ4plex@N-term                     | 99                     | 4736.72                | 437.34             | 64.33   | 383.18               | 61.8    | 0.8762                | 26                | 25     | 35     |
| GNVLGGLIS                             | 2          | 487.294  | 487.293579 | 0.0009 | iTRAQ4plex@N-term                     | 93.6                   | 5535.94                | 92.84              | 30      | 186.99               | 42.42   | 2.0141                | 26                | 25     | 34     |
| GNVLGGLISGAGGG                        | 2          | 636.8575 | 636.855042 | 0.0049 | iTRAQ4plex@N-term                     | 99                     | 4.49E+02               | 83.72              | 28.28   | 110.88               | 33.16   | 1.3244                | 26                | 25     | 39     |
| GNVLGGLISGAGGGGG                      | 2          | 722.3922 | 722.387268 | 0.0099 | iTRAQ4plex@N-term                     | 99                     | 457.2                  | 51.18              | 22.36   | 122.41               | 34.64   | 2.3918                | 26                | 25     | 42     |
| GNVLGGLISGAGGGGGGGGGGGGGGGGGGGGTAMRI  | 3          | 1000.842 | 1000.83105 | 0.0335 | iTRAQ4plex@N-term;<br>Oxidation(M)@34 | 99                     | 4045.49                | 290.47             | 52.15   | 106.26               | 33.91   | 0.3658                | 26                | 25     | 63     |
| GNVLGGLISGAGGGGG                      | 2          | 665.3687 | 665.365784 | 0.0059 | iTRAQ4plex@N-term                     | 99                     | 368.01                 | 52.02              | 22.36   | 83.16                | 28.28   | 1.5986                | 26                | 25     | 40     |
| GNVLGGLISGAGGGGGGGGGGGGGGGGGGGGTAM    | 3          | 854.4099 | 854.400818 | 0.0273 | iTRAQ4plex@N-term;<br>Oxidation(M)@34 | 99                     | 445.47                 | 52.03              | 22.36   | 82.81                | 28.28   | 1.5916                | 26                | 25     | 59     |
| GNVLGGLISGAGGGGG                      | 2          | 693.8796 | 693.876526 | 0.0061 | iTRAQ4plex@N-term                     | 99                     | 430.89                 | 73.83              | 26.45   | 70.74                | 26.45   | 0.9581                | 26                | 25     | 41     |
| GLISGAGGGGGGGGGGGGGGGGGGGGTAMRILG     | 3          | 854.0919 | 854.084961 | 0.0209 | iTRAQ4plex@N-term;<br>Oxidation(M)@29 | 99                     | 2101.57                | 113.45             | 33.16   | 229.81               | 46.9    | 2.0257                | 31                | 30     | 63     |
| GLISGAGGGGGGGGGGGGGGGGGGGGTAMRILG     | 3          | 848.7609 | 848.753296 | 0.0229 | iTRAQ4plex@N-term                     | 99                     | 2828.63                | 108.27             | 32.4    | 220.34               | 45.82   | 2.0351                | 31                | 30     | 63     |
| GLISGAGGGGGGGGGGGGGGGGGGGGTAMRILGGVIS | 3          | 972.8314 | 972.820251 | 0.0335 | iTRAQ4plex@N-term;<br>Oxidation(M)@29 | 99                     | 2181.53                | 165.2              | 39.36   | 75.75                | 28.28   | 0.4585                | 31                | 30     | 67     |
| GAGGGGGGGGGGGGGGGGGGGGTAMRILGGVIS     | 3          | 844.0885 | 844.081421 | 0.0212 | iTRAQ4plex@N-term                     | 98.3                   | 431.94                 | 68.56              | 25.49   | 65.65                | 25.49   | 1.3285                | 35                | 34     | 67     |
| RILGGVISAISE                          | 2          | 679.9129 | 679.909851 | 0.0062 | iTRAQ4plex@N-term                     | 99                     | 4494.52                | 71.87              | 26.45   | 161.37               | 39.36   | 2.2453                | 58                | 57     | 69     |
| GGVISAISEAAA                          | 2          | 595.3326 | 595.330872 | 0.0034 | iTRAQ4plex@N-term                     | 99                     | 6077.85                | 207.84             | 44.71   | 344.64               | 57.61   | 1.6582                | 61                | 60     | 72     |
| GGVISAISE                             | 2          | 488.7753 | 488.775208 | 0.0002 | iTRAQ4plex@N-term                     | 99                     | 3342.44                | 324.02             | 55.67   | 447.74               | 66.55   | 1.3818                | 61                | 60     | 69     |
| GGVISAISEAAAQ                         | 2          | 659.364  | 659.360168 | 0.0077 | iTRAQ4plex@N-term                     | 99                     | 3293.22                | 115.87             | 33.16   | 117.21               | 34.78   | 1.0116                | 61                | 60     | 73     |
| GGVISAISEAA                           | 2          | 559.8141 | 559.812317 | 0.0035 | iTRAQ4plex@N-term                     | 96.7                   | 1097.93                | 61.82              | 24.49   | 128.39               | 35.35   | 1.1608                | 61                | 60     | 71     |
| GVISAISEAAA                           | 2          | 566.8226 | 566.820129 | 0.0049 | iTRAQ4plex@N-term                     | 99                     | 46522.62               | 1889.21            | 134.78  | 3097.11              | 173.84  | 1.6394                | 62                | 61     | 72     |
| GVISAISEAAAQ                          | 2          | 630.8527 | 630.849426 | 0.0066 | iTRAQ4plex@N-term                     | 99                     | 38860.03               | 746.97             | 84.31   | 851.75               | 94.22   | 1.1403                | 62                | 61     | 73     |
| GVISAISEAAAQY                         | 2          | 712.3846 | 712.381104 | 0.0070 | iTRAQ4plex@N-term                     | 99                     | 15034.59               | 247.36             | 48.47   | 258.8                | 51.57   | 1.0462                | 62                | 61     | 74     |
| GVISAISEAAAQYNPEPPPPRTH               | 4          | 637.3359 | 637.333435 | 0.0097 | iTRAQ4plex@N-term                     | 99                     | 4200.14                | 217.92             | 45.38   | 176.52               | 42.42   | 0.8100                | 62                | 61     | 84     |
| GVISAISEAA                            | 2          | 531.3023 | 531.301575 | 0.0014 | iTRAQ4plex@N-term                     | 99                     | 12039.59               | 387.17             | 60.98   | 616.21               | 78.41   | 1.5916                | 62                | 61     | 71     |
| SAISEAAAQYNPEPPPPRTH                  | 4          | 570.0421 | 570.039978 | 0.0086 | iTRAQ4plex@N-term                     | 99                     | 6206.82                | 600.3              | 75.75   | 816.5                | 89.26   | 1.3602                | 65                | 64     | 84     |
| SAISEAAAQY                            | 2          | 577.7958 | 577.794128 | 0.0033 | iTRAQ4plex@N-term                     | 99                     | 2181.22                | 218.14             | 45.93   | 416.45               | 63.47   | 1.9091                | 65                | 64     | 74     |
| SAISEAAAQYNPEPPPPRTHYSNIE             | 4          | 721.6119 | 721.606201 | 0.0227 | iTRAQ4plex@N-term                     | 99                     | 2592.05                | 178.28             | 41.23   | 217.76               | 46.36   | 1.2214                | 65                | 64     | 89     |
| SAISEAAAQYNP                          | 2          | 683.3455 | 683.34198  | 0.0071 | iTRAQ4plex@N-term                     | 99                     | 215.58                 | 62.83              | 24.49   | 81.06                | 28.28   | 1.2901                | 65                | 64     | 76     |
| SAISEAAAQYNPEPPPPR                    | 3          | 680.3525 | 680.348633 | 0.0115 | iTRAQ4plex@N-term                     | 99                     | 724.08                 | 84.43              | 28.28   | 77.92                | 28.28   | 0.9229                | 65                | 64     | 82     |
| AISEAAAQYNPEPPPPRTHYSNIE              | 4          | 699.8536 | 699.848206 | 0.0215 | iTRAQ4plex@N-term                     | 99                     | 28308.37               | 1741.62            | 128.12  | 1200.24              | 112.59  | 0.6892                | 66                | 65     | 89     |
| AISEAAAQYNPEPPPPRTHY                  | 3          | 785.067  | 785.061279 | 0.0172 | iTRAQ4plex@N-term                     | 99                     | 6567.16                | 403.38             | 62.2    | 613.58               | 77.19   | 1.5211                | 66                | 65     | 85     |
| AISEAAAQYNPEPPPPR                     | 3          | 651.3402 | 651.338013 | 0.0067 | iTRAQ4plex@N-term                     | 99                     | 8048.93                | 392                | 60.98   | 389.42               | 64.26   | 0.9934                | 66                | 65     | 82     |
| AISEAAAQYN                            | 2          | 591.3002 | 591.299561 | 0.0012 | iTRAQ4plex@N-term                     | 99                     | 431.14                 | 158.07             | 38.72   | 156.88               | 39.99   | 0.9925                | 66                | 65     | 75     |
| AISEAAAQYNPEPPPPRTH                   | 3          | 685.0244 | 685.020569 | 0.0116 | iTRAQ4plex@N-term                     | 99                     | 851.74                 | 78.63              | 27.38   | 97.18                | 31.62   | 1.2359                | 66                | 65     | 83     |
| AISEAAAQYNPEPPPPRTH                   | 4          | 548.2839 | 548.281982 | 0.0077 | iTRAQ4plex@N-term                     | 99                     | 52430.34               | 3588.3             | 185.18  | 4824.9               | 218.6   | 1.3446                | 66                | 65     | 84     |
| AISEAAAQYNP                           | 2          | 639.8285 | 639.825989 | 0.0051 | iTRAQ4plex@N-term                     | 99                     | 2126.86                | 336.58             | 56.74   | 463.91               | 67.37   | 1.3783                | 66                | 65     | 76     |
| AISEAAAQY                             | 2          | 534.2795 | 534.278137 | 0.0027 | iTRAQ4plex@N-term                     | 84.6                   | 13888.22               | 1006.52            | 98.27   | 1546.48              | 124.52  | 0.8172                | 66                | 65     | 74     |
| SEAAAQYNPEPPPPRTH                     | 3          | 669.3361 | 669.33313  | 0.0090 | iTRAQ4plex@N-term                     | 99                     | 3567.48                | 103.88             | 31.62   | 174.25               | 40.98   | 1.6774                | 68                | 67     | 84     |
| SEAAAQYNPEPPPPRTHYSNIE                | 4          | 653.8213 | 653.817871 | 0.0136 | iTRAQ4plex@N-term                     | 99                     | 929.99                 | 90.4               | 29.15   | 50.57                | 23.45   | 0.5594                | 68                | 67     | 89     |



|                       |   |          |            |         |                                                            |      |          |         |        |          |        |        |     |     |     |
|-----------------------|---|----------|------------|---------|------------------------------------------------------------|------|----------|---------|--------|----------|--------|--------|-----|-----|-----|
| EAAAQYNPEPPPPRTH      | 3 | 640.3251 | 640.322449 | 0.0079  | iTRAQ4plex@N-term                                          | 99   | 45016.88 | 2049.47 | 140.8  | 3953.21  | 198.44 | 1.9289 | 69  | 68  | 84  |
| EAAAQYNPEPPPPRTHY     | 3 | 694.6813 | 694.67688  | 0.0132  | iTRAQ4plex@N-term                                          | 99   | 4681.07  | 312.11  | 54.86  | 550.93   | 73.2   | 1.7652 | 69  | 68  | 85  |
| EAAAQYNPEPPPPR        | 3 | 560.9557 | 560.953552 | 0.0063  | iTRAQ4plex@N-term                                          | 99   | 5091.77  | 273.44  | 51.08  | 348.84   | 61.96  | 1.2757 | 69  | 68  | 82  |
| EAAAQYNPEPPPPRTH      | 3 | 594.6382 | 594.636169 | 0.0061  | iTRAQ4plex@N-term                                          | 99   | 502.5    | 63.37   | 24.49  | 56.32    | 24.49  | 1.1048 | 69  | 68  | 83  |
| EAAAQYNPEPPPPRTHYSNIE | 4 | 632.0628 | 632.059875 | 0.0117  | iTRAQ4plex@N-term                                          | 99   | 13730.26 | 981.98  | 96.32  | 785.28   | 93.15  | 1.2828 | 69  | 68  | 89  |
| AAAQYNPEPPPPRTHY      | 3 | 651.6649 | 651.66272  | 0.0067  | iTRAQ4plex@N-term                                          | 99   | 6510.52  | 708.47  | 82.21  | 890.49   | 93.42  | 1.2569 | 70  | 69  | 85  |
| AAAQYNPEPPPPR         | 3 | 517.9394 | 517.939392 | 0.0000  | iTRAQ4plex@N-term                                          | 99   | 2363.39  | 462.06  | 66.4   | 584.87   | 76.47  | 1.2658 | 70  | 69  | 82  |
| AAAQYNPEPPPPRTH       | 3 | 597.3105 | 597.308228 | 0.0067  | iTRAQ4plex@N-term                                          | 99   | 68535.54 | 5895.74 | 238.25 | 10038.05 | 312.49 | 1.7026 | 70  | 69  | 84  |
| AAAQYNPEPPPPRTHYSNIE  | 4 | 599.8018 | 599.799255 | 0.0103  | iTRAQ4plex@N-term                                          | 99   | 27416.76 | 3313.51 | 176.67 | 2188.58  | 152.56 | 2.5575 | 70  | 69  | 89  |
| AAQYNPEPPPPRTH        | 3 | 573.6305 | 573.629211 | 0.0038  | iTRAQ4plex@N-term                                          | 99   | 11294.81 | 727.21  | 84.55  | 1966.99  | 138.07 | 2.7048 | 71  | 70  | 84  |
| AAQYNPEPPPPRTHY       | 3 | 627.986  | 627.983643 | 0.0071  | iTRAQ4plex@N-term                                          | 99   | 853.37   | 105.18  | 31.62  | 113.88   | 33.91  | 1.0827 | 71  | 70  | 85  |
| AAQYNPEPPPPRTHYSNIE   | 3 | 775.7231 | 775.717529 | 0.0167  | iTRAQ4plex@N-term                                          | 99   | 4232.98  | 246.69  | 48.37  | 241.37   | 50.49  | 1.7006 | 71  | 70  | 89  |
| AQYNPEPPPPRTH         | 3 | 549.951  | 549.950195 | 0.0024  | iTRAQ4plex@N-term                                          | 99   | 31981.35 | 2555.15 | 157.49 | 5365.05  | 230.75 | 2.0997 | 72  | 71  | 84  |
| AQYNPEPPPPR           | 3 | 470.5818 | 470.581299 | 0.0014  | iTRAQ4plex@N-term                                          | 99   | 1376.9   | 479.6   | 68.11  | 920.14   | 95.28  | 1.9186 | 72  | 71  | 82  |
| AQYNPEPPPPRTHYSNIE    | 3 | 752.0434 | 752.038513 | 0.0147  | iTRAQ4plex@N-term                                          | 99   | 1.34E+04 | 805.87  | 87.51  | 868.16   | 96.84  | 1.0773 | 72  | 71  | 89  |
| AQYNPEPPPPRTHY        | 3 | 604.3071 | 604.304626 | 0.0075  | iTRAQ4plex@N-term                                          | 99   | 2999.97  | 272.23  | 50.98  | 353.24   | 59.41  | 1.2976 | 72  | 71  | 85  |
| QYNPEPPPPRTHY         | 3 | 580.6279 | 580.625549 | 0.0071  | iTRAQ4plex@N-term                                          | 99   | 4579.42  | 769.57  | 86.07  | 1299.14  | 112.59 | 1.6881 | 73  | 72  | 85  |
| QYNPEPPPPRTHYSNIE     | 3 | 728.3635 | 728.359436 | 0.0122  | iTRAQ4plex@N-term                                          | 99   | 23990.46 | 2356.64 | 148.81 | 1285.01  | 124.28 | 0.5453 | 73  | 72  | 89  |
| QYNPEPPPPRTH          | 3 | 526.2719 | 526.271118 | 0.0023  | iTRAQ4plex@N-term                                          | 99   | 54199.75 | 2963.05 | 168.85 | 4955.74  | 222    | 1.6725 | 73  | 72  | 84  |
| YNPEPPPPRTHY          | 3 | 537.9401 | 537.939392 | 0.0022  | iTRAQ4plex@N-term                                          | 99   | 5981.46  | 867.48  | 90.93  | 1056.43  | 102.89 | 1.2178 | 74  | 73  | 85  |
| NPEPPPPRTHYSNIE       | 3 | 631.3216 | 631.318787 | 0.0083  | iTRAQ4plex@N-term                                          | 99   | 29642.94 | 1060.84 | 100.14 | 874.6    | 98.63  | 0.8244 | 75  | 74  | 89  |
| NPEPPPPRTH            | 3 | 429.2299 | 429.230499 | -0.0018 | iTRAQ4plex@N-term                                          | 98.8 | 37432.26 | 1116.59 | 103.28 | 1483.85  | 122.82 | 1.3289 | 75  | 74  | 84  |
| YSNIEANEESEVR         | 3 | 561.9373 | 561.936279 | 0.0032  | iTRAQ4plex@N-term                                          | 99   | 3043.63  | 535.7   | 71.4   | 616.59   | 78.22  | 1.1510 | 85  | 84  | 97  |
| SNIEANEESEVR          | 2 | 760.8741 | 760.86908  | 0.0100  | iTRAQ4plex@N-term                                          | 99   | 6591.9   | 1152.58 | 105.1  | 1711.75  | 128.86 | 1.4851 | 86  | 85  | 97  |
| IEANEESEVR            | 2 | 660.3355 | 660.331604 | 0.0078  | iTRAQ4plex@N-term                                          | 99   | 2213.1   | 272.42  | 50.98  | 344.56   | 60.16  | 1.2648 | 88  | 87  | 97  |
| AQLAGDDMEVSATELM      | 2 | 912.9361 | 912.927429 | 0.0173  | iTRAQ4plex@N-term                                          | 99   | 6465.81  | 249.69  | 49.08  | 452.19   | 66.32  | 1.8110 | 104 | 103 | 119 |
| AQLAGDDMEVSATELM      | 2 | 920.9344 | 920.924866 | 0.0190  | iTRAQ4plex@N-term;<br>Oxidation(M)@16                      | 99   | 4557.59  | 220.74  | 45.82  | 245.35   | 49.59  | 1.1115 | 104 | 103 | 119 |
| AQLAGDDMEVSATELM      | 2 | 920.9333 | 920.924866 | 0.0168  | iTRAQ4plex@N-term;<br>Oxidation(M)@8                       | 99   | 3862.25  | 168.21  | 39.99  | 185.84   | 43.01  | 1.1048 | 104 | 103 | 119 |
| AQLAGDDMEVSATELM      | 2 | 928.9322 | 928.922363 | 0.0197  | iTRAQ4plex@N-term;<br>Oxidation(M)@16                      | 99   | 1453.12  | 73.14   | 26.45  | 102.47   | 31.62  | 1.4010 | 104 | 103 | 119 |
| AQLAGDDMEVSA          | 2 | 675.8231 | 675.820007 | 0.0062  | iTRAQ4plex@N-term                                          | 99   | 2173.6   | 87.22   | 29.15  | 198.38   | 44.71  | 1.4010 | 104 | 103 | 115 |
| AQLAGDDMEVS           | 2 | 640.3039 | 640.301453 | 0.0049  | iTRAQ4plex@N-term                                          | 89.8 | 5.80E+02 | 146.81  | 37.41  | 179.68   | 42.42  | 1.0925 | 104 | 103 | 114 |
| NILNKVTRHPDLK         | 5 | 416.6607 | 416.661072 | -0.0018 | iTRAQ4plex@N-term;<br>iTRAQ4plex(K)@5;<br>iTRAQ4plex(K)@14 | 94.9 | 1920.33  | 474.41  | 67.22  | 563.93   | 75.75  | 1.5667 | 120 | 119 | 133 |
| KVVTRHPDLK            | 4 | 407.0104 | 407.011017 | -0.0025 | iTRAQ4plex@N-term;<br>iTRAQ4plex(K)@1;<br>iTRAQ4plex(K)@10 | 99   | 4932.73  | 1305    | 111.65 | 1733.74  | 131.43 | 1.3285 | 124 | 123 | 133 |
| RHPDLKTDGFGIDTCR      | 4 | 542.0283 | 542.026306 | 0.0081  | iTRAQ4plex@N-term;<br>Methylthio(C)@15                     | 99   | 1388.45  | 296.16  | 53.1   | 343.79   | 58.47  | 1.1608 | 128 | 127 | 143 |
| TDGFGIDTCR            | 2 | 637.788  | 637.784912 | 0.0062  | iTRAQ4plex@N-term;<br>Methylthio(C)@9                      | 99   | 4935.2   | 538.35  | 71.68  | 690.61   | 85.54  | 1.2828 | 134 | 133 | 143 |
| TDGFGIDTC             | 2 | 559.7353 | 559.734375 | 0.0018  | iTRAQ4plex@N-term;<br>Methylthio(C)@9                      | 99   | 2636.04  | 119.4   | 33.91  | 203.05   | 46.9   | 1.7006 | 134 | 133 | 142 |

Table S6

|                  |   |          |            |        |                                                            |    |         |        |        |         |        |        |     |     |     |
|------------------|---|----------|------------|--------|------------------------------------------------------------|----|---------|--------|--------|---------|--------|--------|-----|-----|-----|
| SMVAVMDSDTTGKLG  | 3 | 600.6454 | 600.642212 | 0.0095 | iTRAQ4plex@N-term;<br>iTRAQ4plex(K)@13                     | 99 | 2729.55 | 265.54 | 50.49  | 416.01  | 63.87  | 1.5667 | 144 | 143 | 158 |
| SMVAVMDSDTTGKLG  | 3 | 605.9765 | 605.973877 | 0.0079 | iTRAQ4plex@N-term;<br>Oxidation(M)@2;<br>iTRAQ4plex(K)@13  | 99 | 688.91  | 223.41 | 45.93  | 171.55  | 42.42  | 0.7679 | 144 | 143 | 158 |
| SMVAVMDSDTTGKLG  | 3 | 605.977  | 605.973877 | 0.0094 | iTRAQ4plex@N-term;<br>Oxidation(M)@6;<br>iTRAQ4plex(K)@13  | 99 | 473.09  | 222.21 | 45.93  | 226.96  | 48.06  | 1.0214 | 144 | 143 | 158 |
| VAVMDSDTTGKLG    | 3 | 527.9521 | 527.951416 | 0.0021 | iTRAQ4plex@N-term;<br>iTRAQ4plex(K)@11                     | 99 | 1816.49 | 646.72 | 78.41  | 706.57  | 85.25  | 1.0925 | 146 | 145 | 158 |
| KQFDTRSGTICS     | 3 | 597.9609 | 597.958435 | 0.0073 | iTRAQ4plex@N-term;<br>iTRAQ4plex(K)@1;<br>Methylthio(C)@12 | 99 | 6056.26 | 1766.6 | 130.06 | 2539.99 | 156.76 | 0.7679 | 179 | 178 | 191 |
| SELPGAFAAGFHLNEH | 3 | 657.3259 | 657.322327 | 0.0108 | iTRAQ4plex@N-term                                          | 99 | 290.65  | 84.63  | 28.28  | 69.16   | 26.45  | 0.8172 | 190 | 189 | 206 |
| EAAGFHLNEHLY     | 3 | 515.5927 | 515.59198  | 0.0022 | iTRAQ4plex@N-term                                          | 99 | 3867.03 | 147.94 | 38.07  | 378.35  | 60.98  | 2.5575 | 197 | 196 | 208 |

Peptides were extracted from the distinct peptide list generated with ProteinPilot software by the following conditions; Accessions, P04632|CPNS1\_HUMAN; "Best conf (Peptide)" > 81.6 (FDR < 1%); permitted modifications, iTRAQ at N-terminus and/or Lys, oxidation at Met, methylthio at Cys, PyroGlu at N-terminus; permitted quant annotation, Auto and Auto--shared MS/MS with intensity higher than 50; start position, > 25. The cleavage sites are indicated by the number of amino acid position N-terminus to the cleavage site.

Table S7 List of C2 specific peptide in PC domain generated by C2 in the presence and absence of C1:CS.

| Sequence               | Theor z | Obs m/z  | Theor m/z  | dMass    | Modifications                       | Best Conf (Peptide) | Intensity (Peptide) | Intensity of iTRAQ |         |                   |         | (C1:CS/C2) 115/114 | Start Position | cleavage sites |        |
|------------------------|---------|----------|------------|----------|-------------------------------------|---------------------|---------------------|--------------------|---------|-------------------|---------|--------------------|----------------|----------------|--------|
|                        |         |          |            |          |                                     |                     |                     | C2 Area 114        | Err 114 | C1:CS+C2 Area 115 | Err 115 |                    |                | N site         | C site |
| YEALRNECLE             | 2       | 715.3372 | 715.332214 | 0.00996  | iTRAQ4plex@N-term; Methylthio(C)@8  | 99                  | 3837.29             | 890.56             | 92.07   | 1034.12           | 100.43  | 1.161202           | 32             | 31             | 41     |
| ALRNECLEAGTLF          | 3       | 542.9427 | 542.941528 | 0.0035   | iTRAQ4plex@N-term; Methylthio(C)@6  | 99                  | 1569.16             | 137.93             | 36.05   | 93.25             | 30.82   | 0.6760676          | 34             | 33             | 46     |
| NECLEAGTLF             | 2       | 643.8008 | 643.797485 | 0.00657  | iTRAQ4plex@N-term; Methylthio(C)@3  | 99                  | 21449.41            | 2579.44            | 156.57  | 2780.32           | 164.81  | 1.077877           | 37             | 36             | 46     |
| CLEAGTLF               | 2       | 522.2553 | 522.254761 | 1.14E-03 | iTRAQ4plex@N-term; Methylthio(C)@1  | 98.8                | 362.62              | 108.65             | 32.09   | 102.41            | 31.78   | 0.9425679          | 39             | 38             | 46     |
| QDPSFPAIPSAALGF        | 2       | 795.9238 | 795.917847 | 0.01196  | iTRAQ4plex@N-term                   | 99                  | 6486.7              | 605.71             | 75.55   | 414.55            | 64.64   | 0.6844034          | 47             | 46             | 60     |
| QDPSFPAIPSA            | 2       | 693.875  | 693.872925 | 0.00418  | iTRAQ4plex@N-term                   | 99                  | 925.33              | 113.49             | 32.86   | 127.69            | 35.35   | 1.125121           | 47             | 46             | 58     |
| QDPSFPAIPSA            | 2       | 637.3348 | 637.330872 | 0.0078   | iTRAQ4plex@N-term                   | 99                  | 6183.22             | 891.74             | 92.24   | 1129.36           | 105.06  | 1.266468           | 47             | 46             | 57     |
| QDPSFPAIPSAALG         | 2       | 722.3873 | 722.383667 | 0.00738  | iTRAQ4plex@N-term                   | 99                  | 4798.67             | 444.07             | 65.03   | 520.49            | 71.19   | 1.17209            | 47             | 46             | 59     |
| EEILARVVPLNQ           | 3       | 621.6841 | 621.679993 | 0.01225  | iTRAQ4plex@N-term; iTRAQ4plex(K)@15 | 99                  | 766.96              | 265.71             | 50.19   | 257.84            | 50.49   | 0.9703813          | 47             | 46             | 58     |
| QDPSFPAIPSAALGFK       | 3       | 702.3926 | 702.388855 | 1.11E-02 | iTRAQ4plex@N-term; iTRAQ4plex(K)@15 | 99                  | 3146.49             | 477.59             | 66.92   | 216.18            | 47.74   | 0.4526477          | 47             | 46             | 61     |
| QDPSFPAIPSAALGFKEL     | 3       | 837.1195 | 837.112061 | 0.02228  | iTRAQ4plex@N-term; iTRAQ4plex(K)@15 | 99                  | 1151.55             | 368.69             | 58.64   | 72.96             | 29.83   | 0.1978898          | 47             | 46             | 63     |
| QDPSFPAIPSAALGFKELGPYS | 3       | 695.3885 | 695.383972 | 0.00903  | iTRAQ4plex@N-term                   | 99                  | 1559.4              | 434.3              | 64.18   | 424.6             | 64.72   | 0.9776652          | 83             | 82             | 103    |
| CSIDITSA               | 2       | 623.3119 | 623.310303 | 0.00485  | iTRAQ4plex@N-term; Methylthio(C)@16 | 99                  | 468.82              | 99.54              | 30.65   | 75.71             | 27.56   | 0.7605987          | 83             | 82             | 90     |
| ADPQFIIGGATR           | 2       | 665.9995 | 665.99646  | 0.00914  | iTRAQ4plex@N-term; Methylthio(C)@16 | 99                  | 4565.21             | 845.72             | 89.32   | 611.75            | 78.41   | 0.7233482          | 83             | 82             | 94     |
| ADPQFIIGGATRTDIC       | 3       | 584.6768 | 584.676025 | 0.00231  | iTRAQ4plex@N-term                   | 99                  | 422.55              | 98.4               | 30.49   | 79.28             | 28.28   | 0.805691           | 116            | 115            | 131    |
| ADPQFIIGGATRTDICQ      | 3       | 546.9827 | 546.981384 | 4.10E-03 | iTRAQ4plex@N-term                   | 99                  | 5280.49             | 963.74             | 95.75   | 1084.81           | 102.94  | 1.125625           | 117            | 116            | 133    |
| LNEEILARVVPLNQ         | 3       | 504.2952 | 504.295166 | 8.34E-05 | iTRAQ4plex@N-term                   | 99                  | 5005.4              | 1025.03            | 98.93   | 1332.01           | 113.61  | 1.299484           | 117            | 116            | 130    |
| NEEILARVVPLNQ          | 3       | 508.9678 | 508.967041 | 0.00226  | iTRAQ4plex@N-term                   | 99                  | 5113.72             | 483.46             | 67.89   | 590.8             | 75.82   | 1.222025           | 118            | 117            | 130    |
| NEEILARVVPLN           | 3       | 698.9216 | 698.917664 | 7.84E-03 | iTRAQ4plex@N-term                   | 99                  | 9617.32             | 1591.4             | 123.07  | 1830.22           | 133.51  | 1.150069           | 118            | 117            | 129    |
| EEILARVVPLN            | 2       | 724.3567 | 724.352356 | 0.0087   | iTRAQ4plex@N-term                   | 99                  | 1829.28             | 157.94             | 38.72   | 162.88            | 39.99   | 1.031278           | 129            | 128            | 139    |
| QSFQENYAGIF            | 2       | 660.3257 | 660.323059 | 5.26E-03 | iTRAQ4plex@N-term                   | 99                  | 1385.96             | 178.79             | 41.23   | 194.47            | 43.58   | 1.087701           | 130            | 129            | 140    |
| SFQENYAGIF             | 2       | 555.7979 | 555.796265 | 0.00327  | iTRAQ4plex@N-term                   | 99                  | 3364.3              | 442.14             | 64.88   | 511.27            | 70.56   | 1.156353           | 136            | 135            | 145    |
| AGIFHFQF               | 2       | 720.3437 | 720.339233 | 0.00891  | iTRAQ4plex@N-term                   | 99                  | 676.19              | 115.54             | 33.16   | 132.68            | 36.05   | 1.148347           | 167            | 166            | 174    |
| FVHSAEGSEFW            | 2       | 646.8085 | 646.805054 | 0.00689  | iTRAQ4plex@N-term                   | 99                  | 1396.01             | 252.39             | 49.08   | 325.13            | 56.21   | 1.288205           | 168            | 167            | 178    |
| VHSAEGSEFW             | 2       | 631.7825 | 631.779297 | 0.00633  | iTRAQ4plex@N-term; Methylthio(C)@1  | 99                  | 697.2               | 121                | 33.91   | 129.86            | 36.05   | 1.073223           | 191            | 190            | 200    |
| CYEALSGGATT            | 2       | 518.9536 | 518.951721 | 5.68E-03 | iTRAQ4plex@N-term; iTRAQ4plex(K)@11 | 94                  | 288.93              | 142.99             | 36.87   | 158.34            | 39.36   | 1.10735            | 208            | 207            | 218    |
| TGGIAEWYELK            | 3       | 698.8936 | 698.889343 | 0.00849  | iTRAQ4plex@N-term; iTRAQ4plex(K)@9  | 99                  | 1319.25             | 296.06             | 52.91   | 246.34            | 49.59   | 0.8320611          | 210            | 209            | 220    |

|                      |   |          |            |          |                                                             |      |          |         |        |         |        |           |     |     |     |
|----------------------|---|----------|------------|----------|-------------------------------------------------------------|------|----------|---------|--------|---------|--------|-----------|-----|-----|-----|
| GIAEWYELK            | 2 | 500.2341 | 500.234009 | 1.95E-04 | iTRAQ4plex@N-term;<br>Methylthio(C)@1                       | 96.1 | 2060.67  | 559.21  | 73.06  | 725.34  | 84.01  | 1.29708   | 240 | 239 | 248 |
| CSIDITSAADS          | 2 | 636.7867 | 636.782043 | 9.27E-03 | iTRAQ4plex@N-term;<br>Methylthio(C)@1                       | 99   | 310.41   | 52.2    | 22.36  | 75.26   | 27.38  | 1.441762  | 240 | 239 | 250 |
| CSIDITSAADSEAI       | 2 | 793.3699 | 793.363953 | 0.01188  | iTRAQ4plex@N-term;<br>Methylthio(C)@1                       | 99   | 843.54   | 57.43   | 23.45  | 82.47   | 28.28  | 1.436009  | 240 | 239 | 253 |
| CSIDITSAADSEAIT      | 2 | 843.8964 | 843.887756 | 0.01731  | iTRAQ4plex@N-term;<br>Methylthio(C)@1                       | 99   | 4034.38  | 293.43  | 52.43  | 120.41  | 36.05  | 0.4103534 | 240 | 239 | 254 |
| CSIDITSAADSE         | 2 | 701.3077 | 701.303345 | 0.00867  | iTRAQ4plex@N-term;<br>Methylthio(C)@1                       | 99   | 2912.74  | 277.72  | 51.47  | 350.3   | 58.39  | 1.261342  | 240 | 239 | 251 |
| CSIDITSAAD           | 2 | 593.2691 | 593.266052 | 0.00615  | iTRAQ4plex@N-term;<br>Methylthio(C)@1                       | 99   | 718.64   | 73.6    | 26.45  | 81.09   | 28.28  | 1.101766  | 240 | 239 | 249 |
| IDITSAADSEAIT        | 2 | 725.8792 | 725.873291 | 0.01182  | iTRAQ4plex@N-term                                           | 99   | 727      | 73.28   | 26.45  | 96.5    | 30.82  | 1.316867  | 242 | 241 | 254 |
| IDITSAADSEAITF       | 2 | 799.4129 | 799.407532 | 0.01079  | iTRAQ4plex@N-term                                           | 99   | 727.29   | 57.81   | 23.45  | 64.27   | 25.1   | 1.111745  | 242 | 241 | 255 |
| SAADSEAITF           | 2 | 578.2878 | 578.286133 | 0.00329  | iTRAQ4plex@N-term                                           | 99   | 349.51   | 51.61   | 22.36  | 102.79  | 31.62  | 1.991668  | 246 | 245 | 255 |
| ADSEAITFQKLV         | 3 | 537.3062 | 537.306152 | 0.00015  | iTRAQ4plex@N-term;<br>iTRAQ4plex(K)@10                      | 99   | 728.63   | 125.75  | 34.64  | 158.1   | 39.36  | 1.257257  | 248 | 247 | 259 |
| ADSEAITFQKLVK        | 3 | 628.0416 | 628.038513 | 0.00937  | iTRAQ4plex@N-term;<br>iTRAQ4plex(K)@10;<br>iTRAQ4plex(K)@13 | 99   | 689.64   | 238.39  | 47.53  | 227.06  | 47.43  | 0.9524728 | 248 | 247 | 260 |
| GHAYSVTGAEVEESNGSLQK | 4 | 588.5512 | 588.548401 | 0.01128  | iTRAQ4plex@N-term;<br>iTRAQ4plex(K)@20                      | 99   | 1051.4   | 283.8   | 51.95  | 317.69  | 55.76  | 1.119415  | 261 | 260 | 280 |
| GHAYSVTGAEVEE        | 2 | 746.8579 | 746.855469 | 0.00493  | iTRAQ4plex@N-term                                           | 99   | 586.73   | 73.81   | 26.45  | 70.92   | 26.45  | 0.9608454 | 261 | 260 | 273 |
| GHAYSVTGAEVEESNG     | 2 | 875.9103 | 875.903625 | 0.01325  | iTRAQ4plex@N-term                                           | 99   | 1112.14  | 63.27   | 24.49  | 60.91   | 24.49  | 0.9626995 | 261 | 260 | 276 |
| YSVTGAEVEESNG        | 2 | 743.3503 | 743.34491  | 0.01074  | iTRAQ4plex@N-term                                           | 99   | 3123.82  | 292.62  | 52.91  | 406.11  | 62.6   | 1.387841  | 264 | 263 | 276 |
| YSVTGAEVEESNGSLQK    | 3 | 696.0284 | 696.022949 | 1.64E-02 | iTRAQ4plex@N-term;<br>iTRAQ4plex(K)@17                      | 99   | 2602.5   | 1483.94 | 118.39 | 1163.04 | 107.97 | 0.7837514 | 264 | 263 | 280 |
| YSVTGAEVEE           | 2 | 614.2995 | 614.296692 | 0.0056   | iTRAQ4plex@N-term                                           | 87.4 | 563.99   | 148.84  | 37.41  | 85.36   | 30     | 0.5735018 | 264 | 263 | 273 |
| SVTGAEVEESNG         | 2 | 661.8165 | 661.813232 | 0.00657  | iTRAQ4plex@N-term                                           | 99   | 1683.8   | 149.6   | 37.81  | 200.18  | 44.15  | 1.338102  | 265 | 264 | 276 |
| SVTGAEVEESNGSLQK     | 3 | 641.6721 | 641.668518 | 0.01089  | iTRAQ4plex@N-term;<br>iTRAQ4plex(K)@16                      | 99   | 1916.66  | 705.15  | 81.54  | 496.37  | 70.98  | 0.7039211 | 265 | 264 | 280 |
| GAEVEESNGSLQK        | 3 | 545.9534 | 545.952454 | 0.00295  | iTRAQ4plex@N-term;<br>iTRAQ4plex(K)@13                      | 99   | 21285.25 | 3548.08 | 183.66 | 3890.71 | 195.01 | 1.096568  | 268 | 267 | 280 |
| GAEVEESNGSLQKLI      | 3 | 621.3462 | 621.341797 | 0.0131   | iTRAQ4plex@N-term;<br>iTRAQ4plex(K)@13                      | 99   | 7761.72  | 999.49  | 97.4   | 1023.85 | 100.19 | 1.024372  | 268 | 267 | 282 |
| GAEVEESNGSLQ         | 2 | 682.3307 | 682.326538 | 0.00834  | iTRAQ4plex@N-term                                           | 99   | 2207.57  | 134.96  | 36.05  | 230.57  | 47     | 1.708432  | 268 | 267 | 279 |
| GAEVEESNG            | 2 | 518.2404 | 518.239197 | 0.00246  | iTRAQ4plex@N-term                                           | 99   | 1741.18  | 281.11  | 51.47  | 192.64  | 44.15  | 0.6852834 | 268 | 267 | 276 |
| AEEVESNGSLQ          | 2 | 653.8187 | 653.815796 | 5.87E-03 | iTRAQ4plex@N-term                                           | 99   | 2339.59  | 179.81  | 41.35  | 196.63  | 44.04  | 1.093543  | 269 | 268 | 279 |
| AEEVESNGSLQK         | 3 | 526.9456 | 526.945313 | 0.00097  | iTRAQ4plex@N-term;<br>iTRAQ4plex(K)@12                      | 99   | 17513.49 | 7454.23 | 265.95 | 7503.43 | 271.4  | 1.0066    | 269 | 268 | 280 |
| AEEVESNGSLQKLI       | 3 | 602.3381 | 602.334656 | 0.01021  | iTRAQ4plex@N-term;<br>iTRAQ4plex(K)@12                      | 99   | 3039.28  | 721.91  | 82.69  | 663.5   | 81.04  | 0.9190897 | 269 | 268 | 282 |
| CPSWNTIDPEERERLT     | 3 | 712.6747 | 712.670532 | 0.01246  | iTRAQ4plex@N-term;<br>Methylthio(C)@1                       | 99   | 8194.83  | 2695.38 | 160.1  | 2985.08 | 170.97 | 1.10748   | 301 | 300 | 316 |

Table S7

|              |   |          |            |          |                                       |      |         |        |       |        |       |           |     |     |     |
|--------------|---|----------|------------|----------|---------------------------------------|------|---------|--------|-------|--------|-------|-----------|-----|-----|-----|
| CPSWNTIDPEE  | 2 | 740.8179 | 740.813904 | 0.00799  | iTRAQ4plex@N-term;<br>Methylthio(C)@1 | 99   | 5948.75 | 693.28 | 80.98 | 596.33 | 76.87 | 0.8601575 | 301 | 300 | 311 |
| RRHEDGEFWMSF | 3 | 586.2725 | 586.270935 | 4.81E-03 | iTRAQ4plex@N-term;<br>Oxidation(M)@10 | 84.7 | 2279.83 | 135.13 | 36.05 | 222.46 | 46.36 | 1.646267  | 317 | 316 | 328 |

Peptides were extracted from the distinct peptide list generated with ProteinPilot software by the following conditions; Accessions, P04632|CPNS1\_HUMAN; "Best conf (Peptide)" > 81.6 (FDR < 1%); permitted modifications, iTRAQ at N-terminus and/or Lys, oxidation at Met, methylthio at Cys, PyroGlu at N-terminus; permitted quant annotation, Auto and Auto--shared MS/MS with intensity higher than 50; start position, > 25. The cleavage sites are indicated by the number of amino acid position N-terminus to the cleavage site.

Table S8 List of common peptide among C1 and C2 generated by C2.

| Sequence  | Theor |          | Theor m/z  | dMass    | Modifications                         | Best Conf (Peptide) | Intensity (Peptide) | Intensity of iTRAQ |         |                   |         | (C1:CS/C2) 115/114 | Start Position | cleavage sites |        |
|-----------|-------|----------|------------|----------|---------------------------------------|---------------------|---------------------|--------------------|---------|-------------------|---------|--------------------|----------------|----------------|--------|
|           | z     | Obs m/z  |            |          |                                       |                     |                     | C2 Area 114        | Err 114 | C1:CS+C2 Area 115 | Err 115 |                    |                | N site         | C site |
| AAIASLTL  | 2     | 452.2855 | 452.285217 | 5.64E-04 | iTRAQ4plex@N-term                     | 99                  | 1080.82             | 187                | 42.42   | 313.03            | 54.86   | 1.673957           | 109            | 108            | 116    |
| AIASLTLN  | 2     | 473.7881 | 473.788116 | -6.2E-05 | iTRAQ4plex@N-term                     | 99                  | 5309.32             | 795.69             | 87.45   | 1290.96           | 111.34  | 1.622441           | 110            | 109            | 117    |
| GATRTDICQ | 2     | 577.7757 | 577.774353 | 0.00268  | iTRAQ4plex@N-term;<br>Methylthio(C)@8 | 99                  | 2086.58             | 249.4              | 48.78   | 315.5             | 55.58   | 1.265036           | 91             | 90             | 99     |
| AAIASLTLN | 2     | 509.308  | 509.306671 | 0.00268  | iTRAQ4plex@N-term                     | 99                  | 1387.04             | 262.25             | 49.99   | 318.72            | 55.76   | 1.215329           | 109            | 108            | 117    |

Peptides were extracted from the distinct peptide list generated with ProteinPilot software by the following conditions; Accessions, P04632|CPNS1\_HUMAN; "Best conf (Peptide)" > 81.6 (FDR < 1%); permitted modifications, iTRAQ at N-terminus and/or Lys, oxidation at Met, methylthio at Cys, PyroGlu at N-terminus; permitted quant annotation, Auto and Auto--shared MS/MS with intensity higher than 50; start position, > 25. The cleavage sites are indicated by the number of amino acid position N-terminus to the cleavage site.
